# Supplementary material for: Kosmotropic aqueous processing solution for green lithium battery cathode manufacturing
Source: Springer Nature journal article supplement (doi:10.1038/s41467-025-56831-9), 2025-02-16
Supplement: MOESM3 [file 41467_2025_56831_MOESM3_ESM.pdf › 41467_2025_56831_MOESM3_ESM.pdf]

## **Description of Additional Supplementary Files**

**Supplementary Data 1:** Unit cell of NCM811.

**Supplementary Data 2:** NCM811 cathode structure shown in Supplementary Fig. 3.

**Supplementary Data 3:** Initial structures for the OAc electrolyte simulations.

**Supplementary Data 4:** Final structures for the OAc electrolyte simulations.

**Supplementary Data 5:** Initial structures for the OTf electrolyte simulations.

**Supplementary Data 6:** Final structures for the OTf electrolyte simulations.

**Supplementary Data 7:** Initial structures for the SO<sub>4</sub> electrolyte simulations.

**Supplementary Data 8:** Final structures for the SO<sub>4</sub> electrolyte simulations.

**Supplementary Data 9:** Initial structures for the TFSI electrolyte simulations.

**Supplementary Data 10:** Final structures for the TFSI electrolyte simulations.

**Supplementary Data 11:** Initial structures for the water at the surface of NCM811 simulations.

**Supplementary Data 12:** Final structures for the water at the surface of NCM811 simulations.

**Supplementary Data 13:** Initial structures for the SO<sub>4</sub> at the surface of NCM811 simulations.

**Supplementary Data 14:** Final structures for the SO<sub>4</sub> at the surface of NCM811 simulations.

**Supplementary Data 15:** Initial structures for the TFSI at the surface of NCM811 simulations.

**Supplementary Data 16:** Final structures for the TFSI at the surface of NCM811 simulations.
