# Supplementary material for: Kosmotropic aqueous processing solution for green lithium battery cathode manufacturing
Source: Springer Nature journal article supplement (doi:10.1038/s41467-025-56831-9), 2025-02-16
Supplement: MOESM5 [file 41467_2025_56831_MOESM5_ESM.xlsx]

## Sheet: Fig. 2c
Anion	H-bond number	Interaction energy with water
		kJ mol\+(−1)
TFSI\+(−)	3.531	-3.839
OTf\+(−)	3.993	-8.388
OAc\+(−)	4.339	-25.29
SO\-(4)\+(2−)	8.678	-52.47

## Sheet: Fig. 2d
Wavernumber	Absorbance	Wavernumber	Absorbance	Wavernumber	Absorbance	Wavernumber	Absorbance	Wavernumber	Absorbance
cm\+(−1)		cm\+(−1)		cm\+(−1)		cm\+(−1)		cm\+(−1)
	0.5 m Li2SO4		H2O		1 m LiTFSI		1 m LiOTf		1 m LiOAc
3997.2	0.00317	3997.2	0.00284	3997.2	0.0031	3997.2	0.00326	3997.2	0.00274
3995.15	0.00334	3995.15	0.00307	3995.15	0.0033	3995.15	0.00331	3995.15	0.00317
3993.1	0.0034	3993.1	0.00339	3993.1	0.00315	3993.1	0.00313	3993.1	0.0037
3991.05	0.00327	3991.05	0.00348	3991.05	0.00283	3991.05	0.00297	3991.05	0.00377
3988.99	0.00313	3988.99	0.00341	3988.99	0.00275	3988.99	0.00298	3988.99	0.00344
3986.94	0.00329	3986.94	0.00326	3986.94	0.00302	3986.94	0.00309	3986.94	0.00322
3984.89	0.00368	3984.89	0.00297	3984.89	0.00339	3984.89	0.00323	3984.89	0.00316
3982.84	0.00389	3982.84	0.00275	3982.84	0.00355	3982.84	0.00321	3982.84	0.00305
3980.79	0.00362	3980.79	0.00279	3980.79	0.00342	3980.79	0.00301	3980.79	0.00294
3978.73	0.00315	3978.73	0.003	3978.73	0.00315	3978.73	0.00287	3978.73	0.003
3976.68	0.0031	3976.68	0.00322	3976.68	0.00289	3976.68	0.00279	3976.68	0.00313
3974.63	0.00343	3974.63	0.00334	3974.63	0.00281	3974.63	0.00272	3974.63	0.00316
3972.58	0.00368	3972.58	0.00345	3972.58	0.00294	3972.58	0.00284	3972.58	0.00333
3970.53	0.00369	3970.53	0.00363	3970.53	0.00319	3970.53	0.00322	3970.53	0.0037
3968.47	0.00361	3968.47	0.00373	3968.47	0.00336	3968.47	0.00349	3968.47	0.00391
3966.42	0.00353	3966.42	0.00367	3966.42	0.0034	3966.42	0.00338	3966.42	0.0038
3964.37	0.00343	3964.37	0.00341	3964.37	0.00331	3964.37	0.00319	3964.37	0.00353
3962.32	0.00337	3962.32	0.00319	3962.32	0.00314	3962.32	0.00322	3962.32	0.0034
3960.27	0.00337	3960.27	0.00339	3960.27	0.00322	3960.27	0.00339	3960.27	0.00351
3958.21	0.00327	3958.21	0.00367	3958.21	0.00331	3958.21	0.00349	3958.21	0.00358
3956.16	0.00306	3956.16	0.0036	3956.16	0.00313	3956.16	0.00354	3956.16	0.00345
3954.11	0.00301	3954.11	0.00346	3954.11	0.00302	3954.11	0.00357	3954.11	0.00331
3952.06	0.00316	3952.06	0.00354	3952.06	0.00304	3952.06	0.00366	3952.06	0.00331
3950.01	0.0033	3950.01	0.00357	3950.01	0.00305	3950.01	0.0038	3950.01	0.00348
3947.95	0.00321	3947.95	0.00339	3947.95	0.00308	3947.95	0.00374	3947.95	0.0036
3945.9	0.00322	3945.9	0.00334	3945.9	0.00326	3945.9	0.00354	3945.9	0.00353
3943.85	0.00335	3943.85	0.00348	3943.85	0.00347	3943.85	0.00341	3943.85	0.00345
3941.8	0.0033	3941.8	0.00345	3941.8	0.00352	3941.8	0.0034	3941.8	0.00344
3939.75	0.00329	3939.75	0.00338	3939.75	0.00363	3939.75	0.00363	3939.75	0.00352
3937.7	0.00335	3937.7	0.00335	3937.7	0.00366	3937.7	0.00383	3937.7	0.00357
3935.64	0.00343	3935.64	0.00317	3935.64	0.00351	3935.64	0.00377	3935.64	0.00354
3933.59	0.00367	3933.59	0.00307	3933.59	0.00345	3933.59	0.00371	3933.59	0.00355
3931.54	0.00387	3931.54	0.00318	3931.54	0.00343	3931.54	0.00365	3931.54	0.00348
3929.49	0.00377	3929.49	0.00329	3929.49	0.0034	3929.49	0.00349	3929.49	0.00334
3927.44	0.00362	3927.44	0.00333	3927.44	0.00349	3927.44	0.00342	3927.44	0.00337
3925.38	0.00363	3925.38	0.00336	3925.38	0.00348	3925.38	0.00337	3925.38	0.00358
3923.33	0.00364	3923.33	0.00337	3923.33	0.00347	3923.33	0.00335	3923.33	0.00374
3921.28	0.00358	3921.28	0.0034	3921.28	0.00364	3921.28	0.00336	3921.28	0.00373
3919.23	0.00358	3919.23	0.00333	3919.23	0.00379	3919.23	0.00325	3919.23	0.00359
3917.18	0.00353	3917.18	0.00313	3917.18	0.00383	3917.18	0.00305	3917.18	0.00332
3915.12	0.00332	3915.12	0.00316	3915.12	0.00365	3915.12	0.00301	3915.12	0.00303
3913.07	0.00326	3913.07	0.0034	3913.07	0.00331	3913.07	0.00311	3913.07	0.00305
3911.02	0.00356	3911.02	0.00348	3911.02	0.00316	3911.02	0.00323	3911.02	0.00326
3908.97	0.00398	3908.97	0.00352	3908.97	0.00326	3908.97	0.00332	3908.97	0.00336
3906.92	0.00397	3906.92	0.00351	3906.92	0.00338	3906.92	0.00336	3906.92	0.0034
3904.86	0.00347	3904.86	0.00329	3904.86	0.00334	3904.86	0.0034	3904.86	0.00346
3902.81	0.00318	3902.81	0.00318	3902.81	0.00318	3902.81	0.00343	3902.81	0.00335
3900.76	0.00342	3900.76	0.00341	3900.76	0.00329	3900.76	0.00336	3900.76	0.00316
3898.71	0.00372	3898.71	0.00369	3898.71	0.00367	3898.71	0.00344	3898.71	0.00333
3896.66	0.00369	3896.66	0.00374	3896.66	0.00375	3896.66	0.00365	3896.66	0.00358
3894.6	0.00325	3894.6	0.00344	3894.6	0.00349	3894.6	0.00356	3894.6	0.00344
3892.55	0.00283	3892.55	0.00305	3892.55	0.00323	3892.55	0.00312	3892.55	0.00304
3890.5	0.00293	3890.5	0.00311	3890.5	0.00307	3890.5	0.00274	3890.5	0.00274
3888.45	0.0032	3888.45	0.00329	3888.45	0.00297	3888.45	0.0026	3888.45	0.0027
3886.4	0.00317	3886.4	0.00319	3886.4	0.00301	3886.4	0.0027	3886.4	0.0028
3884.34	0.00296	3884.34	0.00303	3884.34	0.00307	3884.34	0.00306	3884.34	0.00298
3882.29	0.00292	3882.29	0.00296	3882.29	0.00289	3882.29	0.00312	3882.29	0.00306
3880.24	0.00317	3880.24	0.00293	3880.24	0.00294	3880.24	0.00296	3880.24	0.00315
3878.19	0.00348	3878.19	0.00297	3878.19	0.00333	3878.19	0.00331	3878.19	0.00346
3876.14	0.00367	3876.14	0.0031	3876.14	0.00343	3876.14	0.00379	3876.14	0.00373
3874.08	0.00367	3874.08	0.00324	3874.08	0.00337	3874.08	0.00375	3874.08	0.00378
3872.03	0.00329	3872.03	0.00331	3872.03	0.0035	3872.03	0.00341	3872.03	0.00372
3869.98	0.00284	3869.98	0.00311	3869.98	0.00353	3869.98	0.00331	3869.98	0.00348
3867.93	0.00282	3867.93	0.00275	3867.93	0.00312	3867.93	0.00326	3867.93	0.0031
3865.88	0.00304	3865.88	0.00283	3865.88	0.00273	3865.88	0.00326	3865.88	0.00293
3863.82	0.00337	3863.82	0.00335	3863.82	0.00293	3863.82	0.00357	3863.82	0.00298
3861.77	0.00363	3861.77	0.00364	3861.77	0.00344	3861.77	0.00387	3861.77	0.00314
3859.72	0.00366	3859.72	0.00364	3859.72	0.0035	3859.72	0.00378	3859.72	0.0032
3857.67	0.00364	3857.67	0.00371	3857.67	0.00327	3857.67	0.0036	3857.67	0.00306
3855.62	0.00359	3855.62	0.00378	3855.62	0.00339	3855.62	0.00352	3855.62	0.00272
3853.57	0.0033	3853.57	0.00363	3853.57	0.00385	3853.57	0.0031	3853.57	0.00248
3851.51	0.00308	3851.51	0.00347	3851.51	0.0038	3851.51	0.0028	3851.51	0.00286
3849.46	0.00328	3849.46	0.00357	3849.46	0.00357	3849.46	0.00303	3849.46	0.00343
3847.41	0.00361	3847.41	0.0036	3847.41	0.00351	3847.41	0.00324	3847.41	0.00375
3845.36	0.00384	3845.36	0.0035	3845.36	0.0036	3845.36	0.00333	3845.36	0.00381
3843.31	0.00383	3843.31	0.00358	3843.31	0.00388	3843.31	0.00345	3843.31	0.00376
3841.25	0.0038	3841.25	0.00378	3841.25	0.00412	3841.25	0.00364	3841.25	0.00367
3839.2	0.00377	3839.2	0.00385	3839.2	0.00414	3839.2	0.00391	3839.2	0.0035
3837.15	0.00364	3837.15	0.00383	3837.15	0.0042	3837.15	0.00424	3837.15	0.00354
3835.1	0.00379	3835.1	0.00399	3835.1	0.00424	3835.1	0.0043	3835.1	0.00392
3833.05	0.0041	3833.05	0.00423	3833.05	0.00408	3833.05	0.00415	3833.05	0.00424
3830.99	0.00409	3830.99	0.0042	3830.99	0.00397	3830.99	0.00397	3830.99	0.00418
3828.94	0.0038	3828.94	0.00389	3828.94	0.00404	3828.94	0.00375	3828.94	0.00399
3826.89	0.00378	3826.89	0.00366	3826.89	0.00407	3826.89	0.00357	3826.89	0.00396
3824.84	0.00394	3824.84	0.00354	3824.84	0.00396	3824.84	0.0035	3824.84	0.00405
3822.79	0.00381	3822.79	0.00339	3822.79	0.00383	3822.79	0.00342	3822.79	0.00413
3820.73	0.00367	3820.73	0.00355	3820.73	0.00383	3820.73	0.00351	3820.73	0.00426
3818.68	0.00397	3818.68	0.00404	3818.68	0.0038	3818.68	0.00391	3818.68	0.0044
3816.63	0.00428	3816.63	0.00409	3816.63	0.00368	3816.63	0.00417	3816.63	0.00419
3814.58	0.00444	3814.58	0.00395	3814.58	0.00387	3814.58	0.00417	3814.58	0.00376
3812.53	0.00458	3812.53	0.00408	3812.53	0.00404	3812.53	0.00414	3812.53	0.00371
3810.47	0.00463	3810.47	0.0043	3810.47	0.00394	3810.47	0.00406	3810.47	0.00393
3808.42	0.00464	3808.42	0.0044	3808.42	0.00378	3808.42	0.00397	3808.42	0.00401
3806.37	0.00468	3806.37	0.00428	3806.37	0.00352	3806.37	0.00416	3806.37	0.00384
3804.32	0.00454	3804.32	0.00395	3804.32	0.0035	3804.32	0.00446	3804.32	0.0037
3802.27	0.0043	3802.27	0.00379	3802.27	0.00398	3802.27	0.00444	3802.27	0.00385
3800.21	0.00437	3800.21	0.00428	3800.21	0.00473	3800.21	0.00442	3800.21	0.00434
3798.16	0.00457	3798.16	0.0046	3798.16	0.00507	3798.16	0.00457	3798.16	0.00475
3796.11	0.00455	3796.11	0.0043	3796.11	0.00474	3796.11	0.00456	3796.11	0.00478
3794.06	0.00447	3794.06	0.00414	3794.06	0.00445	3794.06	0.00444	3794.06	0.0045
3792.01	0.00448	3792.01	0.00433	3792.01	0.00449	3792.01	0.00437	3792.01	0.0042
3789.95	0.00456	3789.95	0.00454	3789.95	0.00443	3789.95	0.00439	3789.95	0.00415
3787.9	0.00466	3787.9	0.0047	3787.9	0.00431	3787.9	0.0045	3787.9	0.00437
3785.85	0.00467	3785.85	0.00482	3785.85	0.00443	3785.85	0.00448	3785.85	0.00454
3783.8	0.00476	3783.8	0.00501	3783.8	0.00469	3783.8	0.00437	3783.8	0.00459
3781.75	0.00496	3781.75	0.00518	3781.75	0.00482	3781.75	0.00442	3781.75	0.0047
3779.69	0.00494	3779.69	0.0049	3779.69	0.00479	3779.69	0.00455	3779.69	0.00457
3777.64	0.00481	3777.64	0.00443	3777.64	0.0048	3777.64	0.00467	3777.64	0.00436
3775.59	0.0049	3775.59	0.0044	3775.59	0.00482	3775.59	0.00463	3775.59	0.0046
3773.54	0.00506	3773.54	0.00469	3773.54	0.00484	3773.54	0.00453	3773.54	0.005
3771.49	0.00519	3771.49	0.00496	3771.49	0.00509	3771.49	0.00478	3771.49	0.00534
3769.44	0.00558	3769.44	0.00486	3769.44	0.00546	3769.44	0.0052	3769.44	0.00563
3767.38	0.00592	3767.38	0.00457	3767.38	0.00556	3767.38	0.00513	3767.38	0.00563
3765.33	0.00577	3765.33	0.00463	3765.33	0.00542	3765.33	0.00489	3765.33	0.00537
3763.28	0.0055	3763.28	0.00501	3763.28	0.00529	3763.28	0.00505	3763.28	0.00513
3761.23	0.00536	3761.23	0.00528	3761.23	0.00525	3761.23	0.00541	3761.23	0.0051
3759.18	0.00527	3759.18	0.00547	3759.18	0.00531	3759.18	0.0056	3759.18	0.00516
3757.12	0.00533	3757.12	0.0057	3757.12	0.00559	3757.12	0.00553	3757.12	0.00518
3755.07	0.00569	3755.07	0.00581	3755.07	0.00606	3755.07	0.0055	3755.07	0.00538
3753.02	0.00609	3753.02	0.00582	3753.02	0.0062	3753.02	0.00541	3753.02	0.00591
3750.97	0.00612	3750.97	0.0058	3750.97	0.0058	3750.97	0.00512	3750.97	0.00664
3748.92	0.00599	3748.92	0.006	3748.92	0.00576	3748.92	0.00556	3748.92	0.007
3746.86	0.00586	3746.86	0.00624	3746.86	0.00582	3746.86	0.00625	3746.86	0.00676
3744.81	0.00597	3744.81	0.00617	3744.81	0.00573	3744.81	0.00652	3744.81	0.00629
3742.76	0.00643	3742.76	0.00623	3742.76	0.00621	3742.76	0.00668	3742.76	0.00622
3740.71	0.00654	3740.71	0.00663	3740.71	0.00684	3740.71	0.00694	3740.71	0.00657
3738.66	0.00654	3738.66	0.00704	3738.66	0.00693	3738.66	0.0072	3738.66	0.00683
3736.6	0.00694	3736.6	0.00732	3736.6	0.00659	3736.6	0.00734	3736.6	0.00697
3734.55	0.00736	3734.55	0.00736	3734.55	0.00647	3734.55	0.00724	3734.55	0.00719
3732.5	0.00757	3732.5	0.00704	3732.5	0.00687	3732.5	0.00717	3732.5	0.00719
3730.45	0.00768	3730.45	0.00691	3730.45	0.0073	3730.45	0.00718	3730.45	0.00696
3728.4	0.00762	3728.4	0.00727	3728.4	0.00761	3728.4	0.0073	3728.4	0.00724
3726.34	0.00766	3726.34	0.00776	3726.34	0.00796	3726.34	0.00761	3726.34	0.00796
3724.29	0.00793	3724.29	0.00798	3724.29	0.00805	3724.29	0.00781	3724.29	0.00833
3722.24	0.00836	3722.24	0.00813	3722.24	0.00797	3722.24	0.00802	3722.24	0.00841
3720.19	0.00879	3720.19	0.00851	3720.19	0.00815	3720.19	0.0084	3720.19	0.00846
3718.14	0.0091	3718.14	0.00908	3718.14	0.00869	3718.14	0.00866	3718.14	0.00854
3716.08	0.00941	3716.08	0.00949	3716.08	0.00919	3716.08	0.00892	3716.08	0.00882
3714.03	0.00975	3714.03	0.00961	3714.03	0.00928	3714.03	0.00929	3714.03	0.00896
3711.98	0.0102	3711.98	0.00988	3711.98	0.00954	3711.98	0.00987	3711.98	0.00912
3709.93	0.01078	3709.93	0.01038	3709.93	0.01037	3709.93	0.01083	3709.93	0.01005
3707.88	0.01098	3707.88	0.01071	3707.88	0.0109	3707.88	0.01151	3707.88	0.01091
3705.82	0.01091	3705.82	0.0109	3705.82	0.01108	3705.82	0.01167	3705.82	0.01108
3703.77	0.01121	3703.77	0.01117	3703.77	0.01147	3703.77	0.01177	3703.77	0.01097
3701.72	0.01211	3701.72	0.01194	3701.72	0.01223	3701.72	0.01223	3701.72	0.01128
3699.67	0.01321	3699.67	0.01299	3699.67	0.01322	3699.67	0.01322	3699.67	0.01231
3697.62	0.01412	3697.62	0.01384	3697.62	0.01425	3697.62	0.0143	3697.62	0.01333
3695.56	0.01478	3695.56	0.01463	3695.56	0.01516	3695.56	0.01515	3695.56	0.01403
3693.51	0.0153	3693.51	0.01543	3693.51	0.01602	3693.51	0.01605	3693.51	0.01468
3691.46	0.01584	3691.46	0.01624	3691.46	0.01729	3691.46	0.01709	3691.46	0.01539
3689.41	0.01659	3689.41	0.01717	3689.41	0.01908	3689.41	0.01786	3689.41	0.01618
3687.36	0.01798	3687.36	0.0183	3687.36	0.02055	3687.36	0.01861	3687.36	0.01738
3685.31	0.01944	3685.31	0.01936	3685.31	0.02142	3685.31	0.01975	3685.31	0.01868
3683.25	0.02067	3683.25	0.02025	3683.25	0.02239	3683.25	0.02112	3683.25	0.01985
3681.2	0.02186	3681.2	0.02119	3681.2	0.02382	3681.2	0.02253	3681.2	0.02107
3679.15	0.02285	3679.15	0.02249	3679.15	0.02561	3679.15	0.02383	3679.15	0.02254
3677.1	0.02388	3677.1	0.02432	3677.1	0.02762	3677.1	0.0255	3677.1	0.02417
3675.05	0.02581	3675.05	0.02652	3675.05	0.02969	3675.05	0.02837	3675.05	0.02581
3672.99	0.0277	3672.99	0.02812	3672.99	0.03114	3672.99	0.03081	3672.99	0.02736
3670.94	0.02924	3670.94	0.02961	3670.94	0.03273	3670.94	0.03209	3670.94	0.02895
3668.89	0.03122	3668.89	0.03153	3668.89	0.03526	3668.89	0.03339	3668.89	0.03063
3666.84	0.03293	3666.84	0.03306	3666.84	0.03756	3666.84	0.03506	3666.84	0.03212
3664.79	0.03456	3664.79	0.0345	3664.79	0.03958	3664.79	0.03687	3664.79	0.03369
3662.73	0.03654	3662.73	0.03634	3662.73	0.04166	3662.73	0.03876	3662.73	0.03553
3660.68	0.03858	3660.68	0.0385	3660.68	0.04349	3660.68	0.0407	3660.68	0.03759
3658.63	0.04068	3658.63	0.04075	3658.63	0.04533	3658.63	0.04274	3658.63	0.03975
3656.58	0.04301	3656.58	0.04307	3656.58	0.04784	3656.58	0.04518	3656.58	0.04203
3654.53	0.0451	3654.53	0.04511	3654.53	0.05045	3654.53	0.04761	3654.53	0.04423
3652.47	0.04688	3652.47	0.04655	3652.47	0.0523	3652.47	0.04956	3652.47	0.04605
3650.42	0.04916	3650.42	0.04837	3650.42	0.05403	3650.42	0.05168	3650.42	0.04792
3648.37	0.05208	3648.37	0.05127	3648.37	0.0567	3648.37	0.05409	3648.37	0.0502
3646.32	0.05453	3646.32	0.05362	3646.32	0.06003	3646.32	0.05627	3646.32	0.05224
3644.27	0.05624	3644.27	0.05506	3644.27	0.06281	3644.27	0.05811	3644.27	0.05374
3642.21	0.05765	3642.21	0.05653	3642.21	0.06497	3642.21	0.0599	3642.21	0.05527
3640.16	0.05913	3640.16	0.0583	3640.16	0.06712	3640.16	0.06192	3640.16	0.05707
3638.11	0.06097	3638.11	0.06007	3638.11	0.06953	3638.11	0.06388	3638.11	0.05889
3636.06	0.06307	3636.06	0.062	3636.06	0.07191	3636.06	0.06582	3636.06	0.0607
3634.01	0.06496	3634.01	0.06416	3634.01	0.07415	3634.01	0.06802	3634.01	0.06261
3631.95	0.06644	3631.95	0.066	3631.95	0.07591	3631.95	0.07005	3631.95	0.06434
3629.9	0.06819	3629.9	0.06751	3629.9	0.07787	3629.9	0.07205	3629.9	0.06619
3627.85	0.07078	3627.85	0.06916	3627.85	0.08102	3627.85	0.0746	3627.85	0.06863
3625.8	0.07287	3625.8	0.07074	3625.8	0.08342	3625.8	0.07664	3625.8	0.07043
3623.75	0.07442	3623.75	0.07236	3623.75	0.08511	3623.75	0.07805	3623.75	0.07154
3621.69	0.07595	3621.69	0.07413	3621.69	0.08711	3621.69	0.07954	3621.69	0.07269
3619.64	0.07762	3619.64	0.07612	3619.64	0.08974	3619.64	0.08161	3619.64	0.0745
3617.59	0.0793	3617.59	0.07798	3617.59	0.09228	3617.59	0.08379	3617.59	0.07679
3615.54	0.08101	3615.54	0.07948	3615.54	0.0941	3615.54	0.0855	3615.54	0.07881
3613.49	0.08303	3613.49	0.0814	3613.49	0.09601	3613.49	0.08736	3613.49	0.08068
3611.43	0.08522	3611.43	0.08366	3611.43	0.09832	3611.43	0.08971	3611.43	0.0826
3609.38	0.08743	3609.38	0.08542	3609.38	0.10064	3609.38	0.09219	3609.38	0.08461
3607.33	0.08941	3607.33	0.0868	3607.33	0.1027	3607.33	0.09439	3607.33	0.08623
3605.28	0.09067	3605.28	0.08803	3605.28	0.10438	3605.28	0.09602	3605.28	0.0873
3603.23	0.09159	3603.23	0.08926	3603.23	0.10601	3603.23	0.09747	3603.23	0.08857
3601.18	0.09321	3601.18	0.09086	3601.18	0.10799	3601.18	0.0994	3601.18	0.09027
3599.12	0.09577	3599.12	0.09272	3599.12	0.11002	3599.12	0.1018	3599.12	0.09225
3597.07	0.09827	3597.07	0.0945	3597.07	0.1118	3597.07	0.10415	3597.07	0.09435
3595.02	0.10014	3595.02	0.09624	3595.02	0.1137	3595.02	0.10622	3595.02	0.09616
3592.97	0.10191	3592.97	0.09803	3592.97	0.11584	3592.97	0.10809	3592.97	0.09785
3590.92	0.10371	3590.92	0.09972	3590.92	0.11775	3590.92	0.10991	3590.92	0.09965
3588.86	0.10561	3588.86	0.10144	3588.86	0.11946	3588.86	0.112	3588.86	0.10153
3586.81	0.10778	3586.81	0.10358	3586.81	0.12125	3586.81	0.11448	3586.81	0.10342
3584.76	0.10939	3584.76	0.10564	3584.76	0.12283	3584.76	0.11661	3584.76	0.1051
3582.71	0.11072	3582.71	0.10725	3582.71	0.12419	3582.71	0.11822	3582.71	0.10678
3580.66	0.11278	3580.66	0.109	3580.66	0.12551	3580.66	0.12007	3580.66	0.10874
3578.6	0.11543	3578.6	0.11098	3578.6	0.12691	3578.6	0.12245	3578.6	0.11081
3576.55	0.11797	3576.55	0.11301	3576.55	0.12873	3576.55	0.12486	3576.55	0.11287
3574.5	0.12014	3574.5	0.11523	3574.5	0.13066	3574.5	0.12686	3574.5	0.11502
3572.45	0.12177	3572.45	0.11718	3572.45	0.13199	3572.45	0.12865	3572.45	0.11683
3570.4	0.12325	3570.4	0.11853	3570.4	0.133	3570.4	0.13064	3570.4	0.11819
3568.34	0.12507	3568.34	0.1198	3568.34	0.13409	3568.34	0.13291	3568.34	0.11982
3566.29	0.12727	3566.29	0.12178	3566.29	0.1354	3566.29	0.13542	3566.29	0.12228
3564.24	0.12964	3564.24	0.12423	3564.24	0.13697	3564.24	0.13771	3564.24	0.1247
3562.19	0.13192	3562.19	0.12654	3562.19	0.13866	3562.19	0.13968	3562.19	0.12675
3560.14	0.13396	3560.14	0.12882	3560.14	0.14052	3560.14	0.14154	3560.14	0.12893
3558.08	0.13583	3558.08	0.131	3558.08	0.14223	3558.08	0.14349	3558.08	0.13117
3556.03	0.13776	3556.03	0.13275	3556.03	0.14349	3556.03	0.14568	3556.03	0.13327
3553.98	0.14004	3553.98	0.13466	3553.98	0.14481	3553.98	0.14808	3553.98	0.13542
3551.93	0.14243	3551.93	0.13726	3551.93	0.14637	3551.93	0.15054	3551.93	0.13746
3549.88	0.14461	3549.88	0.13979	3549.88	0.14797	3549.88	0.15291	3549.88	0.1393
3547.82	0.14679	3547.82	0.14174	3547.82	0.14966	3547.82	0.15521	3547.82	0.14146
3545.77	0.14896	3545.77	0.14355	3545.77	0.15123	3545.77	0.15722	3545.77	0.14402
3543.72	0.15113	3543.72	0.14549	3543.72	0.15279	3543.72	0.15922	3543.72	0.14646
3541.67	0.15356	3541.67	0.1476	3541.67	0.15446	3541.67	0.16135	3541.67	0.14857
3539.62	0.1561	3539.62	0.14998	3539.62	0.15619	3539.62	0.16334	3539.62	0.1507
3537.56	0.15878	3537.56	0.15244	3537.56	0.15796	3537.56	0.16547	3537.56	0.15303
3535.51	0.16177	3535.51	0.15472	3535.51	0.15978	3535.51	0.16794	3535.51	0.15566
3533.46	0.16439	3533.46	0.15687	3533.46	0.16154	3533.46	0.17027	3533.46	0.15837
3531.41	0.16632	3531.41	0.15901	3531.41	0.16327	3531.41	0.17233	3531.41	0.16065
3529.36	0.16838	3529.36	0.16123	3529.36	0.16525	3529.36	0.17446	3529.36	0.16279
3527.3	0.17094	3527.3	0.16346	3527.3	0.1671	3527.3	0.1766	3527.3	0.16523
3525.25	0.17336	3525.25	0.16565	3525.25	0.16848	3525.25	0.17861	3525.25	0.16764
3523.2	0.1757	3523.2	0.16814	3523.2	0.17005	3523.2	0.18081	3523.2	0.16974
3521.15	0.17844	3521.15	0.17084	3521.15	0.17197	3521.15	0.18301	3521.15	0.17179
3519.1	0.18102	3519.1	0.17325	3519.1	0.1738	3519.1	0.18507	3519.1	0.17407
3517.04	0.18337	3517.04	0.17574	3517.04	0.1759	3517.04	0.18749	3517.04	0.17661
3514.99	0.18594	3514.99	0.17823	3514.99	0.17848	3514.99	0.18999	3514.99	0.1791
3512.94	0.18845	3512.94	0.18038	3512.94	0.18084	3512.94	0.1922	3512.94	0.18157
3510.89	0.19053	3510.89	0.1826	3510.89	0.18262	3510.89	0.19434	3510.89	0.18421
3508.84	0.1926	3508.84	0.18501	3508.84	0.18422	3508.84	0.19644	3508.84	0.18668
3506.79	0.19496	3506.79	0.18725	3506.79	0.18591	3506.79	0.19831	3506.79	0.18865
3504.73	0.19747	3504.73	0.18946	3504.73	0.18791	3504.73	0.20015	3504.73	0.19059
3502.68	0.19991	3502.68	0.19189	3502.68	0.1904	3502.68	0.20235	3502.68	0.19323
3500.63	0.20208	3500.63	0.19413	3500.63	0.19282	3500.63	0.20446	3500.63	0.19596
3498.58	0.20436	3498.58	0.19602	3498.58	0.19481	3498.58	0.20614	3498.58	0.19803
3496.53	0.20699	3496.53	0.19797	3496.53	0.1966	3496.53	0.20778	3496.53	0.20007
3494.47	0.20971	3494.47	0.2003	3494.47	0.1986	3494.47	0.20981	3494.47	0.20261
3492.42	0.21227	3492.42	0.20298	3492.42	0.201	3492.42	0.21235	3492.42	0.20542
3490.37	0.21463	3490.37	0.20567	3490.37	0.20326	3490.37	0.21507	3490.37	0.20819
3488.32	0.21676	3488.32	0.20814	3488.32	0.20512	3488.32	0.21743	3488.32	0.21078
3486.27	0.21903	3486.27	0.21072	3486.27	0.20701	3486.27	0.2194	3486.27	0.21331
3484.21	0.22169	3484.21	0.21339	3484.21	0.2092	3484.21	0.22143	3484.21	0.21589
3482.16	0.22456	3482.16	0.21583	3482.16	0.21155	3482.16	0.22365	3482.16	0.21826
3480.11	0.22753	3480.11	0.21821	3480.11	0.21381	3480.11	0.22583	3480.11	0.22045
3478.06	0.23046	3478.06	0.22068	3478.06	0.21609	3478.06	0.22805	3478.06	0.22279
3476.01	0.23304	3476.01	0.22311	3476.01	0.21862	3476.01	0.23071	3476.01	0.22526
3473.95	0.23526	3473.95	0.22544	3473.95	0.2211	3473.95	0.2334	3473.95	0.22792
3471.9	0.23754	3471.9	0.22778	3471.9	0.22321	3471.9	0.23544	3471.9	0.23061
3469.85	0.24003	3469.85	0.23003	3469.85	0.22523	3469.85	0.23724	3469.85	0.2328
3467.8	0.24281	3467.8	0.2326	3467.8	0.22757	3467.8	0.23955	3467.8	0.23496
3465.75	0.24595	3465.75	0.23569	3465.75	0.23006	3465.75	0.24221	3465.75	0.23789
3463.69	0.24899	3463.69	0.23853	3463.69	0.23254	3463.69	0.24486	3463.69	0.241
3461.64	0.25154	3461.64	0.24079	3461.64	0.23502	3461.64	0.24718	3461.64	0.24341
3459.59	0.25387	3459.59	0.24313	3459.59	0.23741	3459.59	0.24931	3459.59	0.24581
3457.54	0.25639	3457.54	0.24594	3457.54	0.23953	3457.54	0.25169	3457.54	0.24881
3455.49	0.25911	3455.49	0.24896	3455.49	0.24144	3455.49	0.25409	3455.49	0.25166
3453.43	0.26204	3453.43	0.25182	3453.43	0.24346	3453.43	0.25626	3453.43	0.25386
3451.38	0.26503	3451.38	0.25425	3451.38	0.24557	3451.38	0.2584	3451.38	0.25602
3449.33	0.2675	3449.33	0.25673	3449.33	0.24776	3449.33	0.26073	3449.33	0.25864
3447.28	0.26936	3447.28	0.25958	3447.28	0.25024	3447.28	0.26319	3447.28	0.26156
3445.23	0.27146	3445.23	0.26223	3445.23	0.25272	3445.23	0.26589	3445.23	0.26455
3443.17	0.27452	3443.17	0.26444	3443.17	0.25509	3443.17	0.26885	3443.17	0.26742
3441.12	0.27826	3441.12	0.26664	3441.12	0.25755	3441.12	0.27138	3441.12	0.26979
3439.07	0.28166	3439.07	0.26929	3439.07	0.25985	3439.07	0.2732	3439.07	0.27192
3437.02	0.28436	3437.02	0.27226	3437.02	0.262	3437.02	0.27487	3437.02	0.27462
3434.97	0.2867	3434.97	0.27499	3434.97	0.2643	3434.97	0.27689	3434.97	0.27755
3432.91	0.289	3432.91	0.27751	3432.91	0.26669	3432.91	0.27928	3432.91	0.27987
3430.86	0.29139	3430.86	0.2801	3430.86	0.26887	3430.86	0.28172	3430.86	0.28201
3428.81	0.29396	3428.81	0.2829	3428.81	0.2707	3428.81	0.28407	3428.81	0.2846
3426.76	0.29699	3426.76	0.28598	3426.76	0.27263	3426.76	0.28665	3426.76	0.28745
3424.71	0.30023	3424.71	0.28903	3424.71	0.27514	3424.71	0.28928	3424.71	0.29013
3422.66	0.30314	3422.66	0.29174	3422.66	0.27777	3422.66	0.29135	3422.66	0.29252
3420.6	0.30577	3420.6	0.29403	3420.6	0.2798	3420.6	0.29312	3420.6	0.2951
3418.55	0.30827	3418.55	0.2959	3418.55	0.28162	3418.55	0.29528	3418.55	0.29789
3416.5	0.31041	3416.5	0.29772	3416.5	0.28371	3416.5	0.29762	3416.5	0.30017
3414.45	0.31231	3414.45	0.29996	3414.45	0.28576	3414.45	0.29988	3414.45	0.30198
3412.4	0.31439	3412.4	0.30235	3412.4	0.28761	3412.4	0.30223	3412.4	0.3041
3410.34	0.31719	3410.34	0.30474	3410.34	0.28966	3410.34	0.30466	3410.34	0.30697
3408.29	0.32038	3408.29	0.30724	3408.29	0.29176	3408.29	0.30664	3408.29	0.30987
3406.24	0.32289	3406.24	0.30955	3406.24	0.29332	3406.24	0.30788	3406.24	0.31224
3404.19	0.32466	3404.19	0.31163	3404.19	0.29455	3404.19	0.30921	3404.19	0.31438
3402.14	0.32636	3402.14	0.31366	3402.14	0.29631	3402.14	0.31123	3402.14	0.316
3400.08	0.32848	3400.08	0.31578	3400.08	0.29864	3400.08	0.31358	3400.08	0.31744
3398.03	0.33096	3398.03	0.31824	3398.03	0.30067	3398.03	0.31577	3398.03	0.31983
3395.98	0.3333	3395.98	0.32063	3395.98	0.30192	3395.98	0.31749	3395.98	0.32256
3393.93	0.3354	3393.93	0.32243	3393.93	0.30275	3393.93	0.31846	3393.93	0.32475
3391.88	0.33754	3391.88	0.32379	3391.88	0.30394	3391.88	0.31895	3391.88	0.32689
3389.82	0.33952	3389.82	0.32518	3389.82	0.30547	3389.82	0.32002	3389.82	0.32889
3387.77	0.34124	3387.77	0.32724	3387.77	0.30683	3387.77	0.32188	3387.77	0.33065
3385.72	0.34295	3385.72	0.32948	3385.72	0.30833	3385.72	0.32363	3385.72	0.33248
3383.67	0.34492	3383.67	0.33099	3383.67	0.31003	3383.67	0.32508	3383.67	0.33409
3381.62	0.34709	3381.62	0.33219	3381.62	0.31134	3381.62	0.32628	3381.62	0.33562
3379.56	0.34882	3379.56	0.33385	3379.56	0.31225	3379.56	0.32718	3379.56	0.33738
3377.51	0.34994	3377.51	0.33547	3377.51	0.31303	3377.51	0.32813	3377.51	0.3385
3375.46	0.351	3375.46	0.33669	3375.46	0.31391	3375.46	0.32911	3375.46	0.33896
3373.41	0.35206	3373.41	0.3379	3373.41	0.31452	3373.41	0.32996	3373.41	0.33989
3371.36	0.35287	3371.36	0.33898	3371.36	0.31426	3371.36	0.33078	3371.36	0.34118
3369.3	0.35398	3369.3	0.34003	3369.3	0.31422	3369.3	0.33157	3369.3	0.34231
3367.25	0.35564	3367.25	0.34153	3367.25	0.31533	3367.25	0.33214	3367.25	0.34356
3365.2	0.35721	3365.2	0.34296	3365.2	0.31657	3365.2	0.33282	3365.2	0.34506
3363.15	0.3584	3363.15	0.34365	3363.15	0.31717	3363.15	0.33403	3363.15	0.34631
3361.1	0.35945	3361.1	0.34427	3361.1	0.31737	3361.1	0.33522	3361.1	0.34736
3359.04	0.36023	3359.04	0.34553	3359.04	0.31757	3359.04	0.33552	3359.04	0.34824
3356.99	0.36094	3356.99	0.34664	3356.99	0.3178	3356.99	0.33516	3356.99	0.34885
3354.94	0.36205	3354.94	0.34712	3354.94	0.31789	3354.94	0.33511	3354.94	0.34983
3352.89	0.36297	3352.89	0.34743	3352.89	0.31801	3352.89	0.33582	3352.89	0.35115
3350.84	0.36365	3350.84	0.34791	3350.84	0.3182	3350.84	0.33649	3350.84	0.35198
3348.78	0.36475	3348.78	0.34867	3348.78	0.31811	3348.78	0.33646	3348.78	0.35236
3346.73	0.36545	3346.73	0.34922	3346.73	0.31779	3346.73	0.33608	3346.73	0.35268
3344.68	0.3655	3344.68	0.34948	3344.68	0.31755	3344.68	0.33602	3344.68	0.35301
3342.63	0.36603	3342.63	0.35026	3342.63	0.31744	3342.63	0.33615	3342.63	0.35351
3340.58	0.36673	3340.58	0.35107	3340.58	0.31755	3340.58	0.33573	3340.58	0.35386
3338.53	0.36684	3338.53	0.35093	3338.53	0.31777	3338.53	0.33515	3338.53	0.35371
3336.47	0.36697	3336.47	0.35056	3336.47	0.31774	3336.47	0.3353	3336.47	0.35382
3334.42	0.36733	3334.42	0.35072	3334.42	0.31747	3334.42	0.33579	3334.42	0.35484
3332.37	0.36722	3332.37	0.35095	3332.37	0.31724	3332.37	0.33585	3332.37	0.356
3330.32	0.36705	3330.32	0.35142	3330.32	0.31716	3330.32	0.33583	3330.32	0.35664
3328.27	0.36746	3328.27	0.35196	3328.27	0.31702	3328.27	0.33578	3328.27	0.35681
3326.21	0.36793	3326.21	0.35173	3326.21	0.31666	3326.21	0.33535	3326.21	0.35696
3324.16	0.36802	3324.16	0.35123	3324.16	0.31609	3324.16	0.33489	3324.16	0.3571
3322.11	0.36815	3322.11	0.35118	3322.11	0.31557	3322.11	0.33452	3322.11	0.35687
3320.06	0.36865	3320.06	0.35135	3320.06	0.31499	3320.06	0.33395	3320.06	0.35669
3318.01	0.3694	3318.01	0.35164	3318.01	0.31435	3318.01	0.33349	3318.01	0.35683
3315.95	0.37015	3315.95	0.35207	3315.95	0.31411	3315.95	0.33343	3315.95	0.35696
3313.9	0.37056	3313.9	0.3522	3313.9	0.31413	3313.9	0.33354	3313.9	0.35702
3311.85	0.37016	3311.85	0.35191	3311.85	0.31392	3311.85	0.33349	3311.85	0.35702
3309.8	0.36927	3309.8	0.3516	3309.8	0.31333	3309.8	0.33295	3309.8	0.35676
3307.75	0.369	3307.75	0.35143	3307.75	0.3123	3307.75	0.33238	3307.75	0.35674
3305.69	0.36941	3305.69	0.35115	3305.69	0.31115	3305.69	0.33222	3305.69	0.35727
3303.64	0.36996	3303.64	0.35096	3303.64	0.31064	3303.64	0.3323	3303.64	0.35757
3301.59	0.37066	3301.59	0.35138	3301.59	0.31099	3301.59	0.33244	3301.59	0.35765
3299.54	0.37126	3299.54	0.35209	3299.54	0.3113	3299.54	0.33213	3299.54	0.35812
3297.49	0.37115	3297.49	0.35237	3297.49	0.31101	3297.49	0.33153	3297.49	0.35844
3295.43	0.3707	3295.43	0.3522	3295.43	0.31051	3295.43	0.33134	3295.43	0.35846
3293.38	0.37033	3293.38	0.35222	3293.38	0.31011	3293.38	0.33106	3293.38	0.3586
3291.33	0.37003	3291.33	0.35257	3291.33	0.30975	3291.33	0.33035	3291.33	0.35868
3289.28	0.37035	3289.28	0.35272	3289.28	0.30948	3289.28	0.32994	3289.28	0.35871
3287.23	0.37125	3287.23	0.35261	3287.23	0.30933	3287.23	0.3298	3287.23	0.35879
3285.17	0.37184	3285.17	0.35263	3285.17	0.309	3285.17	0.32974	3285.17	0.35887
3283.12	0.37181	3283.12	0.35259	3283.12	0.3083	3283.12	0.3299	3283.12	0.35912
3281.07	0.37139	3281.07	0.35241	3281.07	0.30757	3281.07	0.33004	3281.07	0.35966
3279.02	0.37074	3279.02	0.35258	3279.02	0.30717	3279.02	0.32983	3279.02	0.35986
3276.97	0.37034	3276.97	0.35289	3276.97	0.30708	3276.97	0.32939	3276.97	0.35947
3274.91	0.37052	3274.91	0.35287	3274.91	0.30691	3274.91	0.32917	3274.91	0.35929
3272.86	0.37096	3272.86	0.35265	3272.86	0.30644	3272.86	0.32926	3272.86	0.35936
3270.81	0.37139	3270.81	0.35233	3270.81	0.30596	3270.81	0.32912	3270.81	0.35935
3268.76	0.37162	3268.76	0.35164	3268.76	0.30561	3268.76	0.32866	3268.76	0.35944
3266.71	0.37194	3266.71	0.35111	3266.71	0.30553	3266.71	0.32831	3266.71	0.35973
3264.65	0.37226	3264.65	0.3513	3264.65	0.30565	3264.65	0.32804	3264.65	0.35999
3262.6	0.37198	3262.6	0.35172	3262.6	0.30541	3262.6	0.3273	3262.6	0.35975
3260.55	0.37139	3260.55	0.35187	3260.55	0.30476	3260.55	0.32619	3260.55	0.35935
3258.5	0.37096	3258.5	0.35158	3258.5	0.30401	3258.5	0.32548	3258.5	0.35933
3256.45	0.37069	3256.45	0.35102	3256.45	0.30343	3256.45	0.32547	3256.45	0.35914
3254.4	0.3707	3254.4	0.35045	3254.4	0.30302	3254.4	0.3257	3254.4	0.35899
3252.34	0.37077	3252.34	0.34984	3252.34	0.30199	3252.34	0.32554	3252.34	0.35919
3250.29	0.37034	3250.29	0.34942	3250.29	0.30054	3250.29	0.32494	3250.29	0.35899
3248.24	0.3698	3248.24	0.34911	3248.24	0.29996	3248.24	0.32418	3248.24	0.35849
3246.19	0.36963	3246.19	0.3485	3246.19	0.29989	3246.19	0.32342	3246.19	0.35827
3244.14	0.3693	3244.14	0.34778	3244.14	0.29927	3244.14	0.32262	3244.14	0.35827
3242.08	0.36861	3242.08	0.34739	3242.08	0.29835	3242.08	0.32164	3242.08	0.35775
3240.03	0.36812	3240.03	0.34705	3240.03	0.29731	3240.03	0.32046	3240.03	0.35659
3237.98	0.36769	3237.98	0.34664	3237.98	0.29603	3237.98	0.31916	3237.98	0.35566
3235.93	0.36696	3235.93	0.34609	3235.93	0.29476	3235.93	0.31789	3235.93	0.35533
3233.88	0.3664	3233.88	0.34518	3233.88	0.29359	3233.88	0.31679	3233.88	0.35489
3231.82	0.36578	3231.82	0.34387	3231.82	0.29253	3231.82	0.31607	3231.82	0.35384
3229.77	0.36425	3229.77	0.34237	3229.77	0.29132	3229.77	0.31541	3229.77	0.35276
3227.72	0.36261	3227.72	0.34107	3227.72	0.28966	3227.72	0.31417	3227.72	0.35199
3225.67	0.3618	3225.67	0.3399	3225.67	0.28808	3225.67	0.31239	3225.67	0.35123
3223.62	0.36106	3223.62	0.33869	3223.62	0.28694	3223.62	0.31062	3223.62	0.35014
3221.56	0.35971	3221.56	0.33749	3221.56	0.28582	3221.56	0.30903	3221.56	0.34868
3219.51	0.35799	3219.51	0.33636	3219.51	0.28431	3219.51	0.30732	3219.51	0.34729
3217.46	0.35633	3217.46	0.33507	3217.46	0.28249	3217.46	0.30538	3217.46	0.34601
3215.41	0.35488	3215.41	0.33329	3215.41	0.28056	3215.41	0.30352	3215.41	0.34435
3213.36	0.3534	3213.36	0.33104	3213.36	0.27859	3213.36	0.30188	3213.36	0.34273
3211.3	0.35149	3211.3	0.32868	3211.3	0.27666	3211.3	0.29997	3211.3	0.34133
3209.25	0.34934	3209.25	0.32663	3209.25	0.27466	3209.25	0.29756	3209.25	0.33968
3207.2	0.34761	3207.2	0.32485	3207.2	0.27256	3207.2	0.29532	3207.2	0.33799
3205.15	0.34603	3205.15	0.32295	3205.15	0.27048	3205.15	0.29338	3205.15	0.33616
3203.1	0.34383	3203.1	0.32063	3203.1	0.2682	3203.1	0.29126	3203.1	0.33391
3201.04	0.34117	3201.04	0.31792	3201.04	0.26568	3201.04	0.28882	3201.04	0.33172
3198.99	0.3387	3198.99	0.31526	3198.99	0.26309	3198.99	0.28613	3198.99	0.32983
3196.94	0.33666	3196.94	0.31302	3196.94	0.26054	3196.94	0.28341	3196.94	0.3279
3194.89	0.33457	3194.89	0.31077	3194.89	0.25798	3194.89	0.28084	3194.89	0.3256
3192.84	0.3321	3192.84	0.30809	3192.84	0.25523	3192.84	0.2784	3192.84	0.32302
3190.78	0.32937	3190.78	0.3052	3190.78	0.25246	3190.78	0.27586	3190.78	0.3204
3188.73	0.32637	3188.73	0.30227	3188.73	0.2498	3188.73	0.27317	3188.73	0.3177
3186.68	0.32339	3186.68	0.2994	3186.68	0.24712	3186.68	0.2704	3186.68	0.31509
3184.63	0.3208	3184.63	0.2966	3184.63	0.24437	3184.63	0.26735	3184.63	0.31283
3182.58	0.31812	3182.58	0.29359	3182.58	0.24161	3182.58	0.26419	3182.58	0.3103
3180.52	0.31491	3180.52	0.29037	3180.52	0.23877	3180.52	0.26125	3180.52	0.30722
3178.47	0.31138	3178.47	0.28727	3178.47	0.23565	3178.47	0.25832	3178.47	0.3043
3176.42	0.30793	3176.42	0.28442	3176.42	0.23243	3176.42	0.25515	3176.42	0.30177
3174.37	0.30502	3174.37	0.28149	3174.37	0.2295	3174.37	0.25174	3174.37	0.29923
3172.32	0.30245	3172.32	0.27812	3172.32	0.22662	3172.32	0.2482	3172.32	0.29649
3170.27	0.29924	3170.27	0.2745	3170.27	0.22352	3170.27	0.24475	3170.27	0.29344
3168.21	0.29539	3168.21	0.27111	3168.21	0.2205	3168.21	0.24155	3168.21	0.29009
3166.16	0.2916	3166.16	0.26819	3166.16	0.21772	3166.16	0.23862	3166.16	0.2868
3164.11	0.28798	3164.11	0.26524	3164.11	0.2149	3164.11	0.23553	3164.11	0.28367
3162.06	0.28474	3162.06	0.26147	3162.06	0.21178	3162.06	0.23199	3162.06	0.28049
3160.01	0.28182	3160.01	0.2574	3160.01	0.20843	3160.01	0.22871	3160.01	0.2773
3157.95	0.27869	3157.95	0.25408	3157.95	0.20514	3157.95	0.22607	3157.95	0.27435
3155.9	0.27515	3155.9	0.25101	3155.9	0.20189	3155.9	0.22344	3155.9	0.27145
3153.85	0.27128	3153.85	0.24743	3153.85	0.19864	3153.85	0.22024	3153.85	0.26825
3151.8	0.26745	3151.8	0.24387	3151.8	0.1957	3151.8	0.21632	3151.8	0.26463
3149.75	0.26395	3149.75	0.24058	3149.75	0.1929	3149.75	0.21216	3149.75	0.2609
3147.69	0.26054	3147.69	0.23707	3147.69	0.19005	3147.69	0.20863	3147.69	0.25777
3145.64	0.25697	3145.64	0.23327	3145.64	0.18729	3145.64	0.2058	3145.64	0.25495
3143.59	0.25318	3143.59	0.22939	3143.59	0.18437	3143.59	0.20289	3143.59	0.25155
3141.54	0.24926	3141.54	0.22561	3141.54	0.18115	3141.54	0.19954	3141.54	0.24806
3139.49	0.24549	3139.49	0.22218	3139.49	0.17782	3139.49	0.19626	3139.49	0.24506
3137.43	0.24213	3137.43	0.21893	3137.43	0.17448	3137.43	0.19319	3137.43	0.2421
3135.38	0.23892	3135.38	0.21581	3135.38	0.17142	3135.38	0.19009	3135.38	0.23886
3133.33	0.23547	3133.33	0.21271	3133.33	0.16875	3133.33	0.18692	3133.33	0.23539
3131.28	0.23192	3131.28	0.20951	3131.28	0.16608	3131.28	0.18372	3131.28	0.232
3129.23	0.22843	3129.23	0.20634	3129.23	0.16342	3129.23	0.18069	3129.23	0.22897
3127.17	0.22484	3127.17	0.20301	3127.17	0.16087	3127.17	0.17797	3127.17	0.22602
3125.12	0.22112	3125.12	0.19919	3125.12	0.15808	3125.12	0.17509	3125.12	0.22267
3123.07	0.21738	3123.07	0.19535	3123.07	0.15486	3123.07	0.17175	3123.07	0.21886
3121.02	0.21353	3121.02	0.19205	3121.02	0.15184	3121.02	0.16823	3121.02	0.21524
3118.97	0.20973	3118.97	0.18884	3118.97	0.1494	3118.97	0.16494	3118.97	0.2122
3116.91	0.20628	3116.91	0.18538	3116.91	0.14703	3116.91	0.162	3116.91	0.20916
3114.86	0.20306	3114.86	0.1821	3114.86	0.14429	3114.86	0.1595	3114.86	0.20595
3112.81	0.19993	3112.81	0.17913	3112.81	0.14142	3112.81	0.15736	3112.81	0.20288
3110.76	0.19671	3110.76	0.17608	3110.76	0.13889	3110.76	0.15495	3110.76	0.19998
3108.71	0.19322	3108.71	0.17284	3108.71	0.13659	3108.71	0.15192	3108.71	0.19719
3106.65	0.18973	3106.65	0.16968	3106.65	0.13414	3106.65	0.14868	3106.65	0.19425
3104.6	0.18636	3104.6	0.1666	3104.6	0.13173	3104.6	0.14583	3104.6	0.19115
3102.55	0.18297	3102.55	0.16346	3102.55	0.12943	3102.55	0.1434	3102.55	0.18796
3100.5	0.17963	3100.5	0.16045	3100.5	0.12701	3100.5	0.14088	3100.5	0.18479
3098.45	0.17658	3098.45	0.15765	3098.45	0.12455	3098.45	0.13803	3098.45	0.18175
3096.39	0.17374	3096.39	0.15479	3096.39	0.12231	3096.39	0.13516	3096.39	0.17867
3094.34	0.17074	3094.34	0.15174	3094.34	0.11997	3094.34	0.13248	3094.34	0.17546
3092.29	0.16749	3092.29	0.14883	3092.29	0.11743	3092.29	0.12991	3092.29	0.17241
3090.24	0.16431	3090.24	0.14627	3090.24	0.11517	3090.24	0.12768	3090.24	0.16978
3088.19	0.16138	3088.19	0.14381	3088.19	0.11322	3088.19	0.12557	3088.19	0.16734
3086.14	0.15853	3086.14	0.14119	3086.14	0.11125	3086.14	0.12326	3086.14	0.16472
3084.08	0.1556	3084.08	0.13838	3084.08	0.10921	3084.08	0.12092	3084.08	0.16188
3082.03	0.15258	3082.03	0.13555	3082.03	0.10708	3082.03	0.1187	3082.03	0.15905
3079.98	0.14954	3079.98	0.13298	3079.98	0.10497	3079.98	0.11661	3079.98	0.15645
3077.93	0.14675	3077.93	0.13084	3077.93	0.10303	3077.93	0.11462	3077.93	0.15419
3075.88	0.14433	3075.88	0.12875	3075.88	0.10116	3075.88	0.11249	3075.88	0.15195
3073.82	0.14186	3073.82	0.12614	3073.82	0.09929	3073.82	0.11019	3073.82	0.14943
3071.77	0.13897	3071.77	0.12338	3071.77	0.09734	3071.77	0.10796	3071.77	0.1469
3069.72	0.13598	3069.72	0.12097	3069.72	0.0953	3069.72	0.10587	3069.72	0.14469
3067.67	0.1334	3067.67	0.11867	3067.67	0.09332	3067.67	0.10384	3067.67	0.14246
3065.62	0.13113	3065.62	0.11636	3065.62	0.09152	3065.62	0.10197	3065.62	0.13984
3063.56	0.12892	3063.56	0.11414	3063.56	0.08981	3063.56	0.10006	3063.56	0.13708
3061.51	0.1266	3061.51	0.11198	3061.51	0.08798	3061.51	0.09779	3061.51	0.1345
3059.46	0.124	3059.46	0.10995	3059.46	0.08609	3059.46	0.09535	3059.46	0.13213
3057.41	0.12147	3057.41	0.10803	3057.41	0.08448	3057.41	0.09333	3057.41	0.12994
3055.36	0.11932	3055.36	0.10603	3055.36	0.08324	3055.36	0.09185	3055.36	0.12781
3053.3	0.11705	3053.3	0.1039	3053.3	0.08192	3053.3	0.09033	3053.3	0.12561
3051.25	0.11449	3051.25	0.10158	3051.25	0.08032	3051.25	0.0885	3051.25	0.12341
3049.2	0.1121	3049.2	0.09925	3049.2	0.07885	3049.2	0.08669	3049.2	0.12121
3047.15	0.11014	3047.15	0.09713	3047.15	0.07741	3047.15	0.08503	3047.15	0.11901
3045.1	0.10822	3045.1	0.09532	3045.1	0.07573	3045.1	0.0834	3045.1	0.11702
3043.04	0.1061	3043.04	0.09366	3043.04	0.07408	3043.04	0.08169	3043.04	0.11519
3040.99	0.10393	3040.99	0.09187	3040.99	0.07257	3040.99	0.07985	3040.99	0.11326
3038.94	0.10185	3038.94	0.08996	3038.94	0.071	3038.94	0.07803	3038.94	0.11128
3036.89	0.09987	3036.89	0.08814	3036.89	0.06933	3036.89	0.07641	3036.89	0.10925
3034.84	0.0979	3034.84	0.08648	3034.84	0.06783	3034.84	0.07493	3034.84	0.10718
3032.78	0.09583	3032.78	0.08482	3032.78	0.06664	3032.78	0.07362	3032.78	0.10528
3030.73	0.09385	3030.73	0.08316	3030.73	0.06551	3030.73	0.07257	3030.73	0.10361
3028.68	0.09212	3028.68	0.08155	3028.68	0.06439	3028.68	0.07162	3028.68	0.10206
3026.63	0.09032	3026.63	0.0799	3026.63	0.06327	3026.63	0.07045	3026.63	0.10034
3024.58	0.08833	3024.58	0.07822	3024.58	0.06201	3024.58	0.06885	3024.58	0.09827
3022.52	0.08659	3022.52	0.07671	3022.52	0.06069	3022.52	0.06714	3022.52	0.09629
3020.47	0.08513	3020.47	0.07528	3020.47	0.05944	3020.47	0.0658	3020.47	0.09466
3018.42	0.0835	3018.42	0.07386	3018.42	0.05829	3018.42	0.06471	3018.42	0.09305
3016.37	0.08166	3016.37	0.07255	3016.37	0.05717	3016.37	0.06344	3016.37	0.09135
3014.32	0.0799	3014.32	0.07121	3014.32	0.05606	3014.32	0.06203	3014.32	0.08984
3012.26	0.07826	3012.26	0.06973	3012.26	0.05502	3012.26	0.06069	3012.26	0.0884
3010.21	0.07679	3010.21	0.06829	3010.21	0.05404	3010.21	0.05953	3010.21	0.08682
3008.16	0.07547	3008.16	0.06688	3008.16	0.05306	3008.16	0.05848	3008.16	0.08526
3006.11	0.07409	3006.11	0.06545	3006.11	0.05209	3006.11	0.05732	3006.11	0.08382
3004.06	0.0726	3004.06	0.06402	3004.06	0.05099	3004.06	0.05608	3004.06	0.08235
3002.01	0.07109	3002.01	0.06259	3002.01	0.04968	3002.01	0.05496	3002.01	0.08079
2999.95	0.06955	2999.95	0.06127	2999.95	0.04847	2999.95	0.054	2999.95	0.07916
2997.9	0.06808	2997.9	0.06016	2997.9	0.04757	2997.9	0.05314	2997.9	0.07761
2995.85	0.06694	2995.85	0.05907	2995.85	0.04681	2995.85	0.05217	2995.85	0.07629
2993.8	0.06598	2993.8	0.05792	2993.8	0.04609	2993.8	0.05108	2993.8	0.07507
2991.75	0.06471	2991.75	0.05674	2991.75	0.0452	2991.75	0.04997	2991.75	0.07378
2989.69	0.06308	2989.69	0.05557	2989.69	0.0441	2989.69	0.04875	2989.69	0.07243
2987.64	0.06158	2987.64	0.05448	2987.64	0.04307	2987.64	0.04774	2987.64	0.0712
2985.59	0.06044	2985.59	0.05347	2985.59	0.04224	2985.59	0.04703	2985.59	0.07009
2983.54	0.05939	2983.54	0.05248	2983.54	0.04157	2983.54	0.04631	2983.54	0.06907
2981.49	0.05824	2981.49	0.05157	2981.49	0.04091	2981.49	0.04548	2981.49	0.06799
2979.43	0.05708	2979.43	0.05069	2979.43	0.04002	2979.43	0.04457	2979.43	0.06656
2977.38	0.05596	2977.38	0.04966	2977.38	0.03911	2977.38	0.04353	2977.38	0.06496
2975.33	0.05479	2975.33	0.04844	2975.33	0.03844	2975.33	0.04252	2975.33	0.06364
2973.28	0.05361	2973.28	0.04724	2973.28	0.0378	2973.28	0.04165	2973.28	0.06264
2971.23	0.05262	2971.23	0.04626	2971.23	0.03708	2971.23	0.04087	2971.23	0.06168
2969.17	0.0517	2969.17	0.04549	2969.17	0.03644	2969.17	0.04013	2969.17	0.06075
2967.12	0.0507	2967.12	0.04483	2967.12	0.0358	2967.12	0.03938	2967.12	0.05986
2965.07	0.04971	2965.07	0.04403	2965.07	0.03503	2965.07	0.03856	2965.07	0.05876
2963.02	0.04885	2963.02	0.04309	2963.02	0.03425	2963.02	0.03776	2963.02	0.05748
2960.97	0.04805	2960.97	0.0423	2960.97	0.03362	2960.97	0.03713	2960.97	0.05649
2958.91	0.04714	2958.91	0.04162	2958.91	0.0331	2958.91	0.03663	2958.91	0.05561
2956.86	0.04622	2956.86	0.04094	2956.86	0.03259	2956.86	0.03609	2956.86	0.05444
2954.81	0.04532	2954.81	0.04019	2954.81	0.03192	2954.81	0.03551	2954.81	0.05326
2952.76	0.04447	2952.76	0.03927	2952.76	0.03121	2952.76	0.03493	2952.76	0.05239
2950.71	0.04379	2950.71	0.03836	2950.71	0.03065	2950.71	0.03431	2950.71	0.05164
2948.65	0.04294	2948.65	0.0376	2948.65	0.02999	2948.65	0.03356	2948.65	0.05064
2946.6	0.04195	2946.6	0.03699	2946.6	0.02934	2946.6	0.03281	2946.6	0.04965
2944.55	0.04118	2944.55	0.03651	2944.55	0.02897	2944.55	0.03234	2944.55	0.049
2942.5	0.04041	2942.5	0.03597	2942.5	0.02855	2942.5	0.03198	2942.5	0.04837
2940.45	0.03955	2940.45	0.03515	2940.45	0.02787	2940.45	0.03141	2940.45	0.04754
2938.39	0.03876	2938.39	0.03431	2938.39	0.02721	2938.39	0.03067	2938.39	0.04666
2936.34	0.03813	2936.34	0.0337	2936.34	0.02671	2936.34	0.03004	2936.34	0.04577
2934.29	0.03758	2934.29	0.03321	2934.29	0.02621	2934.29	0.02951	2934.29	0.04489
2932.24	0.03705	2932.24	0.03264	2932.24	0.02571	2932.24	0.02891	2932.24	0.04411
2930.19	0.03652	2930.19	0.03202	2930.19	0.02525	2930.19	0.02821	2930.19	0.0435
2928.13	0.03571	2928.13	0.03135	2928.13	0.0247	2928.13	0.02755	2928.13	0.04287
2926.08	0.03471	2926.08	0.0306	2926.08	0.02415	2926.08	0.02706	2926.08	0.04195
2924.03	0.03396	2924.03	0.03	2924.03	0.02383	2924.03	0.02674	2924.03	0.04101
2921.98	0.03344	2921.98	0.02955	2921.98	0.02354	2921.98	0.02643	2921.98	0.04036
2919.93	0.0329	2919.93	0.02909	2919.93	0.02313	2919.93	0.026	2919.93	0.03985
2917.88	0.03226	2917.88	0.02855	2917.88	0.02279	2917.88	0.02545	2917.88	0.03932
2915.82	0.03165	2915.82	0.02797	2915.82	0.0225	2915.82	0.02487	2915.82	0.03864
2913.77	0.03121	2913.77	0.02745	2913.77	0.0221	2913.77	0.02434	2913.77	0.03779
2911.72	0.03074	2911.72	0.02692	2911.72	0.02156	2911.72	0.02385	2911.72	0.03698
2909.67	0.03004	2909.67	0.02627	2909.67	0.0209	2909.67	0.02345	2909.67	0.03625
2907.62	0.02918	2907.62	0.02571	2907.62	0.0203	2907.62	0.02306	2907.62	0.03552
2905.56	0.02851	2905.56	0.02536	2905.56	0.01995	2905.56	0.02265	2905.56	0.03478
2903.51	0.02815	2903.51	0.025	2903.51	0.01976	2903.51	0.02226	2903.51	0.03407
2901.46	0.02777	2901.46	0.02444	2901.46	0.01946	2901.46	0.02183	2901.46	0.03336
2899.41	0.02722	2899.41	0.02387	2899.41	0.01905	2899.41	0.02129	2899.41	0.03269
2897.36	0.02664	2897.36	0.0235	2897.36	0.01868	2897.36	0.02071	2897.36	0.03223
2895.3	0.02622	2895.3	0.02323	2895.3	0.01846	2895.3	0.02028	2895.3	0.0319
2893.25	0.02588	2893.25	0.02289	2893.25	0.01836	2893.25	0.02019	2893.25	0.03145
2891.2	0.02541	2891.2	0.02247	2891.2	0.01818	2891.2	0.02012	2891.2	0.0308
2889.15	0.02483	2889.15	0.02196	2889.15	0.01781	2889.15	0.01963	2889.15	0.03016
2887.1	0.02425	2887.1	0.02136	2887.1	0.01731	2887.1	0.01898	2887.1	0.0297
2885.04	0.02374	2885.04	0.02089	2885.04	0.01695	2885.04	0.01866	2885.04	0.02926
2882.99	0.02337	2882.99	0.02072	2882.99	0.01681	2882.99	0.01851	2882.99	0.02876
2880.94	0.02307	2880.94	0.02064	2880.94	0.01673	2880.94	0.01818	2880.94	0.02831
2878.89	0.02271	2878.89	0.02042	2878.89	0.01652	2878.89	0.01781	2878.89	0.02787
2876.84	0.02227	2876.84	0.02013	2876.84	0.01615	2876.84	0.01751	2876.84	0.02734
2874.78	0.02182	2874.78	0.01984	2874.78	0.0158	2874.78	0.01714	2874.78	0.02678
2872.73	0.02141	2872.73	0.01937	2872.73	0.01557	2872.73	0.01668	2872.73	0.02634
2870.68	0.02111	2870.68	0.01884	2870.68	0.01538	2870.68	0.01637	2870.68	0.02602
2868.63	0.02093	2868.63	0.01849	2868.63	0.01508	2868.63	0.01633	2868.63	0.02564
2866.58	0.02066	2866.58	0.0183	2866.58	0.01464	2866.58	0.01634	2866.58	0.02515
2864.52	0.02031	2864.52	0.01806	2864.52	0.01426	2864.52	0.01615	2864.52	0.02468
2862.47	0.01996	2862.47	0.01766	2862.47	0.01408	2862.47	0.01582	2862.47	0.02426
2860.42	0.01945	2860.42	0.01711	2860.42	0.01399	2860.42	0.01547	2860.42	0.02384
2858.37	0.01891	2858.37	0.01669	2858.37	0.01389	2858.37	0.01524	2858.37	0.02347
2856.32	0.01872	2856.32	0.01661	2856.32	0.01369	2856.32	0.01509	2856.32	0.02322
2854.26	0.01863	2854.26	0.01656	2854.26	0.01332	2854.26	0.01487	2854.26	0.02295
2852.21	0.01831	2852.21	0.01637	2852.21	0.01304	2852.21	0.01462	2852.21	0.0226
2850.16	0.018	2850.16	0.01619	2850.16	0.01302	2850.16	0.01444	2850.16	0.02228
2848.11	0.01782	2848.11	0.01601	2848.11	0.01304	2848.11	0.01426	2848.11	0.02198
2846.06	0.01755	2846.06	0.01564	2846.06	0.01287	2846.06	0.01398	2846.06	0.02147
2844	0.01717	2844	0.01514	2844	0.0124	2844	0.01371	2844	0.02079
2841.95	0.01678	2841.95	0.01477	2841.95	0.01193	2841.95	0.01348	2841.95	0.02026
2839.9	0.01636	2839.9	0.01454	2839.9	0.01172	2839.9	0.01319	2839.9	0.01998
2837.85	0.01603	2837.85	0.01442	2837.85	0.01176	2837.85	0.01296	2837.85	0.01988
2835.8	0.01591	2835.8	0.01442	2835.8	0.01181	2835.8	0.01293	2835.8	0.01984
2833.75	0.01586	2833.75	0.01437	2833.75	0.01167	2833.75	0.01282	2833.75	0.01971
2831.69	0.01571	2831.69	0.01412	2831.69	0.01137	2831.69	0.0126	2831.69	0.01944
2829.64	0.01547	2829.64	0.01379	2829.64	0.01111	2829.64	0.0124	2829.64	0.01902
2827.59	0.01515	2827.59	0.01355	2827.59	0.01091	2827.59	0.0122	2827.59	0.01852
2825.54	0.01478	2825.54	0.01343	2825.54	0.01082	2825.54	0.01199	2825.54	0.01814
2823.49	0.01453	2823.49	0.01326	2823.49	0.01071	2823.49	0.01176	2823.49	0.0179
2821.43	0.01431	2821.43	0.01287	2821.43	0.01045	2821.43	0.01151	2821.43	0.0176
2819.38	0.01389	2819.38	0.01244	2819.38	0.01011	2819.38	0.01124	2819.38	0.01712
2817.33	0.01348	2817.33	0.01223	2817.33	0.00979	2817.33	0.01085	2817.33	0.01671
2815.28	0.01335	2815.28	0.01224	2815.28	0.00964	2815.28	0.01056	2815.28	0.01666
2813.23	0.01341	2813.23	0.01222	2813.23	0.00978	2813.23	0.01062	2813.23	0.01671
2811.17	0.01338	2811.17	0.01206	2811.17	0.00986	2811.17	0.01081	2811.17	0.0165
2809.12	0.01328	2809.12	0.0118	2809.12	0.00961	2809.12	0.01077	2809.12	0.01613
2807.07	0.01319	2807.07	0.01156	2807.07	0.00931	2807.07	0.01047	2807.07	0.01583
2805.02	0.01298	2805.02	0.01142	2805.02	0.00921	2805.02	0.0102	2805.02	0.0157
2802.97	0.01254	2802.97	0.01134	2802.97	0.0092	2802.97	0.01005	2802.97	0.01554
2800.91	0.0122	2800.91	0.01128	2800.91	0.00919	2800.91	0.0099	2800.91	0.01529
2798.86	0.01211	2798.86	0.01122	2798.86	0.00912	2798.86	0.00976	2798.86	0.01497
2796.81	0.01196	2796.81	0.01113	2796.81	0.00891	2796.81	0.00961	2796.81	0.01461
2794.76	0.01174	2794.76	0.0109	2794.76	0.00867	2794.76	0.00942	2794.76	0.01434
2792.71	0.01169	2792.71	0.01055	2792.71	0.00853	2792.71	0.00931	2792.71	0.01423
2790.65	0.01171	2790.65	0.01021	2790.65	0.00845	2790.65	0.0093	2790.65	0.01422
2788.6	0.01158	2788.6	0.01007	2788.6	0.00841	2788.6	0.00927	2788.6	0.01417
2786.55	0.01132	2786.55	0.0101	2786.55	0.00836	2786.55	0.00905	2786.55	0.01389
2784.5	0.01113	2784.5	0.01015	2784.5	0.00827	2784.5	0.00883	2784.5	0.01351
2782.45	0.01108	2782.45	0.01009	2782.45	0.00815	2782.45	0.00887	2782.45	0.01333
2780.39	0.01105	2780.39	0.00988	2780.39	0.00801	2780.39	0.00891	2780.39	0.01327
2778.34	0.0109	2778.34	0.00962	2778.34	0.00792	2778.34	0.00868	2778.34	0.01311
2776.29	0.01067	2776.29	0.00941	2776.29	0.00785	2776.29	0.00833	2776.29	0.01278
2774.24	0.01054	2774.24	0.00925	2774.24	0.0078	2774.24	0.00817	2774.24	0.01244
2772.19	0.01058	2772.19	0.00922	2772.19	0.00778	2772.19	0.00828	2772.19	0.01233
2770.13	0.01056	2770.13	0.00928	2770.13	0.00779	2770.13	0.0084	2770.13	0.01236
2768.08	0.01041	2768.08	0.00933	2768.08	0.00776	2768.08	0.00845	2768.08	0.01249
2766.03	0.01034	2766.03	0.00925	2766.03	0.00767	2766.03	0.00841	2766.03	0.01257
2763.98	0.01038	2763.98	0.00921	2763.98	0.00755	2763.98	0.00832	2763.98	0.01243
2761.93	0.01029	2761.93	0.00923	2761.93	0.00748	2761.93	0.00835	2761.93	0.01219
2759.87	0.00992	2759.87	0.00906	2759.87	0.00741	2759.87	0.00834	2759.87	0.01197
2757.82	0.0095	2757.82	0.0087	2757.82	0.00719	2757.82	0.00809	2757.82	0.01171
2755.77	0.00928	2755.77	0.00838	2755.77	0.00694	2755.77	0.00783	2755.77	0.01148
2753.72	0.0092	2753.72	0.0082	2753.72	0.00686	2753.72	0.00773	2753.72	0.0114
2751.67	0.00915	2751.67	0.0082	2751.67	0.00687	2751.67	0.00763	2751.67	0.01145
2749.62	0.00913	2749.62	0.00829	2749.62	0.00682	2749.62	0.00751	2749.62	0.01141
2747.56	0.00916	2747.56	0.00827	2747.56	0.00671	2747.56	0.0074	2747.56	0.01122
2745.51	0.00923	2745.51	0.00816	2745.51	0.00675	2745.51	0.00729	2745.51	0.01108
2743.46	0.00919	2743.46	0.00805	2743.46	0.00686	2743.46	0.00727	2743.46	0.011
2741.41	0.00897	2741.41	0.00796	2741.41	0.00678	2741.41	0.00731	2741.41	0.01085
2739.36	0.0088	2739.36	0.00783	2739.36	0.00661	2739.36	0.00725	2739.36	0.01075
2737.3	0.00878	2737.3	0.00771	2737.3	0.00651	2737.3	0.00714	2737.3	0.0107
2735.25	0.00863	2735.25	0.00772	2735.25	0.00642	2735.25	0.00707	2735.25	0.01051
2733.2	0.00837	2733.2	0.0078	2733.2	0.00627	2733.2	0.00705	2733.2	0.01027
2731.15	0.00825	2731.15	0.0078	2731.15	0.00603	2731.15	0.00694	2731.15	0.00999
2729.1	0.00829	2729.1	0.0077	2729.1	0.00581	2729.1	0.00676	2729.1	0.00965
2727.04	0.00838	2727.04	0.00755	2727.04	0.00583	2727.04	0.00671	2727.04	0.00951
2724.99	0.00839	2724.99	0.00732	2724.99	0.00601	2724.99	0.00668	2724.99	0.00958
2722.94	0.00829	2722.94	0.00713	2722.94	0.00597	2722.94	0.00655	2722.94	0.00956
2720.89	0.00816	2720.89	0.00713	2720.89	0.00577	2720.89	0.00642	2720.89	0.00939
2718.84	0.00808	2718.84	0.00734	2718.84	0.00571	2718.84	0.00638	2718.84	0.00926
2716.78	0.00802	2716.78	0.00749	2716.78	0.00563	2716.78	0.00636	2716.78	0.00917
2714.73	0.00787	2714.73	0.00737	2714.73	0.00535	2714.73	0.00633	2714.73	0.0091
2712.68	0.00767	2712.68	0.00713	2712.68	0.0052	2712.68	0.00631	2712.68	0.00914
2710.63	0.00752	2710.63	0.00695	2710.63	0.00538	2710.63	0.00622	2710.63	0.00924
2708.58	0.00738	2708.58	0.00687	2708.58	0.0055	2708.58	0.00609	2708.58	0.00923
2706.52	0.00738	2706.52	0.00686	2706.52	0.00539	2706.52	0.00609	2706.52	0.00902
2704.47	0.00757	2704.47	0.00684	2704.47	0.00518	2704.47	0.0062	2704.47	0.00875
2702.42	0.00768	2702.42	0.00683	2702.42	0.00513	2702.42	0.0062	2702.42	0.00872
2700.37	0.00756	2700.37	0.00689	2700.37	0.00533	2700.37	0.00612	2700.37	0.00892
2698.32	0.00739	2698.32	0.0069	2698.32	0.0055	2698.32	0.0061	2698.32	0.00902
2696.26	0.00732	2696.26	0.00679	2696.26	0.00543	2696.26	0.00601	2696.26	0.00885
2694.21	0.00736	2694.21	0.00673	2694.21	0.00527	2694.21	0.006	2694.21	0.00859
2692.16	0.00736	2692.16	0.0068	2692.16	0.00517	2692.16	0.00611	2692.16	0.00852
2690.11	0.00729	2690.11	0.00693	2690.11	0.00512	2690.11	0.006	2690.11	0.0086
2688.06	0.00726	2688.06	0.00697	2688.06	0.00505	2688.06	0.00581	2688.06	0.00862
2686	0.00727	2686	0.00688	2686	0.00496	2686	0.00571	2686	0.00845
2683.95	0.00727	2683.95	0.00668	2683.95	0.00494	2683.95	0.00559	2683.95	0.00823
2681.9	0.00724	2681.9	0.0065	2681.9	0.00505	2681.9	0.00559	2681.9	0.0081
2679.85	0.00716	2679.85	0.00641	2679.85	0.00519	2679.85	0.00573	2679.85	0.00809
2677.8	0.00704	2677.8	0.00637	2677.8	0.00512	2677.8	0.00573	2677.8	0.00808
2675.74	0.00695	2675.74	0.00631	2675.74	0.00498	2675.74	0.00559	2675.74	0.00807
2673.69	0.00689	2673.69	0.00633	2673.69	0.00508	2673.69	0.00565	2673.69	0.00817
2671.64	0.00684	2671.64	0.00648	2671.64	0.00528	2671.64	0.00587	2671.64	0.00824
2669.59	0.00675	2669.59	0.00655	2669.59	0.00524	2669.59	0.00588	2669.59	0.00807
2667.54	0.00669	2667.54	0.00643	2667.54	0.00506	2667.54	0.00573	2667.54	0.00783
2665.49	0.00672	2665.49	0.00624	2665.49	0.00501	2665.49	0.00574	2665.49	0.0078
2663.43	0.00675	2663.43	0.00613	2663.43	0.00502	2663.43	0.00581	2663.43	0.00791
2661.38	0.00673	2661.38	0.00616	2661.38	0.00494	2661.38	0.00571	2661.38	0.00785
2659.33	0.00669	2659.33	0.0062	2659.33	0.00489	2659.33	0.00559	2659.33	0.00775
2657.28	0.00667	2657.28	0.00624	2657.28	0.00491	2657.28	0.00571	2657.28	0.00784
2655.23	0.00673	2655.23	0.0063	2655.23	0.00502	2655.23	0.00588	2655.23	0.00783
2653.17	0.00671	2653.17	0.00623	2653.17	0.00517	2653.17	0.0058	2653.17	0.00754
2651.12	0.00655	2651.12	0.00604	2651.12	0.00519	2651.12	0.00558	2651.12	0.00719
2649.07	0.00643	2649.07	0.00595	2649.07	0.00502	2649.07	0.00543	2649.07	0.00696
2647.02	0.00652	2647.02	0.00595	2647.02	0.00474	2647.02	0.00533	2647.02	0.00689
2644.97	0.00661	2644.97	0.00589	2644.97	0.00455	2644.97	0.00519	2644.97	0.00702
2642.91	0.00647	2642.91	0.00584	2642.91	0.00458	2642.91	0.0051	2642.91	0.00718
2640.86	0.00629	2640.86	0.00596	2640.86	0.00476	2640.86	0.00517	2640.86	0.00716
2638.81	0.00622	2638.81	0.00606	2638.81	0.00477	2638.81	0.00522	2638.81	0.00706
2636.76	0.00622	2636.76	0.00605	2636.76	0.00455	2636.76	0.00524	2636.76	0.00708
2634.71	0.0062	2634.71	0.00591	2634.71	0.00434	2634.71	0.00528	2634.71	0.00717
2632.65	0.00609	2632.65	0.0056	2632.65	0.00425	2632.65	0.00521	2632.65	0.00713
2630.6	0.0061	2630.6	0.00539	2630.6	0.00441	2630.6	0.00511	2630.6	0.00704
2628.55	0.00629	2628.55	0.00548	2628.55	0.00465	2628.55	0.00501	2628.55	0.00706
2626.5	0.00649	2626.5	0.00569	2626.5	0.00459	2626.5	0.00499	2626.5	0.00713
2624.45	0.00658	2624.45	0.00588	2624.45	0.00458	2624.45	0.00515	2624.45	0.0072
2622.39	0.00644	2622.39	0.00591	2622.39	0.00477	2622.39	0.00531	2622.39	0.00717
2620.34	0.00617	2620.34	0.00575	2620.34	0.00482	2620.34	0.00535	2620.34	0.00705
2618.29	0.00597	2618.29	0.00565	2618.29	0.00467	2618.29	0.00535	2618.29	0.007
2616.24	0.00594	2616.24	0.00563	2616.24	0.00454	2616.24	0.00529	2616.24	0.00698
2614.19	0.00596	2614.19	0.00565	2614.19	0.00445	2614.19	0.00524	2614.19	0.00698
2612.13	0.00607	2612.13	0.00565	2612.13	0.00434	2612.13	0.00516	2612.13	0.00694
2610.08	0.00624	2610.08	0.00566	2610.08	0.00434	2610.08	0.00508	2610.08	0.00684
2608.03	0.00623	2608.03	0.00579	2608.03	0.0046	2608.03	0.00524	2608.03	0.00691
2605.98	0.00613	2605.98	0.00588	2605.98	0.00485	2605.98	0.00557	2605.98	0.00703
2603.93	0.00622	2603.93	0.00587	2603.93	0.00487	2603.93	0.00581	2603.93	0.00705
2601.87	0.00647	2601.87	0.00591	2601.87	0.00495	2601.87	0.00583	2601.87	0.00709
2599.82	0.00667	2599.82	0.0059	2599.82	0.00494	2599.82	0.00555	2599.82	0.00705
2597.77	0.0066	2597.77	0.00575	2597.77	0.00463	2597.77	0.00512	2597.77	0.00691
2595.72	0.00625	2595.72	0.00565	2595.72	0.00447	2595.72	0.00492	2595.72	0.00688
2593.67	0.00607	2593.67	0.00569	2593.67	0.00452	2593.67	0.00499	2593.67	0.00689
2591.61	0.00628	2591.61	0.00581	2591.61	0.00459	2591.61	0.00499	2591.61	0.00688
2589.56	0.00659	2589.56	0.00597	2589.56	0.00474	2589.56	0.0049	2589.56	0.007
2587.51	0.00674	2587.51	0.00607	2587.51	0.00498	2587.51	0.00506	2587.51	0.00715
2585.46	0.00662	2585.46	0.00605	2585.46	0.00522	2585.46	0.00528	2585.46	0.0072
2583.41	0.00636	2583.41	0.00608	2583.41	0.00534	2583.41	0.00515	2583.41	0.0072
2581.36	0.00619	2581.36	0.0061	2581.36	0.0052	2581.36	0.00494	2581.36	0.00711
2579.3	0.0062	2579.3	0.00607	2579.3	0.00504	2579.3	0.00485	2579.3	0.00698
2577.25	0.00636	2577.25	0.00619	2577.25	0.00512	2577.25	0.00474	2577.25	0.00698
2575.2	0.00643	2575.2	0.00619	2575.2	0.00514	2575.2	0.00477	2575.2	0.0069
2573.15	0.00652	2573.15	0.00596	2573.15	0.00502	2573.15	0.005	2573.15	0.00683
2571.1	0.00674	2571.1	0.00585	2571.1	0.00497	2571.1	0.00519	2571.1	0.00699
2569.04	0.00687	2569.04	0.00593	2569.04	0.00494	2569.04	0.00524	2569.04	0.0072
2566.99	0.00675	2566.99	0.00604	2566.99	0.00486	2566.99	0.00517	2566.99	0.00732
2564.94	0.00654	2564.94	0.00605	2564.94	0.00503	2564.94	0.00511	2564.94	0.00732
2562.89	0.00642	2562.89	0.00603	2562.89	0.00541	2562.89	0.00509	2562.89	0.00708
2560.84	0.0064	2560.84	0.00619	2560.84	0.00564	2560.84	0.00514	2560.84	0.00682
2558.78	0.00655	2558.78	0.00633	2558.78	0.00563	2558.78	0.00544	2558.78	0.00689
2556.73	0.00674	2556.73	0.00618	2556.73	0.00535	2556.73	0.00559	2556.73	0.00693
2554.68	0.00658	2554.68	0.00598	2554.68	0.00501	2554.68	0.00521	2554.68	0.00661
2552.63	0.00636	2552.63	0.00595	2552.63	0.00497	2552.63	0.00498	2552.63	0.00644
2550.58	0.00645	2550.58	0.00599	2550.58	0.00523	2550.58	0.00513	2550.58	0.00673
2548.52	0.00656	2548.52	0.00601	2548.52	0.00541	2548.52	0.00519	2548.52	0.00697
2546.47	0.00652	2546.47	0.00613	2546.47	0.0054	2546.47	0.00503	2546.47	0.00695
2544.42	0.00652	2544.42	0.00646	2544.42	0.00545	2544.42	0.00499	2544.42	0.00704
2542.37	0.00664	2542.37	0.00671	2542.37	0.00556	2542.37	0.00526	2542.37	0.00717
2540.32	0.00666	2540.32	0.00646	2540.32	0.00543	2540.32	0.00537	2540.32	0.00708
2538.26	0.00658	2538.26	0.00602	2538.26	0.00507	2538.26	0.00508	2538.26	0.00707
2536.21	0.0067	2536.21	0.0059	2536.21	0.00498	2536.21	0.00487	2536.21	0.00728
2534.16	0.00689	2534.16	0.00604	2534.16	0.00527	2534.16	0.00484	2534.16	0.00738
2532.11	0.00694	2532.11	0.00618	2532.11	0.00555	2532.11	0.00499	2532.11	0.00729
2530.06	0.00696	2530.06	0.00614	2530.06	0.00555	2530.06	0.00541	2530.06	0.00715
2528	0.00698	2528	0.00603	2528	0.00533	2528	0.0055	2528	0.00709
2525.95	0.00692	2525.95	0.00617	2525.95	0.00513	2525.95	0.00499	2525.95	0.00711
2523.9	0.00687	2523.9	0.00658	2523.9	0.00504	2523.9	0.00461	2523.9	0.00717
2521.85	0.00685	2521.85	0.00694	2521.85	0.00521	2521.85	0.00478	2521.85	0.00749
2519.8	0.00686	2519.8	0.00691	2519.8	0.00554	2519.8	0.00518	2519.8	0.00782
2517.74	0.00708	2517.74	0.00667	2517.74	0.00572	2517.74	0.00535	2517.74	0.00771
2515.69	0.00744	2515.69	0.0067	2515.69	0.00577	2515.69	0.00526	2515.69	0.00748
2513.64	0.0077	2513.64	0.00693	2513.64	0.00576	2513.64	0.00515	2513.64	0.00751
2511.59	0.00781	2511.59	0.00699	2511.59	0.00548	2511.59	0.00514	2511.59	0.00762
2509.54	0.0079	2509.54	0.00697	2509.54	0.00513	2509.54	0.00516	2509.54	0.00757
2507.48	0.00789	2507.48	0.00697	2507.48	0.00519	2507.48	0.00531	2507.48	0.00752
2505.43	0.00768	2505.43	0.00694	2505.43	0.00552	2505.43	0.00581	2505.43	0.00768
2503.38	0.00751	2503.38	0.00691	2503.38	0.00569	2503.38	0.00631	2503.38	0.008
2501.33	0.0075	2501.33	0.00689	2501.33	0.00568	2501.33	0.00638	2501.33	0.00821
2499.28	0.00758	2499.28	0.00676	2499.28	0.00559	2499.28	0.00618	2499.28	0.0082
2497.23	0.00775	2497.23	0.00676	2497.23	0.00562	2497.23	0.00614	2497.23	0.00837
2495.17	0.00788	2495.17	0.00725	2495.17	0.00596	2495.17	0.00626	2495.17	0.0088
2493.12	0.0079	2493.12	0.00794	2493.12	0.00638	2493.12	0.00629	2493.12	0.00904
2491.07	0.0078	2491.07	0.00811	2491.07	0.00644	2491.07	0.00624	2491.07	0.00888
2489.02	0.00757	2489.02	0.00775	2489.02	0.00625	2489.02	0.0064	2489.02	0.00856
2486.97	0.0076	2486.97	0.00748	2486.97	0.00612	2486.97	0.00672	2486.97	0.00855
2484.91	0.00786	2484.91	0.00745	2484.91	0.0061	2484.91	0.00681	2484.91	0.00881
2482.86	0.00804	2482.86	0.00737	2482.86	0.00613	2482.86	0.00682	2482.86	0.00889
2480.81	0.00825	2480.81	0.00717	2480.81	0.00606	2480.81	0.00702	2480.81	0.00874
2478.76	0.00848	2478.76	0.00707	2478.76	0.00589	2478.76	0.00705	2478.76	0.00854
2476.71	0.00847	2476.71	0.00721	2476.71	0.0058	2476.71	0.00669	2476.71	0.00832
2474.65	0.00814	2474.65	0.00722	2474.65	0.00573	2474.65	0.00623	2474.65	0.00812
2472.6	0.00774	2472.6	0.00707	2472.6	0.00579	2472.6	0.00596	2472.6	0.00801
2470.55	0.0076	2470.55	0.00719	2470.55	0.00615	2470.55	0.006	2470.55	0.00821
2468.5	0.00783	2468.5	0.0075	2468.5	0.0065	2468.5	0.00631	2468.5	0.00871
2466.45	0.00822	2466.45	0.00763	2466.45	0.00658	2466.45	0.00653	2466.45	0.00903
2464.39	0.00839	2464.39	0.00771	2464.39	0.00645	2464.39	0.00662	2464.39	0.00904
2462.34	0.00824	2462.34	0.00774	2462.34	0.00624	2462.34	0.00679	2462.34	0.00899
2460.29	0.00805	2460.29	0.00763	2460.29	0.00601	2460.29	0.00693	2460.29	0.009
2458.24	0.00804	2458.24	0.00763	2458.24	0.00607	2458.24	0.00679	2458.24	0.00903
2456.19	0.00831	2456.19	0.00787	2456.19	0.00645	2456.19	0.00674	2456.19	0.00904
2454.13	0.00858	2454.13	0.00809	2454.13	0.0065	2454.13	0.00705	2454.13	0.00895
2452.08	0.00858	2452.08	0.00803	2452.08	0.0063	2452.08	0.00715	2452.08	0.00874
2450.03	0.00858	2450.03	0.00779	2450.03	0.0063	2450.03	0.00689	2450.03	0.00874
2447.98	0.00866	2447.98	0.00766	2447.98	0.0063	2447.98	0.0068	2447.98	0.00915
2445.93	0.00871	2445.93	0.00784	2445.93	0.00636	2445.93	0.00702	2445.93	0.00974
2443.87	0.00892	2443.87	0.00811	2443.87	0.0066	2443.87	0.00727	2443.87	0.01016
2441.82	0.00909	2441.82	0.00812	2441.82	0.00674	2441.82	0.00718	2441.82	0.00999
2439.77	0.00899	2439.77	0.00799	2439.77	0.00665	2439.77	0.0068	2439.77	0.00952
2437.72	0.00903	2437.72	0.00813	2437.72	0.00661	2437.72	0.00674	2437.72	0.00943
2435.67	0.00938	2435.67	0.0083	2435.67	0.00681	2435.67	0.00716	2435.67	0.00956
2433.61	0.00969	2433.61	0.00839	2433.61	0.00692	2433.61	0.00743	2433.61	0.00975
2431.56	0.00979	2431.56	0.00861	2431.56	0.00686	2431.56	0.0074	2431.56	0.01018
2429.51	0.00961	2429.51	0.0087	2429.51	0.00691	2429.51	0.0074	2429.51	0.01042
2427.46	0.00934	2427.46	0.00842	2427.46	0.00708	2427.46	0.0075	2427.46	0.01027
2425.41	0.00937	2425.41	0.0083	2425.41	0.00716	2425.41	0.00777	2425.41	0.01019
2423.35	0.00969	2423.35	0.00875	2423.35	0.00715	2423.35	0.00822	2423.35	0.0104
2421.3	0.00995	2421.3	0.00922	2421.3	0.00714	2421.3	0.0086	2421.3	0.0107
2419.25	0.00997	2419.25	0.00922	2419.25	0.0072	2419.25	0.00854	2419.25	0.01077
2417.2	0.00989	2417.2	0.00912	2417.2	0.00735	2417.2	0.00827	2417.2	0.01047
2415.15	0.00982	2415.15	0.00938	2415.15	0.00746	2415.15	0.00844	2415.15	0.01022
2413.1	0.00981	2413.1	0.00983	2413.1	0.00741	2413.1	0.00886	2413.1	0.01038
2411.04	0.00996	2411.04	0.01009	2411.04	0.00742	2411.04	0.00898	2411.04	0.01066
2408.99	0.01008	2408.99	0.01001	2408.99	0.00762	2408.99	0.00869	2408.99	0.01075
2406.94	0.01011	2406.94	0.0099	2406.94	0.00779	2406.94	0.00841	2406.94	0.0108
2404.89	0.0102	2404.89	0.00985	2404.89	0.00789	2404.89	0.00846	2404.89	0.01096
2402.84	0.01024	2402.84	0.00953	2402.84	0.00787	2402.84	0.0086	2402.84	0.011
2400.78	0.01019	2400.78	0.00927	2400.78	0.00769	2400.78	0.00871	2400.78	0.01077
2398.73	0.01018	2398.73	0.0093	2398.73	0.00751	2398.73	0.00888	2398.73	0.01054
2396.68	0.01027	2396.68	0.00926	2396.68	0.0075	2396.68	0.00903	2396.68	0.0105
2394.63	0.01036	2394.63	0.00908	2394.63	0.00775	2394.63	0.0091	2394.63	0.01055
2392.58	0.01048	2392.58	0.00908	2392.58	0.00805	2392.58	0.00908	2392.58	0.01048
2390.52	0.01066	2390.52	0.00937	2390.52	0.00805	2390.52	0.009	2390.52	0.0105
2388.47	0.01086	2388.47	0.00982	2388.47	0.00795	2388.47	0.00902	2388.47	0.01087
2386.42	0.011	2386.42	0.01015	2386.42	0.0081	2386.42	0.00924	2386.42	0.01128
2384.37	0.01099	2384.37	0.01012	2384.37	0.00836	2384.37	0.00952	2384.37	0.0115
2382.32	0.01087	2382.32	0.00997	2382.32	0.00842	2382.32	0.00959	2382.32	0.01158
2380.26	0.01086	2380.26	0.01001	2380.26	0.00837	2380.26	0.00953	2380.26	0.01158
2378.21	0.01091	2378.21	0.01001	2378.21	0.00837	2378.21	0.0095	2378.21	0.01159
2376.16	0.01094	2376.16	0.00998	2376.16	0.00838	2376.16	0.00942	2376.16	0.0116
2374.11	0.01103	2374.11	0.00997	2374.11	0.0081	2374.11	0.00919	2374.11	0.01136
2372.06	0.01104	2372.06	0.00981	2372.06	0.00753	2372.06	0.00889	2372.06	0.01109
2370	0.01091	2370	0.00979	2370	0.00736	2370	0.00873	2370	0.01133
2367.95	0.01085	2367.95	0.01002	2367.95	0.00774	2367.95	0.00872	2367.95	0.01187
2365.9	0.01101	2365.9	0.01037	2365.9	0.00816	2365.9	0.00906	2365.9	0.01222
2363.85	0.01123	2363.85	0.0104	2363.85	0.00857	2363.85	0.0096	2363.85	0.01226
2361.8	0.01137	2361.8	0.00996	2361.8	0.00884	2361.8	0.00981	2361.8	0.0122
2359.74	0.01164	2359.74	0.00991	2359.74	0.00869	2359.74	0.00968	2359.74	0.01216
2357.69	0.01198	2357.69	0.01055	2357.69	0.0087	2357.69	0.00963	2357.69	0.0122
2355.64	0.01206	2355.64	0.01123	2355.64	0.00912	2355.64	0.00995	2355.64	0.01247
2353.59	0.01197	2353.59	0.01148	2353.59	0.00945	2353.59	0.01032	2353.59	0.01274
2351.54	0.0121	2351.54	0.01148	2351.54	0.00976	2351.54	0.01038	2351.54	0.01287
2349.48	0.0124	2349.48	0.01157	2349.48	0.01002	2349.48	0.01036	2349.48	0.01298
2347.43	0.01262	2347.43	0.01171	2347.43	0.01	2347.43	0.01045	2347.43	0.01292
2345.38	0.01258	2345.38	0.01182	2345.38	0.00985	2345.38	0.01047	2345.38	0.01275
2343.33	0.01244	2343.33	0.01187	2343.33	0.01	2343.33	0.01038	2343.33	0.01284
2341.28	0.01254	2341.28	0.01171	2341.28	0.01044	2341.28	0.0105	2341.28	0.01319
2339.22	0.01251	2339.22	0.01141	2339.22	0.01067	2339.22	0.01078	2339.22	0.01338
2337.17	0.01214	2337.17	0.0113	2337.17	0.01056	2337.17	0.01083	2337.17	0.01335
2335.12	0.01208	2335.12	0.01155	2335.12	0.01041	2335.12	0.01082	2335.12	0.0136
2333.07	0.01246	2333.07	0.01194	2333.07	0.01038	2333.07	0.01101	2333.07	0.01376
2331.02	0.01262	2331.02	0.0119	2331.02	0.01032	2331.02	0.01101	2331.02	0.01329
2328.97	0.01261	2328.97	0.01175	2328.97	0.01024	2328.97	0.01091	2328.97	0.01298
2326.91	0.01295	2326.91	0.01218	2326.91	0.01038	2326.91	0.01108	2326.91	0.01329
2324.86	0.01339	2324.86	0.01277	2324.86	0.0105	2324.86	0.01125	2324.86	0.01368
2322.81	0.0135	2322.81	0.01296	2322.81	0.01051	2322.81	0.01141	2322.81	0.01401
2320.76	0.01345	2320.76	0.01293	2320.76	0.01077	2320.76	0.01168	2320.76	0.01427
2318.71	0.01343	2318.71	0.01267	2318.71	0.01094	2318.71	0.01181	2318.71	0.01441
2316.65	0.0135	2316.65	0.01247	2316.65	0.01074	2316.65	0.01203	2316.65	0.01464
2314.6	0.01364	2314.6	0.01262	2314.6	0.01073	2314.6	0.01223	2314.6	0.01488
2312.55	0.01387	2312.55	0.01287	2312.55	0.01097	2312.55	0.01213	2312.55	0.01502
2310.5	0.01413	2310.5	0.01309	2310.5	0.0111	2310.5	0.01219	2310.5	0.01509
2308.45	0.0142	2308.45	0.01333	2308.45	0.01119	2308.45	0.01251	2308.45	0.01502
2306.39	0.01409	2306.39	0.01342	2306.39	0.0111	2306.39	0.01269	2306.39	0.01468
2304.34	0.0141	2304.34	0.01336	2304.34	0.01098	2304.34	0.01288	2304.34	0.01447
2302.29	0.01437	2302.29	0.01336	2302.29	0.01105	2302.29	0.01315	2302.29	0.01475
2300.24	0.0147	2300.24	0.01363	2300.24	0.01095	2300.24	0.01321	2300.24	0.01499
2298.19	0.01482	2298.19	0.01383	2298.19	0.01089	2298.19	0.01302	2298.19	0.015
2296.13	0.01464	2296.13	0.01375	2296.13	0.01125	2296.13	0.01279	2296.13	0.0151
2294.08	0.01437	2294.08	0.01364	2294.08	0.01165	2294.08	0.01282	2294.08	0.01517
2292.03	0.0143	2292.03	0.01347	2292.03	0.01165	2292.03	0.0131	2292.03	0.01519
2289.98	0.01434	2289.98	0.01325	2289.98	0.01131	2289.98	0.0133	2289.98	0.01546
2287.93	0.01453	2287.93	0.01325	2287.93	0.01111	2287.93	0.01342	2287.93	0.01584
2285.87	0.01482	2285.87	0.01356	2285.87	0.0114	2285.87	0.01357	2285.87	0.01597
2283.82	0.01493	2283.82	0.01413	2283.82	0.01186	2283.82	0.01367	2283.82	0.0161
2281.77	0.01498	2281.77	0.01451	2281.77	0.01174	2281.77	0.0135	2281.77	0.01639
2279.72	0.01513	2279.72	0.01452	2279.72	0.01123	2279.72	0.01341	2279.72	0.01648
2277.67	0.01544	2277.67	0.01447	2277.67	0.01134	2277.67	0.01382	2277.67	0.01656
2275.61	0.01572	2275.61	0.01459	2275.61	0.01202	2275.61	0.01414	2275.61	0.01661
2273.56	0.01545	2273.56	0.01496	2273.56	0.01236	2273.56	0.01388	2273.56	0.01616
2271.51	0.0148	2271.51	0.0152	2271.51	0.01215	2271.51	0.01341	2271.51	0.0156
2269.46	0.01465	2269.46	0.01473	2269.46	0.01187	2269.46	0.01307	2269.46	0.0156
2267.41	0.01499	2267.41	0.01408	2267.41	0.01205	2267.41	0.01332	2267.41	0.0161
2265.35	0.01534	2265.35	0.01412	2265.35	0.01275	2265.35	0.01425	2265.35	0.01668
2263.3	0.01577	2263.3	0.01458	2263.3	0.01337	2263.3	0.01479	2263.3	0.01697
2261.25	0.01622	2261.25	0.01479	2261.25	0.01363	2261.25	0.01441	2261.25	0.01706
2259.2	0.01637	2259.2	0.01517	2259.2	0.01367	2259.2	0.01396	2259.2	0.01743
2257.15	0.01636	2257.15	0.01581	2257.15	0.01343	2257.15	0.014	2257.15	0.01778
2255.09	0.01646	2255.09	0.01593	2255.09	0.01323	2255.09	0.01455	2255.09	0.01771
2253.04	0.01639	2253.04	0.01563	2253.04	0.01335	2253.04	0.0153	2253.04	0.01765
2250.99	0.01601	2250.99	0.01549	2250.99	0.01348	2250.99	0.01564	2250.99	0.01755
2248.94	0.01591	2248.94	0.01567	2248.94	0.01361	2248.94	0.01564	2248.94	0.01714
2246.89	0.0162	2246.89	0.016	2246.89	0.0138	2246.89	0.01584	2246.89	0.01673
2244.84	0.01645	2244.84	0.01599	2244.84	0.01353	2244.84	0.01601	2244.84	0.01673
2242.78	0.01663	2242.78	0.01577	2242.78	0.01296	2242.78	0.01587	2242.78	0.01712
2240.73	0.01681	2240.73	0.01604	2240.73	0.01285	2240.73	0.01595	2240.73	0.01765
2238.68	0.01711	2238.68	0.01649	2238.68	0.01345	2238.68	0.01627	2238.68	0.01837
2236.63	0.01757	2236.63	0.01668	2236.63	0.01423	2236.63	0.01619	2236.63	0.01876
2234.58	0.01762	2234.58	0.01681	2234.58	0.0145	2234.58	0.01572	2234.58	0.01823
2232.52	0.01715	2232.52	0.01667	2232.52	0.01439	2232.52	0.01511	2232.52	0.01743
2230.47	0.01687	2230.47	0.01625	2230.47	0.01432	2230.47	0.01468	2230.47	0.01735
2228.42	0.01684	2228.42	0.01599	2228.42	0.0144	2228.42	0.01459	2228.42	0.01788
2226.37	0.01648	2226.37	0.01596	2226.37	0.01459	2226.37	0.01475	2226.37	0.01837
2224.32	0.01605	2224.32	0.01593	2224.32	0.01493	2224.32	0.01531	2224.32	0.01877
2222.26	0.01619	2222.26	0.01605	2222.26	0.01541	2222.26	0.01598	2222.26	0.01938
2220.21	0.0168	2220.21	0.0164	2220.21	0.0156	2220.21	0.01646	2220.21	0.01977
2218.16	0.01722	2218.16	0.01656	2218.16	0.01518	2218.16	0.01674	2218.16	0.01948
2216.11	0.01675	2216.11	0.01625	2216.11	0.01449	2216.11	0.01613	2216.11	0.01852
2214.06	0.01576	2214.06	0.01613	2214.06	0.01417	2214.06	0.01516	2214.06	0.01791
2212	0.01545	2212	0.01689	2212	0.0145	2212	0.01524	2212	0.01859
2209.95	0.01582	2209.95	0.01764	2209.95	0.01488	2209.95	0.01583	2209.95	0.01938
2207.9	0.01618	2207.9	0.01755	2207.9	0.01472	2207.9	0.01585	2207.9	0.0192
2205.85	0.01637	2205.85	0.01734	2205.85	0.01457	2205.85	0.01562	2205.85	0.01907
2203.8	0.01659	2203.8	0.01751	2203.8	0.01489	2203.8	0.01578	2203.8	0.01959
2201.74	0.01698	2201.74	0.01761	2201.74	0.01482	2201.74	0.01626	2201.74	0.01979
2199.69	0.01708	2199.69	0.01764	2199.69	0.01421	2199.69	0.01661	2199.69	0.0195
2197.64	0.01739	2197.64	0.01839	2197.64	0.01439	2197.64	0.01693	2197.64	0.01999
2195.59	0.01817	2195.59	0.01954	2195.59	0.015	2195.59	0.01713	2195.59	0.021
2193.54	0.01807	2193.54	0.0198	2193.54	0.01495	2193.54	0.01694	2193.54	0.02107
2191.48	0.0171	2191.48	0.01924	2191.48	0.01499	2191.48	0.01682	2191.48	0.02004
2189.43	0.01655	2189.43	0.01886	2189.43	0.01547	2189.43	0.01723	2189.43	0.01892
2187.38	0.01727	2187.38	0.01893	2187.38	0.01601	2187.38	0.01772	2187.38	0.01912
2185.33	0.01857	2185.33	0.019	2185.33	0.01657	2185.33	0.01733	2185.33	0.02031
2183.28	0.01941	2183.28	0.01883	2183.28	0.01671	2183.28	0.01651	2183.28	0.02034
2181.22	0.02007	2181.22	0.01876	2181.22	0.0163	2181.22	0.01689	2181.22	0.01962
2179.17	0.01999	2179.17	0.01879	2179.17	0.01577	2179.17	0.01791	2179.17	0.01986
2177.12	0.01916	2177.12	0.01884	2177.12	0.01561	2177.12	0.01783	2177.12	0.02066
2175.07	0.01895	2175.07	0.01864	2175.07	0.01576	2175.07	0.01693	2175.07	0.0211
2173.02	0.01941	2173.02	0.01793	2173.02	0.0153	2173.02	0.01652	2173.02	0.02102
2170.96	0.01966	2170.96	0.01746	2170.96	0.0144	2170.96	0.01693	2170.96	0.02094
2168.91	0.01943	2168.91	0.01807	2168.91	0.01414	2168.91	0.01767	2168.91	0.02082
2166.86	0.01912	2166.86	0.01914	2166.86	0.01465	2166.86	0.01811	2166.86	0.0205
2164.81	0.01849	2164.81	0.01928	2164.81	0.01534	2164.81	0.01796	2164.81	0.01996
2162.76	0.01674	2162.76	0.01834	2162.76	0.01599	2162.76	0.01739	2162.76	0.01917
2160.7	0.01468	2160.7	0.01725	2160.7	0.01609	2160.7	0.01654	2160.7	0.01872
2158.65	0.01397	2158.65	0.01712	2158.65	0.01512	2158.65	0.01603	2158.65	0.01881
2156.6	0.01519	2156.6	0.01828	2156.6	0.01471	2156.6	0.01685	2156.6	0.01937
2154.55	0.01749	2154.55	0.01947	2154.55	0.01548	2154.55	0.01843	2154.55	0.02032
2152.5	0.01902	2152.5	0.01931	2152.5	0.01622	2152.5	0.01889	2152.5	0.02083
2150.45	0.01906	2150.45	0.01829	2150.45	0.01637	2150.45	0.01782	2150.45	0.02051
2148.39	0.01893	2148.39	0.01827	2148.39	0.01627	2148.39	0.01719	2148.39	0.02016
2146.34	0.01986	2146.34	0.01931	2146.34	0.01676	2146.34	0.01796	2146.34	0.02049
2144.29	0.02101	2144.29	0.0197	2144.29	0.01759	2144.29	0.01899	2144.29	0.02077
2142.24	0.02125	2142.24	0.01973	2142.24	0.01777	2142.24	0.01944	2142.24	0.02036
2140.19	0.02119	2140.19	0.02044	2140.19	0.01752	2140.19	0.0195	2140.19	0.02023
2138.13	0.02133	2138.13	0.02086	2138.13	0.01749	2138.13	0.0195	2138.13	0.02104
2136.08	0.02126	2136.08	0.02053	2136.08	0.01729	2136.08	0.0191	2136.08	0.02185
2134.03	0.02122	2134.03	0.02033	2134.03	0.01691	2134.03	0.01847	2134.03	0.0221
2131.98	0.02153	2131.98	0.02065	2131.98	0.01695	2131.98	0.01866	2131.98	0.02215
2129.93	0.02201	2129.93	0.02095	2129.93	0.01746	2129.93	0.01959	2129.93	0.02216
2127.87	0.02279	2127.87	0.02115	2127.87	0.01795	2127.87	0.02024	2127.87	0.02228
2125.82	0.02341	2125.82	0.02156	2125.82	0.01803	2125.82	0.02044	2125.82	0.02268
2123.77	0.02314	2123.77	0.02208	2123.77	0.01798	2123.77	0.02022	2123.77	0.02319
2121.72	0.02254	2121.72	0.02213	2121.72	0.01802	2121.72	0.01991	2121.72	0.02347
2119.67	0.02259	2119.67	0.02165	2119.67	0.01795	2119.67	0.02008	2119.67	0.02326
2117.61	0.02292	2117.61	0.02098	2117.61	0.01768	2117.61	0.0204	2117.61	0.02265
2115.56	0.02261	2115.56	0.02035	2115.56	0.0173	2115.56	0.02018	2115.56	0.0223
2113.51	0.02204	2113.51	0.0201	2113.51	0.01715	2113.51	0.01987	2113.51	0.0225
2111.46	0.02229	2111.46	0.02055	2111.46	0.01745	2111.46	0.02003	2111.46	0.02283
2109.41	0.02286	2109.41	0.02124	2109.41	0.0177	2109.41	0.02006	2109.41	0.02301
2107.35	0.02267	2107.35	0.0215	2107.35	0.0173	2107.35	0.01988	2107.35	0.02271
2105.3	0.0222	2105.3	0.02137	2105.3	0.01686	2105.3	0.02012	2105.3	0.0222
2103.25	0.02199	2103.25	0.02091	2103.25	0.01697	2103.25	0.02015	2103.25	0.022
2101.2	0.02165	2101.2	0.02027	2101.2	0.01722	2101.2	0.01956	2101.2	0.02173
2099.15	0.02122	2099.15	0.01995	2099.15	0.01757	2099.15	0.01913	2099.15	0.02143
2097.09	0.02107	2097.09	0.01999	2097.09	0.01826	2097.09	0.01905	2097.09	0.02136
2095.04	0.02124	2095.04	0.02024	2095.04	0.01871	2095.04	0.0191	2095.04	0.02116
2092.99	0.02174	2092.99	0.02084	2092.99	0.01864	2092.99	0.01954	2092.99	0.02113
2090.94	0.0224	2090.94	0.02159	2090.94	0.01845	2090.94	0.02029	2090.94	0.02164
2088.89	0.02268	2088.89	0.02191	2088.89	0.01811	2088.89	0.02067	2088.89	0.02175
2086.83	0.02231	2086.83	0.02179	2086.83	0.01788	2086.83	0.02051	2086.83	0.02101
2084.78	0.02209	2084.78	0.02171	2084.78	0.01829	2084.78	0.02028	2084.78	0.02043
2082.73	0.02236	2082.73	0.02164	2082.73	0.01886	2082.73	0.02019	2082.73	0.0206
2080.68	0.0223	2080.68	0.02142	2080.68	0.01874	2080.68	0.02006	2080.68	0.02108
2078.63	0.02158	2078.63	0.02098	2078.63	0.01776	2078.63	0.01943	2078.63	0.02113
2076.57	0.02081	2076.57	0.02028	2076.57	0.01695	2076.57	0.01882	2076.57	0.02093
2074.52	0.02037	2074.52	0.01976	2074.52	0.01716	2074.52	0.01889	2074.52	0.02106
2072.47	0.02044	2072.47	0.01984	2072.47	0.01772	2072.47	0.0191	2072.47	0.02131
2070.42	0.02087	2070.42	0.02012	2070.42	0.01797	2070.42	0.01881	2070.42	0.02124
2068.37	0.02124	2068.37	0.02008	2068.37	0.01815	2068.37	0.01823	2068.37	0.02079
2066.32	0.02145	2066.32	0.01968	2066.32	0.01858	2066.32	0.01804	2066.32	0.02048
2064.26	0.02125	2064.26	0.0194	2064.26	0.01883	2064.26	0.01814	2064.26	0.02045
2062.21	0.02087	2062.21	0.0197	2062.21	0.01835	2062.21	0.01806	2062.21	0.02019
2060.16	0.02082	2060.16	0.02004	2060.16	0.01774	2060.16	0.01814	2060.16	0.01944
2058.11	0.02081	2058.11	0.02	2058.11	0.01762	2058.11	0.01833	2058.11	0.01866
2056.06	0.02058	2056.06	0.01975	2056.06	0.01755	2056.06	0.01849	2056.06	0.01859
2054	0.0203	2054	0.01907	2054	0.01723	2054	0.01863	2054	0.01914
2051.95	0.01975	2051.95	0.01818	2051.95	0.01656	2051.95	0.01808	2051.95	0.01928
2049.9	0.01895	2049.9	0.01777	2049.9	0.01554	2049.9	0.01706	2049.9	0.01838
2047.85	0.01841	2047.85	0.01816	2047.85	0.0149	2047.85	0.01671	2047.85	0.01723
2045.8	0.018	2045.8	0.01886	2045.8	0.0149	2045.8	0.01695	2045.8	0.01667
2043.74	0.01749	2043.74	0.01869	2043.74	0.01535	2043.74	0.01723	2043.74	0.01669
2041.69	0.01752	2041.69	0.01813	2041.69	0.01594	2041.69	0.01749	2041.69	0.01704
2039.64	0.01832	2039.64	0.01836	2039.64	0.01628	2039.64	0.01716	2039.64	0.01747
2037.59	0.01905	2037.59	0.01857	2037.59	0.01642	2037.59	0.01613	2037.59	0.01746
2035.54	0.01866	2035.54	0.0178	2035.54	0.01602	2035.54	0.01584	2035.54	0.01689
2033.48	0.01762	2033.48	0.01687	2033.48	0.01544	2033.48	0.01693	2033.48	0.01697
2031.43	0.01749	2031.43	0.01654	2031.43	0.01513	2031.43	0.01724	2031.43	0.01782
2029.38	0.01788	2029.38	0.01663	2029.38	0.01438	2029.38	0.01575	2029.38	0.01769
2027.33	0.01775	2027.33	0.01665	2027.33	0.01322	2027.33	0.01484	2027.33	0.01661
2025.28	0.01682	2025.28	0.01609	2025.28	0.01256	2025.28	0.01481	2025.28	0.0157
2023.22	0.01527	2023.22	0.01542	2023.22	0.01278	2023.22	0.01411	2023.22	0.0151
2021.17	0.01431	2021.17	0.01548	2021.17	0.01348	2021.17	0.01364	2021.17	0.01502
2019.12	0.01432	2019.12	0.01577	2019.12	0.01374	2019.12	0.01387	2019.12	0.01537
2017.07	0.01444	2017.07	0.01542	2017.07	0.0135	2017.07	0.01378	2017.07	0.01551
2015.02	0.01492	2015.02	0.01514	2015.02	0.01366	2015.02	0.01377	2015.02	0.01548
2012.96	0.01551	2012.96	0.01586	2012.96	0.01441	2012.96	0.01383	2012.96	0.01592
2010.91	0.01518	2010.91	0.01675	2010.91	0.01509	2010.91	0.01332	2010.91	0.01639
2008.86	0.01455	2008.86	0.01679	2008.86	0.01496	2008.86	0.01295	2008.86	0.01631
2006.81	0.01481	2006.81	0.01628	2006.81	0.01407	2006.81	0.01371	2006.81	0.01532
2004.76	0.01593	2004.76	0.01606	2004.76	0.0137	2004.76	0.01526	2004.76	0.01386
2002.7	0.01671	2002.7	0.01555	2002.7	0.01376	2002.7	0.01557	2002.7	0.01345
2000.65	0.01691	2000.65	0.01506	2000.65	0.01355	2000.65	0.01456	2000.65	0.0142
1998.6	0.01706	1998.6	0.01556	1998.6	0.01378	1998.6	0.01406	1998.6	0.01516
1996.55	0.01722	1996.55	0.01617	1996.55	0.01459	1996.55	0.01433	1996.55	0.0158
1994.5	0.01752	1994.5	0.01659	1994.5	0.01504	1994.5	0.01479	1994.5	0.01607
1992.44	0.01744	1992.44	0.01689	1992.44	0.01467	1992.44	0.01519	1992.44	0.01628
1990.39	0.01666	1990.39	0.01675	1990.39	0.01411	1990.39	0.01551	1990.39	0.0162
1988.34	0.01606	1988.34	0.01632	1988.34	0.01383	1988.34	0.0155	1988.34	0.01551
1986.29	0.01604	1986.29	0.01545	1986.29	0.0136	1986.29	0.0151	1986.29	0.01464
1984.24	0.01565	1984.24	0.0142	1984.24	0.01347	1984.24	0.01435	1984.24	0.01388
1982.19	0.01461	1982.19	0.01302	1982.19	0.01308	1982.19	0.01289	1982.19	0.01335
1980.13	0.01418	1980.13	0.01274	1980.13	0.01224	1980.13	0.01127	1980.13	0.01372
1978.08	0.01462	1978.08	0.01413	1978.08	0.01232	1978.08	0.01122	1978.08	0.01504
1976.03	0.01495	1976.03	0.01553	1976.03	0.01352	1976.03	0.01257	1976.03	0.01553
1973.98	0.01449	1973.98	0.01545	1973.98	0.01412	1973.98	0.01321	1973.98	0.01473
1971.93	0.01392	1971.93	0.01499	1971.93	0.01371	1971.93	0.01328	1971.93	0.01448
1969.87	0.01403	1969.87	0.01464	1969.87	0.01359	1969.87	0.01348	1969.87	0.01486
1967.82	0.01431	1967.82	0.01455	1967.82	0.01351	1967.82	0.01325	1967.82	0.01448
1965.77	0.01458	1965.77	0.01451	1965.77	0.01234	1965.77	0.01271	1965.77	0.01364
1963.72	0.01492	1963.72	0.01392	1963.72	0.01125	1963.72	0.01285	1963.72	0.01329
1961.67	0.01488	1961.67	0.0134	1961.67	0.0114	1961.67	0.01345	1961.67	0.01327
1959.61	0.01483	1959.61	0.01354	1959.61	0.01241	1959.61	0.01348	1959.61	0.01355
1957.56	0.01548	1957.56	0.01403	1957.56	0.01302	1957.56	0.01306	1957.56	0.01379
1955.51	0.01593	1955.51	0.0147	1955.51	0.01243	1955.51	0.01262	1955.51	0.01342
1953.46	0.01511	1953.46	0.01505	1953.46	0.01169	1953.46	0.01231	1953.46	0.01312
1951.41	0.01398	1951.41	0.01461	1951.41	0.01232	1951.41	0.01208	1951.41	0.01362
1949.35	0.01377	1949.35	0.01411	1949.35	0.01371	1949.35	0.01183	1949.35	0.01423
1947.3	0.01392	1947.3	0.01383	1947.3	0.01425	1947.3	0.01194	1947.3	0.01423
1945.25	0.01348	1945.25	0.01337	1945.25	0.01362	1945.25	0.01209	1945.25	0.01372
1943.2	0.01287	1943.2	0.0131	1943.2	0.01259	1943.2	0.01187	1943.2	0.01317
1941.15	0.01325	1941.15	0.01326	1941.15	0.01215	1941.15	0.01185	1941.15	0.01309
1939.09	0.01399	1939.09	0.01342	1939.09	0.01221	1939.09	0.01222	1939.09	0.01336
1937.04	0.01401	1937.04	0.01328	1937.04	0.01234	1937.04	0.01238	1937.04	0.01372
1934.99	0.01382	1934.99	0.01305	1934.99	0.01254	1934.99	0.01221	1934.99	0.01398
1932.94	0.01398	1932.94	0.01314	1932.94	0.01241	1932.94	0.01204	1932.94	0.01377
1930.89	0.01405	1930.89	0.0134	1930.89	0.01224	1930.89	0.01192	1930.89	0.01331
1928.83	0.01375	1928.83	0.01357	1928.83	0.01231	1928.83	0.01181	1928.83	0.01321
1926.78	0.01353	1926.78	0.01371	1926.78	0.012	1926.78	0.01177	1926.78	0.01352
1924.73	0.0133	1924.73	0.01376	1924.73	0.01142	1924.73	0.0118	1924.73	0.01361
1922.68	0.01291	1922.68	0.01373	1922.68	0.01115	1922.68	0.01184	1922.68	0.01304
1920.63	0.013	1920.63	0.01361	1920.63	0.01129	1920.63	0.01182	1920.63	0.01256
1918.57	0.01367	1918.57	0.01354	1918.57	0.0117	1918.57	0.01195	1918.57	0.01304
1916.52	0.01408	1916.52	0.01345	1916.52	0.01211	1916.52	0.01215	1916.52	0.01375
1914.47	0.01369	1914.47	0.01317	1914.47	0.01207	1914.47	0.01208	1914.47	0.01358
1912.42	0.01321	1912.42	0.01286	1912.42	0.01167	1912.42	0.01178	1912.42	0.01321
1910.37	0.01312	1910.37	0.0126	1910.37	0.01124	1910.37	0.01144	1910.37	0.01333
1908.31	0.01323	1908.31	0.01238	1908.31	0.01102	1908.31	0.01136	1908.31	0.01355
1906.26	0.01332	1906.26	0.01252	1906.26	0.01107	1906.26	0.01162	1906.26	0.01357
1904.21	0.01328	1904.21	0.01274	1904.21	0.01123	1904.21	0.01182	1904.21	0.01332
1902.16	0.01328	1902.16	0.01252	1902.16	0.01143	1902.16	0.01171	1902.16	0.01303
1900.11	0.01366	1900.11	0.01243	1900.11	0.01186	1900.11	0.01171	1900.11	0.0132
1898.06	0.01409	1898.06	0.01289	1898.06	0.01223	1898.06	0.01192	1898.06	0.01372
1896	0.01406	1896	0.01335	1896	0.01195	1896	0.01199	1896	0.01393
1893.95	0.0137	1893.95	0.01316	1893.95	0.01159	1893.95	0.012	1893.95	0.01364
1891.9	0.0134	1891.9	0.01261	1891.9	0.01182	1891.9	0.01202	1891.9	0.01332
1889.85	0.01335	1889.85	0.01232	1889.85	0.01201	1889.85	0.01183	1889.85	0.0131
1887.8	0.01356	1887.8	0.01254	1887.8	0.01175	1887.8	0.01161	1887.8	0.01292
1885.74	0.01386	1885.74	0.01292	1885.74	0.01147	1885.74	0.01179	1885.74	0.01311
1883.69	0.01397	1883.69	0.01305	1883.69	0.01147	1883.69	0.01209	1883.69	0.01348
1881.64	0.0137	1881.64	0.01299	1881.64	0.01158	1881.64	0.01211	1881.64	0.01349
1879.59	0.01346	1879.59	0.01285	1879.59	0.01165	1879.59	0.01192	1879.59	0.01319
1877.54	0.01364	1877.54	0.01277	1877.54	0.01179	1877.54	0.01184	1877.54	0.01305
1875.48	0.01391	1875.48	0.01291	1875.48	0.01173	1875.48	0.01192	1875.48	0.0132
1873.43	0.01393	1873.43	0.01314	1873.43	0.01138	1873.43	0.01199	1873.43	0.01344
1871.38	0.01362	1871.38	0.0131	1871.38	0.0111	1871.38	0.01208	1871.38	0.01356
1869.33	0.01321	1869.33	0.01283	1869.33	0.01114	1869.33	0.01208	1869.33	0.01351
1867.28	0.01327	1867.28	0.01284	1867.28	0.01166	1867.28	0.01211	1867.28	0.01351
1865.22	0.01363	1865.22	0.01303	1865.22	0.01229	1865.22	0.01228	1865.22	0.01354
1863.17	0.01397	1863.17	0.01308	1863.17	0.01257	1863.17	0.01232	1863.17	0.01347
1861.12	0.01415	1861.12	0.01298	1861.12	0.01249	1861.12	0.01229	1861.12	0.01341
1859.07	0.01408	1859.07	0.01295	1859.07	0.01238	1859.07	0.01231	1859.07	0.01347
1857.02	0.01386	1857.02	0.01323	1857.02	0.0124	1857.02	0.01237	1857.02	0.01362
1854.96	0.01378	1854.96	0.01371	1854.96	0.01243	1854.96	0.0125	1854.96	0.01394
1852.91	0.01398	1852.91	0.01395	1852.91	0.01237	1852.91	0.01257	1852.91	0.0142
1850.86	0.01403	1850.86	0.01368	1850.86	0.01224	1850.86	0.01249	1850.86	0.01418
1848.81	0.01378	1848.81	0.01331	1848.81	0.01213	1848.81	0.01237	1848.81	0.01425
1846.76	0.01364	1846.76	0.01335	1846.76	0.01204	1846.76	0.01216	1846.76	0.01442
1844.7	0.01386	1844.7	0.01373	1844.7	0.01206	1844.7	0.01207	1844.7	0.01446
1842.65	0.01432	1842.65	0.01406	1842.65	0.01235	1842.65	0.01251	1842.65	0.01441
1840.6	0.01469	1840.6	0.01419	1840.6	0.01257	1840.6	0.01297	1840.6	0.01442
1838.55	0.0149	1838.55	0.01422	1838.55	0.01262	1838.55	0.01323	1838.55	0.01459
1836.5	0.01484	1836.5	0.0142	1836.5	0.01261	1836.5	0.01336	1836.5	0.01476
1834.44	0.01455	1834.44	0.0141	1834.44	0.01246	1834.44	0.01316	1834.44	0.01459
1832.39	0.01445	1832.39	0.01391	1832.39	0.01226	1832.39	0.01293	1832.39	0.0144
1830.34	0.01463	1830.34	0.01384	1830.34	0.01247	1830.34	0.01313	1830.34	0.01466
1828.29	0.01491	1828.29	0.01412	1828.29	0.01299	1828.29	0.01339	1828.29	0.01515
1826.24	0.01516	1826.24	0.01439	1826.24	0.01324	1826.24	0.0134	1826.24	0.01534
1824.18	0.01533	1824.18	0.01441	1824.18	0.0133	1824.18	0.01349	1824.18	0.01525
1822.13	0.01551	1822.13	0.01451	1822.13	0.01336	1822.13	0.01366	1822.13	0.01519
1820.08	0.01562	1820.08	0.01474	1820.08	0.01333	1820.08	0.01374	1820.08	0.01531
1818.03	0.01566	1818.03	0.01498	1818.03	0.01331	1818.03	0.01388	1818.03	0.01555
1815.98	0.0158	1815.98	0.0151	1815.98	0.01347	1815.98	0.01407	1815.98	0.01583
1813.93	0.01603	1813.93	0.01517	1813.93	0.01375	1813.93	0.01417	1813.93	0.01601
1811.87	0.01629	1811.87	0.0153	1811.87	0.01408	1811.87	0.01426	1811.87	0.01619
1809.82	0.01667	1809.82	0.01545	1809.82	0.01449	1809.82	0.01447	1809.82	0.01641
1807.77	0.01695	1807.77	0.01562	1807.77	0.01477	1807.77	0.01466	1807.77	0.01643
1805.72	0.01693	1805.72	0.01592	1805.72	0.01487	1805.72	0.01487	1805.72	0.0164
1803.67	0.01696	1803.67	0.01631	1803.67	0.01499	1803.67	0.01534	1803.67	0.01656
1801.61	0.01725	1801.61	0.01665	1801.61	0.01508	1801.61	0.01579	1801.61	0.01684
1799.56	0.01756	1799.56	0.01683	1799.56	0.01502	1799.56	0.01587	1799.56	0.01715
1797.51	0.01774	1797.51	0.01687	1797.51	0.01492	1797.51	0.01578	1797.51	0.01731
1795.46	0.01783	1795.46	0.01692	1795.46	0.01499	1795.46	0.0157	1795.46	0.01733
1793.41	0.01796	1793.41	0.01697	1793.41	0.0152	1793.41	0.01569	1793.41	0.01758
1791.35	0.01817	1791.35	0.01717	1791.35	0.01543	1791.35	0.01586	1791.35	0.01811
1789.3	0.01823	1789.3	0.0174	1789.3	0.01563	1789.3	0.01617	1789.3	0.01845
1787.25	0.01826	1787.25	0.01759	1787.25	0.01592	1787.25	0.01658	1787.25	0.01861
1785.2	0.01847	1785.2	0.0178	1785.2	0.01617	1785.2	0.01692	1785.2	0.01871
1783.15	0.0188	1783.15	0.01799	1783.15	0.01616	1783.15	0.01716	1783.15	0.01871
1781.09	0.01924	1781.09	0.01818	1781.09	0.01616	1781.09	0.01746	1781.09	0.01884
1779.04	0.01967	1779.04	0.01854	1779.04	0.01647	1779.04	0.01773	1779.04	0.01921
1776.99	0.01998	1776.99	0.01904	1776.99	0.01689	1776.99	0.01795	1776.99	0.01961
1774.94	0.02023	1774.94	0.01937	1774.94	0.01716	1774.94	0.01825	1774.94	0.01998
1772.89	0.02053	1772.89	0.01947	1772.89	0.01749	1772.89	0.01849	1772.89	0.0203
1770.83	0.02093	1770.83	0.01967	1770.83	0.01788	1770.83	0.01864	1770.83	0.02069
1768.78	0.0214	1768.78	0.02021	1768.78	0.01816	1768.78	0.01897	1768.78	0.02136
1766.73	0.02199	1766.73	0.02086	1766.73	0.01844	1766.73	0.01936	1766.73	0.02203
1764.68	0.02259	1764.68	0.02133	1764.68	0.01876	1764.68	0.01977	1764.68	0.02235
1762.63	0.02313	1762.63	0.02165	1762.63	0.01916	1762.63	0.0202	1762.63	0.02247
1760.57	0.02373	1760.57	0.02212	1760.57	0.01969	1760.57	0.02072	1760.57	0.0229
1758.52	0.02438	1758.52	0.02278	1758.52	0.02019	1758.52	0.0213	1758.52	0.02363
1756.47	0.02497	1756.47	0.0234	1756.47	0.02062	1756.47	0.02185	1756.47	0.02435
1754.42	0.02538	1754.42	0.02383	1754.42	0.02112	1754.42	0.02238	1754.42	0.02486
1752.37	0.02577	1752.37	0.02418	1752.37	0.02187	1752.37	0.02288	1752.37	0.02535
1750.31	0.0265	1750.31	0.02473	1750.31	0.02266	1750.31	0.02344	1750.31	0.02626
1748.26	0.02741	1748.26	0.02554	1748.26	0.02317	1748.26	0.02425	1748.26	0.02737
1746.21	0.02821	1746.21	0.02636	1746.21	0.02358	1746.21	0.02508	1746.21	0.02823
1744.16	0.0289	1744.16	0.02701	1744.16	0.024	1744.16	0.02568	1744.16	0.02885
1742.11	0.02959	1742.11	0.02767	1742.11	0.02452	1742.11	0.02638	1742.11	0.02944
1740.05	0.03054	1740.05	0.02862	1740.05	0.02523	1740.05	0.02733	1740.05	0.03022
1738	0.03159	1738	0.02973	1738	0.02597	1738	0.02815	1738	0.03108
1735.95	0.03247	1735.95	0.03076	1735.95	0.0268	1735.95	0.02888	1735.95	0.032
1733.9	0.03384	1733.9	0.0321	1733.9	0.02832	1733.9	0.03016	1733.9	0.03357
1731.85	0.03551	1731.85	0.03341	1731.85	0.0298	1731.85	0.03153	1731.85	0.03523
1729.8	0.03677	1729.8	0.03447	1729.8	0.03076	1729.8	0.0326	1729.8	0.03652
1727.74	0.03804	1727.74	0.03573	1727.74	0.03184	1727.74	0.03379	1727.74	0.03784
1725.69	0.03942	1725.69	0.03701	1725.69	0.03305	1725.69	0.03505	1725.69	0.0391
1723.64	0.04092	1723.64	0.03824	1723.64	0.03421	1723.64	0.03631	1723.64	0.04046
1721.59	0.04245	1721.59	0.03938	1721.59	0.03517	1721.59	0.03742	1721.59	0.04195
1719.54	0.0441	1719.54	0.04066	1719.54	0.03628	1719.54	0.03871	1719.54	0.04376
1717.48	0.04642	1717.48	0.04264	1717.48	0.0382	1717.48	0.04095	1717.48	0.04613
1715.43	0.04914	1715.43	0.04505	1715.43	0.04067	1715.43	0.04354	1715.43	0.04845
1713.38	0.05139	1713.38	0.04713	1713.38	0.04267	1713.38	0.04549	1713.38	0.05042
1711.33	0.0534	1711.33	0.04912	1711.33	0.0443	1711.33	0.04737	1711.33	0.05247
1709.28	0.05543	1709.28	0.05112	1709.28	0.04605	1709.28	0.04947	1709.28	0.05472
1707.22	0.05791	1707.22	0.05339	1707.22	0.04837	1707.22	0.05182	1707.22	0.05733
1705.17	0.06095	1705.17	0.05604	1705.17	0.0511	1705.17	0.05438	1705.17	0.06017
1703.12	0.0636	1703.12	0.05838	1703.12	0.0534	1703.12	0.05677	1703.12	0.06262
1701.07	0.06647	1701.07	0.06113	1701.07	0.05604	1701.07	0.05976	1701.07	0.06566
1699.02	0.07028	1699.02	0.06462	1699.02	0.0593	1699.02	0.0635	1699.02	0.06974
1696.96	0.07375	1696.96	0.06776	1696.96	0.06214	1696.96	0.06667	1696.96	0.07322
1694.91	0.07734	1694.91	0.07138	1694.91	0.06555	1694.91	0.07016	1694.91	0.07685
1692.86	0.08061	1692.86	0.07462	1692.86	0.06866	1692.86	0.07331	1692.86	0.08013
1690.81	0.08391	1690.81	0.07749	1690.81	0.07153	1690.81	0.07627	1690.81	0.08317
1688.76	0.08772	1688.76	0.08069	1688.76	0.07497	1688.76	0.07962	1688.76	0.08656
1686.7	0.09117	1686.7	0.08364	1686.7	0.07827	1686.7	0.08282	1686.7	0.08969
1684.65	0.09571	1684.65	0.08762	1684.65	0.08251	1684.65	0.08745	1684.65	0.09381
1682.6	0.10132	1682.6	0.0928	1682.6	0.08757	1682.6	0.09313	1682.6	0.09912
1680.55	0.10527	1680.55	0.09667	1680.55	0.09113	1680.55	0.09687	1680.55	0.10321
1678.5	0.10872	1678.5	0.09992	1678.5	0.09432	1678.5	0.10009	1678.5	0.10678
1676.44	0.11271	1676.44	0.10348	1676.44	0.09806	1676.44	0.10389	1676.44	0.11075
1674.39	0.11764	1674.39	0.10785	1674.39	0.10253	1674.39	0.10848	1674.39	0.11542
1672.34	0.12203	1672.34	0.11183	1672.34	0.10664	1672.34	0.11277	1672.34	0.1195
1670.29	0.1264	1670.29	0.11589	1670.29	0.11096	1670.29	0.11733	1670.29	0.12367
1668.24	0.13174	1668.24	0.121	1668.24	0.11603	1668.24	0.1227	1668.24	0.12863
1666.18	0.13609	1666.18	0.12531	1666.18	0.12027	1666.18	0.12698	1666.18	0.13245
1664.13	0.14006	1664.13	0.12916	1664.13	0.12436	1664.13	0.13084	1664.13	0.13595
1662.08	0.14501	1662.08	0.13369	1662.08	0.12916	1662.08	0.13562	1662.08	0.14049
1660.03	0.1496	1660.03	0.13802	1660.03	0.13349	1660.03	0.14031	1660.03	0.14481
1657.98	0.15302	1657.98	0.14155	1657.98	0.13695	1657.98	0.14403	1657.98	0.14809
1655.92	0.15591	1655.92	0.14445	1655.92	0.14003	1655.92	0.14714	1655.92	0.15073
1653.87	0.16009	1653.87	0.14856	1653.87	0.14473	1653.87	0.15163	1653.87	0.15451
1651.82	0.16554	1651.82	0.15443	1651.82	0.15112	1651.82	0.1574	1651.82	0.16008
1649.77	0.16821	1649.77	0.15747	1649.77	0.15432	1649.77	0.16019	1649.77	0.16302
1647.72	0.17051	1647.72	0.16003	1647.72	0.15706	1647.72	0.16275	1647.72	0.16523
1645.67	0.17405	1645.67	0.1636	1645.67	0.16068	1645.67	0.16629	1645.67	0.16797
1643.61	0.17679	1643.61	0.16615	1643.61	0.16327	1643.61	0.16869	1643.61	0.16991
1641.56	0.17841	1641.56	0.16787	1641.56	0.16517	1641.56	0.17023	1641.56	0.17125
1639.51	0.17936	1639.51	0.16926	1639.51	0.16675	1639.51	0.17141	1639.51	0.17222
1637.46	0.17968	1637.46	0.16995	1637.46	0.16764	1637.46	0.17205	1637.46	0.1728
1635.41	0.17967	1635.41	0.16995	1635.41	0.16774	1635.41	0.17209	1635.41	0.1729
1633.35	0.17914	1633.35	0.16962	1633.35	0.16713	1633.35	0.17123	1633.35	0.17207
1631.3	0.1779	1631.3	0.16888	1631.3	0.16594	1631.3	0.1698	1631.3	0.17075
1629.25	0.17585	1629.25	0.16723	1629.25	0.16378	1629.25	0.16774	1629.25	0.16877
1627.2	0.17311	1627.2	0.16466	1627.2	0.1608	1627.2	0.1649	1627.2	0.1659
1625.15	0.16983	1625.15	0.16163	1625.15	0.15738	1625.15	0.16143	1625.15	0.16261
1623.09	0.16554	1623.09	0.15786	1623.09	0.15281	1623.09	0.15702	1623.09	0.15884
1621.04	0.16099	1621.04	0.15372	1621.04	0.14789	1621.04	0.15235	1621.04	0.1551
1618.99	0.15679	1618.99	0.14973	1618.99	0.14342	1618.99	0.14795	1618.99	0.15176
1616.94	0.15141	1616.94	0.14462	1616.94	0.13752	1616.94	0.14216	1616.94	0.1474
1614.89	0.14557	1614.89	0.13905	1614.89	0.13088	1614.89	0.13581	1614.89	0.14233
1612.83	0.1409	1612.83	0.13451	1612.83	0.12566	1612.83	0.13085	1612.83	0.1381
1610.78	0.13628	1610.78	0.13	1610.78	0.12064	1610.78	0.12601	1610.78	0.13403
1608.73	0.13131	1608.73	0.12518	1608.73	0.11521	1608.73	0.12082	1608.73	0.12991
1606.68	0.12635	1606.68	0.12044	1606.68	0.10981	1606.68	0.11585	1606.68	0.12602
1604.63	0.12171	1604.63	0.11606	1604.63	0.10488	1604.63	0.11127	1604.63	0.1225
1602.57	0.11725	1602.57	0.11191	1602.57	0.10034	1602.57	0.10677	1602.57	0.11935
1600.52	0.113	1600.52	0.10799	1600.52	0.09607	1600.52	0.10244	1600.52	0.11641
1598.47	0.10912	1598.47	0.10439	1598.47	0.09214	1598.47	0.09848	1598.47	0.11374
1596.42	0.1055	1596.42	0.10085	1596.42	0.08842	1596.42	0.09487	1596.42	0.1115
1594.37	0.10191	1594.37	0.09728	1594.37	0.08492	1594.37	0.09146	1594.37	0.10971
1592.31	0.09851	1592.31	0.09394	1592.31	0.08179	1592.31	0.08814	1592.31	0.10823
1590.26	0.09547	1590.26	0.09085	1590.26	0.07887	1590.26	0.08499	1590.26	0.10706
1588.21	0.09271	1588.21	0.08798	1588.21	0.07605	1588.21	0.08215	1588.21	0.10629
1586.16	0.09013	1586.16	0.08546	1586.16	0.07347	1586.16	0.07956	1586.16	0.10596
1584.11	0.08771	1584.11	0.08319	1584.11	0.07132	1584.11	0.07719	1584.11	0.10606
1582.05	0.08534	1582.05	0.08101	1582.05	0.06945	1582.05	0.0751	1582.05	0.10652
1580	0.08304	1580	0.07897	1580	0.06767	1580	0.07322	1580	0.10709
1577.95	0.08094	1577.95	0.07697	1577.95	0.066	1577.95	0.07133	1577.95	0.10783
1575.9	0.07876	1575.9	0.07464	1575.9	0.06403	1575.9	0.06905	1575.9	0.10938
1573.85	0.07698	1573.85	0.07283	1573.85	0.0622	1573.85	0.06719	1573.85	0.1115
1571.79	0.07565	1571.79	0.07164	1571.79	0.06086	1571.79	0.06598	1571.79	0.1137
1569.74	0.07405	1569.74	0.07017	1569.74	0.05946	1569.74	0.06463	1569.74	0.11666
1567.69	0.07241	1567.69	0.06861	1567.69	0.05802	1567.69	0.06322	1567.69	0.11975
1565.64	0.07119	1565.64	0.06744	1565.64	0.05689	1565.64	0.06212	1565.64	0.12214
1563.59	0.07017	1563.59	0.06644	1563.59	0.05597	1563.59	0.06108	1563.59	0.12429
1561.54	0.06928	1561.54	0.06549	1561.54	0.05498	1561.54	0.06005	1561.54	0.12606
1559.48	0.06789	1559.48	0.0641	1559.48	0.05338	1559.48	0.0587	1559.48	0.12846
1557.43	0.06617	1557.43	0.06243	1557.43	0.05231	1557.43	0.05736	1557.43	0.13185
1555.38	0.06532	1555.38	0.06159	1555.38	0.05207	1555.38	0.05664	1555.38	0.13336
1553.33	0.0646	1553.33	0.06079	1553.33	0.05141	1553.33	0.05595	1553.33	0.13379
1551.28	0.0639	1551.28	0.05997	1551.28	0.05057	1551.28	0.05525	1551.28	0.13367
1549.22	0.06319	1549.22	0.05915	1549.22	0.04984	1549.22	0.05452	1549.22	0.13287
1547.17	0.06244	1547.17	0.05839	1547.17	0.04929	1547.17	0.05386	1547.17	0.13134
1545.12	0.06165	1545.12	0.05773	1545.12	0.0488	1545.12	0.05322	1545.12	0.12927
1543.07	0.06095	1543.07	0.05713	1543.07	0.04813	1543.07	0.05252	1543.07	0.1268
1541.02	0.06018	1541.02	0.05645	1541.02	0.0473	1541.02	0.0518	1541.02	0.12353
1538.96	0.05911	1538.96	0.05578	1538.96	0.04671	1538.96	0.05107	1538.96	0.1192
1536.91	0.05849	1536.91	0.05535	1536.91	0.0465	1536.91	0.05067	1536.91	0.11625
1534.86	0.05797	1534.86	0.05485	1534.86	0.04612	1534.86	0.05037	1534.86	0.11358
1532.81	0.0574	1532.81	0.0543	1532.81	0.04558	1532.81	0.04986	1532.81	0.11008
1530.76	0.05715	1530.76	0.05394	1530.76	0.04538	1530.76	0.04941	1530.76	0.10705
1528.7	0.05696	1528.7	0.05363	1528.7	0.04538	1528.7	0.04914	1528.7	0.10448
1526.65	0.05646	1526.65	0.05316	1526.65	0.04512	1526.65	0.04886	1526.65	0.10145
1524.6	0.0557	1524.6	0.05255	1524.6	0.04467	1524.6	0.04851	1524.6	0.09846
1522.55	0.05495	1522.55	0.05197	1522.55	0.04416	1522.55	0.04799	1522.55	0.09567
1520.5	0.0547	1520.5	0.05164	1520.5	0.04371	1520.5	0.04742	1520.5	0.09291
1518.44	0.05472	1518.44	0.05139	1518.44	0.04347	1518.44	0.04714	1518.44	0.09072
1516.39	0.05446	1516.39	0.05112	1516.39	0.04333	1516.39	0.04702	1516.39	0.08864
1514.34	0.05415	1514.34	0.05092	1514.34	0.04311	1514.34	0.04694	1514.34	0.08667
1512.29	0.05393	1512.29	0.0506	1512.29	0.0428	1512.29	0.04684	1512.29	0.08492
1510.24	0.0536	1510.24	0.0501	1510.24	0.04242	1510.24	0.04662	1510.24	0.08317
1508.18	0.05288	1508.18	0.0495	1508.18	0.04176	1508.18	0.0461	1508.18	0.08114
1506.13	0.05208	1506.13	0.04914	1506.13	0.04123	1506.13	0.04549	1506.13	0.07888
1504.08	0.05206	1504.08	0.04939	1504.08	0.04148	1504.08	0.04545	1504.08	0.07773
1502.03	0.0521	1502.03	0.04956	1502.03	0.04155	1502.03	0.04548	1502.03	0.07688
1499.98	0.05181	1499.98	0.04942	1499.98	0.04116	1499.98	0.04521	1499.98	0.07565
1497.92	0.0514	1497.92	0.04901	1497.92	0.04074	1497.92	0.0448	1497.92	0.07417
1495.87	0.05132	1495.87	0.04862	1495.87	0.0406	1495.87	0.04456	1495.87	0.07275
1493.82	0.05147	1493.82	0.04841	1493.82	0.04067	1493.82	0.0445	1493.82	0.07178
1491.77	0.05142	1491.77	0.04824	1491.77	0.04071	1491.77	0.04438	1491.77	0.071
1489.72	0.05104	1489.72	0.0481	1489.72	0.04052	1489.72	0.04423	1489.72	0.07
1487.66	0.05075	1487.66	0.04808	1487.66	0.04023	1487.66	0.04416	1487.66	0.06894
1485.61	0.05073	1485.61	0.04798	1485.61	0.03998	1485.61	0.04408	1485.61	0.06813
1483.56	0.05069	1483.56	0.04778	1483.56	0.03979	1483.56	0.04395	1483.56	0.06749
1481.51	0.05039	1481.51	0.04757	1481.51	0.03978	1481.51	0.04374	1481.51	0.06688
1479.46	0.05	1479.46	0.04741	1479.46	0.03988	1479.46	0.0435	1479.46	0.06626
1477.41	0.0498	1477.41	0.04737	1477.41	0.03989	1477.41	0.04337	1477.41	0.06562
1475.35	0.04971	1475.35	0.04728	1475.35	0.0397	1475.35	0.04324	1475.35	0.0649
1473.3	0.04951	1473.3	0.04704	1473.3	0.03931	1473.3	0.04287	1473.3	0.06425
1471.25	0.04935	1471.25	0.04694	1471.25	0.03925	1471.25	0.04252	1471.25	0.06395
1469.2	0.04923	1469.2	0.04694	1469.2	0.03936	1469.2	0.04258	1469.2	0.06383
1467.15	0.04909	1467.15	0.04677	1467.15	0.03923	1467.15	0.04279	1467.15	0.06373
1465.09	0.049	1465.09	0.04652	1465.09	0.03901	1465.09	0.0428	1465.09	0.06361
1463.04	0.04902	1463.04	0.04647	1463.04	0.03901	1463.04	0.04255	1463.04	0.06353
1460.99	0.04906	1460.99	0.0465	1460.99	0.03914	1460.99	0.04237	1460.99	0.06343
1458.94	0.04902	1458.94	0.04627	1458.94	0.03918	1458.94	0.04227	1458.94	0.06337
1456.89	0.04878	1456.89	0.04591	1456.89	0.03908	1456.89	0.04218	1456.89	0.06359
1454.83	0.0486	1454.83	0.04591	1454.83	0.039	1454.83	0.04222	1454.83	0.06403
1452.78	0.04859	1452.78	0.04608	1452.78	0.03891	1452.78	0.04219	1452.78	0.06444
1450.73	0.04845	1450.73	0.04619	1450.73	0.03872	1450.73	0.04204	1450.73	0.06496
1448.68	0.04812	1448.68	0.04617	1448.68	0.03841	1448.68	0.04198	1448.68	0.06562
1446.63	0.04792	1446.63	0.04603	1446.63	0.03816	1446.63	0.04195	1446.63	0.06633
1444.57	0.04793	1444.57	0.0459	1444.57	0.03819	1444.57	0.04187	1444.57	0.06725
1442.52	0.04793	1442.52	0.04583	1442.52	0.03832	1442.52	0.0418	1442.52	0.06846
1440.47	0.04786	1440.47	0.04573	1440.47	0.03829	1440.47	0.04175	1440.47	0.06977
1438.42	0.04769	1438.42	0.04557	1438.42	0.03822	1438.42	0.04172	1438.42	0.07126
1436.37	0.04753	1436.37	0.04549	1436.37	0.03836	1436.37	0.04178	1436.37	0.07364
1434.31	0.04752	1434.31	0.04548	1434.31	0.03852	1434.31	0.04175	1434.31	0.07616
1432.26	0.04744	1432.26	0.04531	1432.26	0.03836	1432.26	0.04149	1432.26	0.07825
1430.21	0.04732	1430.21	0.04507	1430.21	0.03807	1430.21	0.04128	1430.21	0.08082
1428.16	0.04727	1428.16	0.04501	1428.16	0.03796	1428.16	0.04129	1428.16	0.08399
1426.11	0.04725	1426.11	0.0451	1426.11	0.03798	1426.11	0.04126	1426.11	0.08733
1424.05	0.04721	1424.05	0.04516	1424.05	0.03791	1424.05	0.04116	1424.05	0.09101
1422	0.04711	1422	0.04499	1422	0.03763	1422	0.04105	1422	0.09449
1419.95	0.04693	1419.95	0.04466	1419.95	0.03726	1419.95	0.04102	1419.95	0.09773
1417.9	0.04685	1417.9	0.04463	1417.9	0.03722	1417.9	0.04111	1417.9	0.10105
1415.85	0.04684	1415.85	0.04478	1415.85	0.03746	1415.85	0.041	1415.85	0.10279
1413.79	0.04683	1413.79	0.04478	1413.79	0.03763	1413.79	0.04078	1413.79	0.10281
1411.74	0.047	1411.74	0.04478	1411.74	0.03769	1411.74	0.04072	1411.74	0.10158
1409.69	0.04716	1409.69	0.04485	1409.69	0.03762	1409.69	0.04065	1409.69	0.09892
1407.64	0.04709	1407.64	0.04491	1407.64	0.03749	1407.64	0.04051	1407.64	0.09513
1405.59	0.04685	1405.59	0.04487	1405.59	0.03736	1405.59	0.04058	1405.59	0.09084
1403.53	0.04667	1403.53	0.04478	1403.53	0.03728	1403.53	0.04078	1403.53	0.08674
1401.48	0.04662	1401.48	0.04477	1401.48	0.03729	1401.48	0.04084	1401.48	0.08323
1399.43	0.04659	1399.43	0.04466	1399.43	0.03728	1399.43	0.04073	1399.43	0.07976
1397.38	0.04652	1397.38	0.04457	1397.38	0.03731	1397.38	0.04062	1397.38	0.07649
1395.33	0.04644	1395.33	0.04464	1395.33	0.03747	1395.33	0.04056	1395.33	0.0738
1393.28	0.0464	1393.28	0.04465	1393.28	0.03762	1393.28	0.04043	1393.28	0.0714
1391.22	0.04638	1391.22	0.04452	1391.22	0.03774	1391.22	0.04033	1391.22	0.06932
1389.17	0.04633	1389.17	0.0444	1389.17	0.03795	1389.17	0.04028	1389.17	0.06742
1387.12	0.04632	1387.12	0.04442	1387.12	0.03833	1387.12	0.04039	1387.12	0.06563
1385.07	0.04642	1385.07	0.04466	1385.07	0.03891	1385.07	0.04059	1385.07	0.06427
1383.02	0.04641	1383.02	0.04483	1383.02	0.0396	1383.02	0.04059	1383.02	0.06307
1380.96	0.04629	1380.96	0.04477	1380.96	0.04035	1380.96	0.04037	1380.96	0.06181
1378.91	0.04627	1378.91	0.04465	1378.91	0.04129	1378.91	0.04027	1378.91	0.06083
1376.86	0.04626	1376.86	0.04462	1376.86	0.04244	1376.86	0.0403	1376.86	0.06006
1374.81	0.04609	1374.81	0.04461	1374.81	0.04404	1374.81	0.04024	1374.81	0.05912
1372.76	0.04594	1372.76	0.04458	1372.76	0.04649	1372.76	0.04019	1372.76	0.05815
1370.7	0.04589	1370.7	0.04464	1370.7	0.04993	1370.7	0.04029	1370.7	0.05748
1368.65	0.0459	1368.65	0.04477	1368.65	0.05481	1368.65	0.04045	1368.65	0.05698
1366.6	0.04595	1366.6	0.04478	1366.6	0.06143	1366.6	0.04049	1366.6	0.05653
1364.55	0.04593	1364.55	0.04453	1364.55	0.07006	1364.55	0.04043	1364.55	0.05614
1362.5	0.04589	1362.5	0.04431	1362.5	0.08216	1362.5	0.0404	1362.5	0.05589
1360.44	0.04591	1360.44	0.04444	1360.44	0.09693	1360.44	0.04041	1360.44	0.05584
1358.39	0.04593	1358.39	0.04467	1358.39	0.11194	1358.39	0.04036	1358.39	0.05583
1356.34	0.04584	1356.34	0.04463	1356.34	0.12653	1356.34	0.04023	1356.34	0.05578
1354.29	0.04569	1354.29	0.04434	1354.29	0.1396	1354.29	0.0401	1354.29	0.05588
1352.24	0.04563	1352.24	0.04424	1352.24	0.14948	1352.24	0.04011	1352.24	0.05643
1350.18	0.04558	1350.18	0.04446	1350.18	0.15495	1350.18	0.04025	1350.18	0.05717
1348.13	0.04549	1348.13	0.04461	1348.13	0.15544	1348.13	0.04034	1348.13	0.0576
1346.08	0.04551	1346.08	0.04457	1346.08	0.15154	1346.08	0.04038	1346.08	0.05742
1344.03	0.04562	1344.03	0.04451	1344.03	0.14471	1344.03	0.04051	1344.03	0.05669
1341.98	0.04575	1341.98	0.0445	1341.98	0.13656	1341.98	0.04067	1341.98	0.05564
1339.92	0.04594	1339.92	0.04452	1339.92	0.128	1339.92	0.04086	1339.92	0.0547
1337.87	0.04612	1337.87	0.04459	1337.87	0.12053	1337.87	0.0411	1337.87	0.05408
1335.82	0.04605	1335.82	0.04463	1335.82	0.1155	1335.82	0.04127	1335.82	0.05352
1333.77	0.04588	1333.77	0.04461	1333.77	0.11261	1333.77	0.04131	1333.77	0.05297
1331.72	0.04582	1331.72	0.04455	1331.72	0.11105	1331.72	0.04134	1331.72	0.05256
1329.66	0.04577	1329.66	0.04452	1329.66	0.11003	1329.66	0.04154	1329.66	0.0522
1327.61	0.04569	1327.61	0.04458	1327.61	0.1088	1327.61	0.04187	1327.61	0.05178
1325.56	0.04565	1325.56	0.04469	1325.56	0.10681	1325.56	0.04218	1325.56	0.05149
1323.51	0.04567	1323.51	0.04474	1323.51	0.10373	1323.51	0.04253	1323.51	0.05136
1321.46	0.04571	1321.46	0.04474	1321.46	0.09948	1321.46	0.04303	1321.46	0.05121
1319.4	0.04566	1319.4	0.04462	1319.4	0.0942	1319.4	0.04355	1319.4	0.05103
1317.35	0.0456	1317.35	0.04448	1317.35	0.08846	1317.35	0.04418	1317.35	0.05098
1315.3	0.04564	1315.3	0.04439	1315.3	0.08287	1315.3	0.04505	1315.3	0.05097
1313.25	0.04571	1313.25	0.04438	1313.25	0.07757	1313.25	0.04603	1313.25	0.0508
1311.2	0.04574	1311.2	0.04454	1311.2	0.07273	1311.2	0.04721	1311.2	0.05056
1309.15	0.04577	1309.15	0.04469	1309.15	0.06849	1309.15	0.04871	1309.15	0.05049
1307.09	0.04573	1307.09	0.0447	1307.09	0.06487	1307.09	0.05064	1307.09	0.05049
1305.04	0.04554	1305.04	0.04461	1305.04	0.06178	1305.04	0.05311	1305.04	0.0504
1302.99	0.04539	1302.99	0.04451	1302.99	0.05902	1302.99	0.0562	1302.99	0.05022
1300.94	0.04541	1300.94	0.04446	1300.94	0.05658	1300.94	0.05999	1300.94	0.05004
1298.89	0.04549	1298.89	0.04447	1298.89	0.05447	1298.89	0.06456	1298.89	0.04993
1296.83	0.0455	1296.83	0.04456	1296.83	0.05262	1296.83	0.06988	1296.83	0.04982
1294.78	0.04551	1294.78	0.04459	1294.78	0.05091	1294.78	0.07586	1294.78	0.04968
1292.73	0.04554	1292.73	0.04448	1292.73	0.0495	1292.73	0.08248	1292.73	0.0496
1290.68	0.04553	1290.68	0.04441	1290.68	0.04852	1290.68	0.08969	1290.68	0.04964
1288.63	0.0455	1288.63	0.04438	1288.63	0.04778	1288.63	0.0972	1288.63	0.04965
1286.57	0.04547	1286.57	0.04434	1286.57	0.04725	1286.57	0.1046	1286.57	0.04959
1284.52	0.04538	1284.52	0.04434	1284.52	0.04684	1284.52	0.11172	1284.52	0.0495
1282.47	0.04526	1282.47	0.04438	1282.47	0.04643	1282.47	0.11861	1282.47	0.0494
1280.42	0.04527	1280.42	0.04433	1280.42	0.04611	1280.42	0.12514	1280.42	0.04925
1278.37	0.04524	1278.37	0.04418	1278.37	0.04589	1278.37	0.13121	1278.37	0.04898
1276.31	0.04507	1276.31	0.04411	1276.31	0.04563	1276.31	0.13699	1276.31	0.04875
1274.26	0.04499	1274.26	0.04416	1274.26	0.04547	1274.26	0.14251	1274.26	0.04877
1272.21	0.04512	1272.21	0.04424	1272.21	0.04551	1272.21	0.14758	1272.21	0.0489
1270.16	0.04513	1270.16	0.04416	1270.16	0.04569	1270.16	0.15225	1270.16	0.04877
1268.11	0.04489	1268.11	0.04393	1268.11	0.04581	1268.11	0.15665	1268.11	0.0485
1266.05	0.04472	1266.05	0.04383	1266.05	0.04594	1266.05	0.16085	1266.05	0.04839
1264	0.04478	1264	0.04396	1264	0.04625	1264	0.1649	1264	0.04837
1261.95	0.04489	1261.95	0.04412	1261.95	0.04685	1261.95	0.16877	1261.95	0.04839
1259.9	0.04494	1259.9	0.04416	1259.9	0.04762	1259.9	0.17228	1259.9	0.0485
1257.85	0.04501	1257.85	0.04412	1257.85	0.0484	1257.85	0.17514	1257.85	0.04844
1255.79	0.04501	1255.79	0.04405	1255.79	0.04945	1255.79	0.17688	1255.79	0.04828
1253.74	0.04497	1253.74	0.04406	1253.74	0.05106	1253.74	0.17691	1253.74	0.04836
1251.69	0.04508	1251.69	0.04415	1251.69	0.05322	1251.69	0.17503	1251.69	0.04853
1249.64	0.04524	1249.64	0.04426	1249.64	0.05596	1249.64	0.1712	1249.64	0.04851
1247.59	0.04523	1247.59	0.04428	1247.59	0.05963	1247.59	0.16518	1247.59	0.04837
1245.53	0.04518	1245.53	0.0443	1245.53	0.0648	1245.53	0.15727	1245.53	0.04827
1243.48	0.04526	1243.48	0.0444	1243.48	0.07154	1243.48	0.14824	1243.48	0.04832
1241.43	0.04532	1241.43	0.04438	1241.43	0.07887	1241.43	0.13875	1241.43	0.0485
1239.38	0.04514	1239.38	0.04416	1239.38	0.08595	1239.38	0.12966	1239.38	0.04861
1237.33	0.04498	1237.33	0.04404	1237.33	0.09313	1237.33	0.12195	1237.33	0.04856
1235.27	0.0451	1235.27	0.04414	1235.27	0.10116	1235.27	0.11659	1235.27	0.04836
1233.22	0.04528	1233.22	0.04426	1233.22	0.11	1233.22	0.115	1233.22	0.0482
1231.17	0.04537	1231.17	0.04428	1231.17	0.11874	1231.17	0.11825	1231.17	0.04814
1229.12	0.04539	1229.12	0.04426	1229.12	0.12605	1229.12	0.12375	1229.12	0.04812
1227.07	0.04538	1227.07	0.04435	1227.07	0.13099	1227.07	0.1247	1227.07	0.04822
1225.02	0.04537	1225.02	0.04449	1225.02	0.13426	1225.02	0.11714	1225.02	0.04838
1222.96	0.04542	1222.96	0.04444	1222.96	0.13834	1222.96	0.10491	1222.96	0.04845
1220.91	0.0455	1220.91	0.04435	1220.91	0.14645	1220.91	0.09357	1220.91	0.04839
1218.86	0.04551	1218.86	0.04442	1218.86	0.16074	1218.86	0.08514	1218.86	0.04813
1216.81	0.04541	1216.81	0.04446	1216.81	0.18127	1216.81	0.0792	1216.81	0.0478
1214.76	0.04525	1214.76	0.04437	1214.76	0.206	1214.76	0.07491	1214.76	0.04777
1212.7	0.04522	1212.7	0.04433	1212.7	0.23154	1212.7	0.0717	1212.7	0.04796
1210.65	0.0454	1210.65	0.04438	1210.65	0.25478	1210.65	0.06928	1210.65	0.0479
1208.6	0.04564	1208.6	0.04446	1208.6	0.27433	1208.6	0.06758	1208.6	0.04761
1206.55	0.04584	1206.55	0.04447	1206.55	0.28961	1206.55	0.06666	1206.55	0.04752
1204.5	0.0459	1204.5	0.04443	1204.5	0.29941	1204.5	0.06633	1204.5	0.04764
1202.44	0.04586	1202.44	0.04439	1202.44	0.30241	1202.44	0.06649	1202.44	0.04771
1200.39	0.04591	1200.39	0.04438	1200.39	0.2975	1200.39	0.06736	1200.39	0.04772
1198.34	0.0461	1198.34	0.04432	1198.34	0.28386	1198.34	0.0691	1198.34	0.04768
1196.29	0.04637	1196.29	0.04423	1196.29	0.26209	1196.29	0.07197	1196.29	0.04763
1194.24	0.04667	1194.24	0.04425	1194.24	0.23442	1194.24	0.07634	1194.24	0.04771
1192.18	0.04695	1192.18	0.04446	1192.18	0.20429	1192.18	0.08255	1192.18	0.04786
1190.13	0.04718	1190.13	0.0446	1190.13	0.17536	1190.13	0.09063	1190.13	0.04784
1188.08	0.04746	1188.08	0.04448	1188.08	0.15033	1188.08	0.10004	1188.08	0.04764
1186.03	0.04778	1186.03	0.04428	1186.03	0.13048	1186.03	0.10966	1186.03	0.04738
1183.98	0.04802	1183.98	0.04407	1183.98	0.11548	1183.98	0.11744	1183.98	0.04716
1181.92	0.04826	1181.92	0.04394	1181.92	0.10418	1181.92	0.12103	1181.92	0.04711
1179.87	0.04868	1179.87	0.04404	1179.87	0.09573	1179.87	0.11944	1179.87	0.04728
1177.82	0.0494	1177.82	0.0442	1177.82	0.08943	1177.82	0.11342	1177.82	0.04742
1175.77	0.05029	1175.77	0.04431	1175.77	0.08449	1175.77	0.10458	1175.77	0.0474
1173.72	0.05107	1173.72	0.04445	1173.72	0.08051	1173.72	0.09487	1173.72	0.04735
1171.66	0.05179	1171.66	0.04446	1171.66	0.07743	1171.66	0.08582	1171.66	0.04735
1169.61	0.05267	1169.61	0.04433	1169.61	0.07525	1169.61	0.07821	1169.61	0.04747
1167.56	0.05376	1167.56	0.04427	1167.56	0.07392	1167.56	0.07217	1167.56	0.04773
1165.51	0.05497	1165.51	0.04422	1165.51	0.07333	1165.51	0.06743	1165.51	0.04774
1163.46	0.05618	1163.46	0.04411	1163.46	0.07359	1163.46	0.06365	1163.46	0.04741
1161.4	0.05749	1161.4	0.04411	1161.4	0.07504	1161.4	0.06068	1161.4	0.04711
1159.35	0.05902	1159.35	0.04429	1159.35	0.07804	1159.35	0.05849	1159.35	0.04709
1157.3	0.06081	1157.3	0.04442	1157.3	0.08275	1157.3	0.0569	1157.3	0.04718
1155.25	0.06292	1155.25	0.04451	1155.25	0.08959	1155.25	0.05564	1155.25	0.04717
1153.2	0.06522	1153.2	0.0447	1153.2	0.09918	1153.2	0.05462	1153.2	0.04716
1151.14	0.06761	1151.14	0.04469	1151.14	0.11154	1151.14	0.05382	1151.14	0.04718
1149.09	0.07017	1149.09	0.04443	1149.09	0.12581	1149.09	0.05308	1149.09	0.0471
1147.04	0.07308	1147.04	0.0442	1147.04	0.13995	1147.04	0.05222	1147.04	0.04698
1144.99	0.07638	1144.99	0.04415	1144.99	0.1507	1144.99	0.05135	1144.99	0.04692
1142.94	0.07987	1142.94	0.04425	1142.94	0.15549	1142.94	0.05071	1142.94	0.04694
1140.89	0.08344	1140.89	0.04436	1140.89	0.15478	1140.89	0.05023	1140.89	0.04701
1138.83	0.08727	1138.83	0.04426	1138.83	0.15217	1138.83	0.04971	1138.83	0.04712
1136.78	0.09139	1136.78	0.04409	1136.78	0.15047	1136.78	0.04927	1136.78	0.04724
1134.73	0.09552	1134.73	0.04422	1134.73	0.14787	1134.73	0.04909	1134.73	0.04734
1132.68	0.09956	1132.68	0.04461	1132.68	0.14031	1132.68	0.04885	1132.68	0.04737
1130.63	0.10375	1130.63	0.04482	1130.63	0.12726	1130.63	0.04859	1130.63	0.0474
1128.57	0.10804	1128.57	0.04471	1128.57	0.11217	1128.57	0.0485	1128.57	0.04736
1126.52	0.11219	1126.52	0.04449	1126.52	0.09856	1126.52	0.04823	1126.52	0.04727
1124.47	0.11626	1124.47	0.04439	1124.47	0.08771	1124.47	0.04782	1124.47	0.04731
1122.42	0.12032	1122.42	0.04435	1122.42	0.0794	1122.42	0.04754	1122.42	0.04731
1120.37	0.12427	1120.37	0.04442	1120.37	0.07322	1120.37	0.04743	1120.37	0.04712
1118.31	0.12797	1118.31	0.04462	1118.31	0.06858	1118.31	0.04742	1118.31	0.04701
1116.26	0.13156	1116.26	0.04482	1116.26	0.06495	1116.26	0.04735	1116.26	0.04718
1114.21	0.1351	1114.21	0.04499	1114.21	0.06225	1114.21	0.0472	1114.21	0.04744
1112.16	0.13817	1112.16	0.045	1112.16	0.06036	1112.16	0.04705	1112.16	0.04753
1110.11	0.14071	1110.11	0.04481	1110.11	0.05895	1110.11	0.04697	1110.11	0.04743
1108.05	0.14296	1108.05	0.04473	1108.05	0.05788	1108.05	0.04698	1108.05	0.04724
1106	0.14503	1106	0.04482	1106	0.05707	1106	0.04697	1106	0.04717
1103.95	0.14684	1103.95	0.04494	1103.95	0.05651	1103.95	0.04688	1103.95	0.04723
1101.9	0.14816	1101.9	0.04482	1101.9	0.05604	1101.9	0.04681	1101.9	0.04721
1099.85	0.14897	1099.85	0.04456	1099.85	0.05564	1099.85	0.04676	1099.85	0.0472
1097.79	0.14949	1097.79	0.04461	1097.79	0.05559	1097.79	0.04669	1097.79	0.04749
1095.74	0.1493	1095.74	0.04495	1095.74	0.05572	1095.74	0.0466	1095.74	0.04789
1093.69	0.14828	1093.69	0.04519	1093.69	0.05563	1093.69	0.04653	1093.69	0.04812
1091.64	0.147	1091.64	0.0452	1091.64	0.05554	1091.64	0.04658	1091.64	0.04818
1089.59	0.14563	1089.59	0.04516	1089.59	0.05581	1089.59	0.04667	1089.59	0.04805
1087.53	0.14382	1087.53	0.04524	1087.53	0.05634	1087.53	0.04671	1087.53	0.04792
1085.48	0.14137	1085.48	0.04534	1085.48	0.05701	1085.48	0.0467	1085.48	0.048
1083.43	0.13835	1083.43	0.04543	1083.43	0.05798	1083.43	0.04674	1083.43	0.04811
1081.38	0.13476	1081.38	0.04558	1081.38	0.05952	1081.38	0.04691	1081.38	0.04823
1079.33	0.13069	1079.33	0.0456	1079.33	0.06186	1079.33	0.04707	1079.33	0.04848
1077.27	0.1264	1077.27	0.04571	1077.27	0.06527	1077.27	0.04719	1077.27	0.04875
1075.22	0.12193	1075.22	0.04606	1075.22	0.07023	1075.22	0.04735	1075.22	0.04889
1073.17	0.11719	1073.17	0.04627	1073.17	0.07751	1073.17	0.04755	1073.17	0.04889
1071.12	0.11244	1071.12	0.04625	1071.12	0.08807	1071.12	0.04772	1071.12	0.04887
1069.07	0.1079	1069.07	0.04624	1069.07	0.10252	1069.07	0.0478	1069.07	0.04897
1067.01	0.10346	1067.01	0.04614	1067.01	0.12102	1067.01	0.04779	1067.01	0.04924
1064.96	0.09908	1064.96	0.0459	1064.96	0.14275	1064.96	0.04778	1064.96	0.04949
1062.91	0.09492	1062.91	0.04577	1062.91	0.16509	1062.91	0.04789	1062.91	0.04961
1060.86	0.09128	1060.86	0.04589	1060.86	0.18346	1060.86	0.04807	1060.86	0.04985
1058.81	0.08823	1058.81	0.04613	1058.81	0.19306	1058.81	0.04834	1058.81	0.05038
1056.76	0.08532	1056.76	0.04649	1056.76	0.191	1056.76	0.04881	1056.76	0.05093
1054.7	0.08237	1054.7	0.04689	1054.7	0.17835	1054.7	0.04934	1054.7	0.05124
1052.65	0.07965	1052.65	0.04714	1052.65	0.1601	1052.65	0.0498	1052.65	0.05128
1050.6	0.07716	1050.6	0.04712	1050.6	0.1418	1050.6	0.05034	1050.6	0.05113
1048.55	0.07504	1048.55	0.04697	1048.55	0.12666	1048.55	0.05131	1048.55	0.05101
1046.5	0.07349	1046.5	0.04706	1046.5	0.11526	1046.5	0.05314	1046.5	0.05112
1044.44	0.07216	1044.44	0.04738	1044.44	0.10652	1044.44	0.05619	1044.44	0.05135
1042.39	0.0707	1042.39	0.04763	1042.39	0.09902	1042.39	0.06095	1042.39	0.05158
1040.34	0.06939	1040.34	0.04792	1040.34	0.09187	1040.34	0.06894	1040.34	0.05189
1038.29	0.0685	1038.29	0.04816	1038.29	0.08489	1038.29	0.08425	1038.29	0.0521
1036.24	0.06776	1036.24	0.04818	1036.24	0.0785	1036.24	0.11269	1036.24	0.05227
1034.18	0.06681	1034.18	0.04811	1034.18	0.07311	1034.18	0.15108	1034.18	0.05276
1032.13	0.06576	1032.13	0.04817	1032.13	0.06889	1032.13	0.17494	1032.13	0.05359
1030.08	0.065	1030.08	0.0484	1030.08	0.06576	1030.08	0.16186	1030.08	0.05453
1028.03	0.0646	1028.03	0.04877	1028.03	0.06351	1028.03	0.12718	1028.03	0.05558
1025.98	0.06431	1025.98	0.04912	1025.98	0.06201	1025.98	0.09733	1025.98	0.05677
1023.92	0.06395	1023.92	0.04933	1023.92	0.06083	1023.92	0.07947	1023.92	0.05795
1021.87	0.06364	1021.87	0.04946	1021.87	0.05961	1021.87	0.06993	1021.87	0.05899
1019.82	0.0634	1019.82	0.04957	1019.82	0.05861	1019.82	0.065	1019.82	0.05983
1017.77	0.06309	1017.77	0.04978	1017.77	0.05796	1017.77	0.06227	1017.77	0.06012
1015.72	0.06289	1015.72	0.05015	1015.72	0.05758	1015.72	0.06048	1015.72	0.05974
1013.66	0.06296	1013.66	0.05063	1013.66	0.05747	1013.66	0.05919	1013.66	0.05906
1011.61	0.06302	1011.61	0.0512	1011.61	0.05739	1011.61	0.05822	1011.61	0.05845
1009.56	0.06301	1009.56	0.05164	1009.56	0.05718	1009.56	0.05761	1009.56	0.05801
1007.51	0.06312	1007.51	0.0518	1007.51	0.05699	1007.51	0.05736	1007.51	0.05779
1005.46	0.06325	1005.46	0.05176	1005.46	0.05679	1005.46	0.05715	1005.46	0.05773
1003.4	0.06329	1003.4	0.05195	1003.4	0.05656	1003.4	0.05684	1003.4	0.05779
1001.35	0.0633	1001.35	0.05254	1001.35	0.05647	1001.35	0.05666	1001.35	0.05781
999.3	0.06331	999.3	0.05319	999.3	0.05654	999.3	0.05662	999.3	0.05771
997.248	0.06337	997.248	0.0537	997.248	0.05676	997.248	0.05652	997.248	0.05763
995.197	0.06354	995.197	0.05403	995.197	0.05711	995.197	0.05645	995.197	0.05768
993.145	0.06381	993.145	0.05422	993.145	0.05739	993.145	0.05668	993.145	0.0579
991.093	0.06419	991.093	0.05457	991.093	0.05759	991.093	0.05713	991.093	0.05835
989.041	0.06464	989.041	0.05508	989.041	0.05787	989.041	0.05752	989.041	0.05885
986.989	0.06516	986.989	0.05554	986.989	0.05818	986.989	0.05792	986.989	0.05925
984.937	0.06579	984.937	0.05593	984.937	0.05842	984.937	0.0585	984.937	0.05972
982.885	0.06643	982.885	0.05617	982.885	0.05859	982.885	0.0589	982.885	0.06024
980.833	0.06697	980.833	0.05638	980.833	0.05879	980.833	0.05903	980.833	0.06063
978.781	0.06739	978.781	0.05688	978.781	0.05914	978.781	0.05924	978.781	0.06098
976.729	0.06766	976.729	0.0576	976.729	0.05956	976.729	0.05952	976.729	0.06139
974.677	0.06786	974.677	0.05821	974.677	0.05975	974.677	0.05977	974.677	0.06176
972.625	0.06803	972.625	0.05864	972.625	0.05978	972.625	0.06015	972.625	0.06211
970.573	0.06827	970.573	0.05915	970.573	0.06017	970.573	0.06072	970.573	0.06265
968.521	0.06863	968.521	0.05978	968.521	0.06091	968.521	0.06124	968.521	0.06334
966.469	0.06896	966.469	0.06032	966.469	0.06151	966.469	0.06159	966.469	0.06405
964.417	0.06923	964.417	0.06082	964.417	0.06196	964.417	0.06196	964.417	0.06468
962.365	0.0696	962.365	0.06142	962.365	0.06248	962.365	0.0625	962.365	0.06516
960.313	0.07019	960.313	0.06219	960.313	0.06295	960.313	0.06317	960.313	0.06574
958.261	0.07094	958.261	0.06301	958.261	0.06332	958.261	0.06391	958.261	0.06646
956.209	0.07168	956.209	0.06389	956.209	0.06387	956.209	0.06464	956.209	0.06712
954.157	0.07226	954.157	0.06468	954.157	0.06469	954.157	0.06526	954.157	0.06796
952.106	0.07277	952.106	0.06537	952.106	0.06569	952.106	0.06581	952.106	0.06904
950.054	0.07344	950.054	0.06613	950.054	0.06666	950.054	0.06653	950.054	0.07001
948.002	0.07439	948.002	0.06693	948.002	0.06737	948.002	0.06741	948.002	0.07103
945.95	0.07549	945.95	0.06766	945.95	0.06784	945.95	0.06819	945.95	0.07211
943.898	0.07631	943.898	0.06831	943.898	0.06828	943.898	0.06877	943.898	0.0729
941.846	0.07686	941.846	0.06904	941.846	0.06893	941.846	0.06946	941.846	0.07356
939.794	0.07762	939.794	0.07003	939.794	0.0698	939.794	0.07033	939.794	0.07461
937.742	0.07853	937.742	0.07107	937.742	0.07076	937.742	0.07118	937.742	0.07607
935.69	0.07931	935.69	0.07195	935.69	0.07175	935.69	0.07218	935.69	0.07745
933.638	0.08021	933.638	0.07292	933.638	0.07266	933.638	0.07344	933.638	0.07887
931.586	0.08141	931.586	0.07404	931.586	0.07358	931.586	0.07468	931.586	0.08073
929.534	0.08271	929.534	0.07503	929.534	0.07458	929.534	0.07569	929.534	0.0826
927.482	0.08398	927.482	0.07589	927.482	0.07563	927.482	0.07669	927.482	0.0839
925.43	0.08531	925.43	0.07698	925.43	0.07681	925.43	0.07784	925.43	0.08488
923.378	0.0865	923.378	0.07849	923.378	0.078	923.378	0.07893	923.378	0.08573
921.326	0.08738	921.326	0.0799	921.326	0.07897	921.326	0.07993	921.326	0.08634
919.274	0.08834	919.274	0.08097	919.274	0.07995	919.274	0.08112	919.274	0.08718
917.222	0.08972	917.222	0.08209	917.222	0.08132	917.222	0.08249	917.222	0.08854
915.17	0.09123	915.17	0.08344	915.17	0.08276	915.17	0.08386	915.17	0.08981
913.118	0.09261	913.118	0.08491	913.118	0.08378	913.118	0.08514	913.118	0.09085
911.067	0.09395	911.067	0.08645	911.067	0.08473	911.067	0.08641	911.067	0.09209
909.015	0.0954	909.015	0.08791	909.015	0.086	909.015	0.08761	909.015	0.09354
906.963	0.09712	906.963	0.08938	906.963	0.08743	906.963	0.08876	906.963	0.09509
904.911	0.09903	904.911	0.09093	904.911	0.08896	904.911	0.09024	904.911	0.09687
902.859	0.10057	902.859	0.09238	902.859	0.09038	902.859	0.09178	902.859	0.09872
900.807	0.10183	900.807	0.09375	900.807	0.09152	900.807	0.09307	900.807	0.1003
898.755	0.10352	898.755	0.09518	898.755	0.0928	898.755	0.09457	898.755	0.10194
896.703	0.10547	896.703	0.09674	896.703	0.09448	896.703	0.09638	896.703	0.10369
894.651	0.10729	894.651	0.09858	894.651	0.0965	894.651	0.09828	894.651	0.10537
892.599	0.10879	892.599	0.10043	892.599	0.09844	892.599	0.10013	892.599	0.1073
890.547	0.11014	890.547	0.10188	890.547	0.09983	890.547	0.10161	890.547	0.10921
888.495	0.11182	888.495	0.10327	888.495	0.10097	888.495	0.10291	888.495	0.11089
886.443	0.11375	886.443	0.10485	886.443	0.10244	886.443	0.10441	886.443	0.11283
884.391	0.11549	884.391	0.10645	884.391	0.10411	884.391	0.10626	884.391	0.11493
882.339	0.11729	882.339	0.1083	882.339	0.10572	882.339	0.10835	882.339	0.11673
880.287	0.11953	880.287	0.1106	880.287	0.10745	880.287	0.11054	880.287	0.11849
878.235	0.12187	878.235	0.11291	878.235	0.10947	878.235	0.11271	878.235	0.12039
876.183	0.12391	876.183	0.11494	876.183	0.11162	876.183	0.11443	876.183	0.12227
874.131	0.12582	874.131	0.11676	874.131	0.11368	874.131	0.11591	874.131	0.12443
872.079	0.12769	872.079	0.11855	872.079	0.11564	872.079	0.11762	872.079	0.12694
870.027	0.12952	870.027	0.12055	870.027	0.11746	870.027	0.11944	870.027	0.12917
867.976	0.13146	867.976	0.12275	867.976	0.11914	867.976	0.12143	867.976	0.13115
865.924	0.13367	865.924	0.12497	865.924	0.12096	865.924	0.12374	865.924	0.13332
863.872	0.13582	863.872	0.12695	863.872	0.12298	863.872	0.12595	863.872	0.13552
861.82	0.13777	861.82	0.12877	861.82	0.12505	861.82	0.12795	861.82	0.13778
859.768	0.13996	859.768	0.13066	859.768	0.12725	859.768	0.12998	859.768	0.14053
857.716	0.14244	857.716	0.13262	857.716	0.1295	857.716	0.132	857.716	0.14343
855.664	0.14485	855.664	0.13494	855.664	0.13159	855.664	0.13431	855.664	0.14566
853.612	0.14707	853.612	0.13764	853.612	0.13358	853.612	0.13683	853.612	0.14752
851.56	0.14929	851.56	0.14009	851.56	0.13561	851.56	0.1389	851.56	0.1498
849.508	0.15161	849.508	0.1422	849.508	0.1376	849.508	0.14083	849.508	0.15231
847.456	0.15391	847.456	0.14446	847.456	0.13952	847.456	0.14318	847.456	0.1546
845.404	0.1563	845.404	0.14687	845.404	0.14162	845.404	0.14565	845.404	0.15683
843.352	0.15898	843.352	0.14926	843.352	0.14408	843.352	0.14796	843.352	0.15918
841.3	0.16152	841.3	0.15169	841.3	0.14672	841.3	0.15047	841.3	0.16189
839.248	0.16375	839.248	0.15416	839.248	0.14915	839.248	0.15319	839.248	0.16495
837.196	0.16631	837.196	0.15666	837.196	0.15137	837.196	0.15566	837.196	0.16787
835.144	0.16915	835.144	0.15893	835.144	0.15364	835.144	0.1578	835.144	0.17056
833.092	0.17167	833.092	0.16085	833.092	0.15594	833.092	0.15968	833.092	0.1728
831.04	0.17381	831.04	0.1629	831.04	0.15819	831.04	0.16146	831.04	0.1744
828.988	0.17573	828.988	0.16556	828.988	0.16046	828.988	0.16364	828.988	0.17609
826.936	0.17781	826.936	0.16835	826.936	0.16293	826.936	0.16632	826.936	0.17865
824.885	0.18039	824.885	0.17079	824.885	0.16532	824.885	0.16871	824.885	0.18148
822.833	0.18315	822.833	0.17309	822.833	0.16745	822.833	0.17063	822.833	0.18387
820.781	0.18588	820.781	0.17567	820.781	0.16953	820.781	0.17278	820.781	0.18623
818.729	0.18901	818.729	0.17846	818.729	0.17171	818.729	0.17571	818.729	0.18909
816.677	0.19233	816.677	0.18113	816.677	0.17428	816.677	0.17903	816.677	0.19247
814.625	0.1948	814.625	0.18347	814.625	0.17728	814.625	0.18175	814.625	0.1956
812.573	0.19639	812.573	0.18571	812.573	0.18009	812.573	0.18375	812.573	0.19792
810.521	0.19817	810.521	0.18848	810.521	0.18255	810.521	0.18595	810.521	0.20008
808.469	0.20064	808.469	0.19135	808.469	0.18502	808.469	0.18887	808.469	0.20259
806.417	0.20333	806.417	0.19353	806.417	0.18768	806.417	0.192	806.417	0.20525
804.365	0.20608	804.365	0.19559	804.365	0.19072	804.365	0.19462	804.365	0.20804
802.313	0.20888	802.313	0.19825	802.313	0.19462	802.313	0.19678	802.313	0.2109
800.261	0.21149	800.261	0.20143	800.261	0.19964	800.261	0.19889	800.261	0.21357
798.209	0.21416	798.209	0.20445	798.209	0.2053	798.209	0.20114	798.209	0.21618
796.157	0.21703	796.157	0.20687	796.157	0.21025	796.157	0.20366	796.157	0.21876
794.105	0.21997	794.105	0.20923	794.105	0.21342	794.105	0.20665	794.105	0.22123
792.053	0.22308	792.053	0.21157	792.053	0.21493	792.053	0.20983	792.053	0.22373
790.001	0.22601	790.001	0.21384	790.001	0.21566	790.001	0.2124	790.001	0.22639
787.949	0.22864	787.949	0.21676	787.949	0.21663	787.949	0.21442	787.949	0.22957
785.897	0.23125	785.897	0.22004	785.897	0.21811	785.897	0.2169	785.897	0.23349
783.846	0.23369	783.846	0.2228	783.846	0.22004	783.846	0.21976	783.846	0.23728
781.794	0.23599	781.794	0.22514	781.794	0.2225	781.794	0.22235	781.794	0.24023
779.742	0.23846	779.742	0.22763	779.742	0.22525	779.742	0.22478	779.742	0.24274
777.69	0.24105	777.69	0.23047	777.69	0.22778	777.69	0.22725	777.69	0.24517
775.638	0.24404	775.638	0.23348	775.638	0.22995	775.638	0.2298	775.638	0.24771
773.586	0.24764	773.586	0.23623	773.586	0.23198	773.586	0.23241	773.586	0.25031
771.534	0.25085	771.534	0.23866	771.534	0.23424	771.534	0.23525	771.534	0.25281
769.482	0.25341	769.482	0.24137	769.482	0.23786	769.482	0.23887	769.482	0.25567
767.43	0.25637	767.43	0.24454	767.43	0.24249	767.43	0.24375	767.43	0.259
765.378	0.25957	765.378	0.24758	765.378	0.24589	765.378	0.24912	765.378	0.26216
763.326	0.26188	763.326	0.25019	763.326	0.24748	763.326	0.25316	763.326	0.26495
761.274	0.26382	761.274	0.25265	761.274	0.24834	761.274	0.25503	761.274	0.26769
759.222	0.26669	759.222	0.25518	759.222	0.24942	759.222	0.25587	759.222	0.27043
757.17	0.27018	757.17	0.25788	757.17	0.2512	757.17	0.25708	757.17	0.27309
755.118	0.27311	755.118	0.26103	755.118	0.25338	755.118	0.25909	755.118	0.27577
753.066	0.27557	753.066	0.26434	753.066	0.25573	753.066	0.26174	753.066	0.27836
751.014	0.2783	751.014	0.26724	751.014	0.25827	751.014	0.26426	751.014	0.28102
748.962	0.28138	748.962	0.26976	748.962	0.26171	748.962	0.26646	748.962	0.28386
746.91	0.28439	746.91	0.27232	746.91	0.26758	746.91	0.26909	746.91	0.28692
744.858	0.28718	744.858	0.27483	744.858	0.27488	744.858	0.2722	744.858	0.29049
742.806	0.29	742.806	0.27709	742.806	0.28011	742.806	0.27505	742.806	0.29413
740.755	0.29248	740.755	0.2795	740.755	0.28229	740.755	0.2773	740.755	0.29712
738.703	0.29516	738.703	0.28213	738.703	0.28361	738.703	0.27953	738.703	0.29984
736.651	0.29898	736.651	0.28495	736.651	0.28555	736.651	0.28227	736.651	0.30266
734.599	0.30256	734.599	0.28816	734.599	0.28767	734.599	0.28539	734.599	0.30522
732.547	0.30544	732.547	0.29115	732.547	0.2895	732.547	0.28839	732.547	0.30781
730.495	0.30842	730.495	0.29361	730.495	0.29118	730.495	0.29112	730.495	0.31087
728.443	0.31119	728.443	0.29642	728.443	0.29304	728.443	0.29415	728.443	0.31398
726.391	0.3139	726.391	0.29973	726.391	0.29521	726.391	0.29749	726.391	0.31701
724.339	0.31675	724.339	0.30293	724.339	0.29735	724.339	0.30017	724.339	0.31987
722.287	0.31958	722.287	0.3058	722.287	0.29969	722.287	0.30231	722.287	0.32236
720.235	0.32222	720.235	0.30858	720.235	0.30255	720.235	0.30473	720.235	0.32508
718.183	0.32523	718.183	0.31153	718.183	0.30544	718.183	0.30735	718.183	0.32843
716.131	0.32904	716.131	0.31415	716.131	0.30806	716.131	0.30985	716.131	0.33165
714.079	0.33227	714.079	0.31618	714.079	0.31022	714.079	0.31226	714.079	0.33391
712.027	0.33451	712.027	0.3187	712.027	0.31184	712.027	0.31503	712.027	0.33602
709.975	0.3368	709.975	0.32176	709.975	0.31356	709.975	0.31766	709.975	0.33899
707.923	0.33949	707.923	0.32411	707.923	0.31657	707.923	0.31966	707.923	0.3423
705.871	0.34241	705.871	0.3264	705.871	0.32033	705.871	0.32256	705.871	0.34543
703.819	0.34543	703.819	0.32975	703.819	0.32263	703.819	0.32625	703.819	0.34859
701.767	0.3489	701.767	0.33342	701.767	0.32357	701.767	0.3289	701.767	0.35205
699.715	0.35252	699.715	0.33672	699.715	0.32527	699.715	0.33129	699.715	0.35588
697.664	0.35554	697.664	0.33952	697.664	0.32819	697.664	0.33402	697.664	0.35937
695.612	0.35804	695.612	0.34183	695.612	0.33114	695.612	0.33606	695.612	0.36166
693.56	0.3604	693.56	0.34391	693.56	0.33354	693.56	0.33771	693.56	0.3632
691.508	0.36299	691.508	0.34611	691.508	0.33548	691.508	0.33994	691.508	0.36545
689.456	0.3663	689.456	0.34897	689.456	0.33678	689.456	0.34308	689.456	0.36846
687.404	0.37034	687.404	0.35218	687.404	0.33843	687.404	0.34651	687.404	0.37135
685.352	0.37386	685.352	0.35447	685.352	0.34107	685.352	0.34933	685.352	0.37414
683.3	0.37667	683.3	0.35609	683.3	0.34374	683.3	0.35178	683.3	0.3763
681.248	0.37987	681.248	0.35884	681.248	0.34645	681.248	0.35396	681.248	0.37823
679.196	0.3826	679.196	0.36242	679.196	0.3492	679.196	0.35588	679.196	0.38166
677.144	0.38473	677.144	0.36541	677.144	0.35161	677.144	0.35841	677.144	0.38604
675.092	0.38722	675.092	0.3678	675.092	0.35387	675.092	0.3613	675.092	0.38919
673.04	0.38972	673.04	0.37038	673.04	0.35599	673.04	0.36347	673.04	0.39057
670.988	0.39162	670.988	0.37267	670.988	0.35822	670.988	0.36525	670.988	0.3917
668.936	0.39426	668.936	0.37415	668.936	0.36178	668.936	0.36851	668.936	0.39544
666.884	0.39892	666.884	0.37679	666.884	0.36585	666.884	0.37274	666.884	0.4015
664.832	0.40256	664.832	0.38046	664.832	0.36823	664.832	0.37533	664.832	0.40484
662.78	0.4051	662.78	0.38345	662.78	0.37115	662.78	0.3779	662.78	0.40762
660.728	0.40798	660.728	0.38556	660.728	0.37527	660.728	0.38117	660.728	0.41184
658.676	0.41101	658.676	0.38736	658.676	0.37881	658.676	0.38529	658.676	0.41636
656.625	0.41294	656.625	0.38926	656.625	0.38155	656.625	0.39041	656.625	0.4203
654.573	0.41501	654.573	0.3915	654.573	0.38469	654.573	0.39631	654.573	0.42369
652.521	0.41892	652.521	0.39507	652.521	0.388	652.521	0.40304	652.521	0.42712
650.469	0.42288	650.469	0.39946	650.469	0.38983	650.469	0.41038	650.469	0.43105
648.417	0.42581	648.417	0.40207	648.417	0.39085	648.417	0.41938	648.417	0.43515
646.365	0.4291	646.365	0.40357	646.365	0.39246	646.365	0.43024	646.365	0.43848
644.313	0.43297	644.313	0.40682	644.313	0.39402	644.313	0.44045	644.313	0.4411
642.261	0.4363	642.261	0.41105	642.261	0.39545	642.261	0.44782	642.261	0.44337
640.209	0.43846	640.209	0.41427	640.209	0.39761	640.209	0.45289	640.209	0.44439
638.157	0.44011	638.157	0.41648	638.157	0.40051	638.157	0.45673	638.157	0.44454
636.105	0.44282	636.105	0.41907	636.105	0.40372	636.105	0.45945	636.105	0.4459
634.053	0.44689	634.053	0.42217	634.053	0.40719	634.053	0.46192	634.053	0.449
632.001	0.45161	632.001	0.42439	632.001	0.41129	632.001	0.46401	632.001	0.45299
629.949	0.45582	629.949	0.42622	629.949	0.41628	629.949	0.46418	629.949	0.45689
627.897	0.45925	627.897	0.42866	627.897	0.42265	627.897	0.46322	627.897	0.45994
625.845	0.46305	625.845	0.43074	625.845	0.43033	625.845	0.46201	625.845	0.46158
623.793	0.46769	623.793	0.43189	623.793	0.43851	623.793	0.46082	623.793	0.46231
621.741	0.4724	621.741	0.43317	621.741	0.44717	621.741	0.4611	621.741	0.46401
619.689	0.47578	619.689	0.43496	619.689	0.45636	619.689	0.4625	619.689	0.46684
617.637	0.47831	617.637	0.43637	617.637	0.46584	617.637	0.46362	617.637	0.46915
615.585	0.48137	615.585	0.43763	615.585	0.47523	615.585	0.46454	615.585	0.47023
613.534	0.48442	613.534	0.4408	613.534	0.4832	613.534	0.46532	613.534	0.47148
611.482	0.48763	611.482	0.44519	611.482	0.48926	611.482	0.46555	611.482	0.47391
609.43	0.49174	609.43	0.44717	609.43	0.49376	609.43	0.46665	609.43	0.47604
607.378	0.49548	607.378	0.44736	607.378	0.49655	607.378	0.46982	607.378	0.47769
605.326	0.49739	605.326	0.44957	605.326	0.49831	605.326	0.47333	605.326	0.48063
603.274	0.4982	603.274	0.45341	603.274	0.49994	603.274	0.47537	603.274	0.48471
601.222	0.49924	601.222	0.45638	601.222	0.50226	601.222	0.47701	601.222	0.48799
599.17	0.50043	599.17	0.45861	599.17	0.50453	599.17	0.47878	599.17	0.48947
597.118	0.50234	597.118	0.46143	597.118	0.50401	597.118	0.47944	597.118	0.49025
595.066	0.50553	595.066	0.46399	595.066	0.50107	595.066	0.48005	595.066	0.4918
593.014	0.50812	593.014	0.46513	593.014	0.49934	593.014	0.48114	593.014	0.49437
590.962	0.50818	590.962	0.46594	590.962	0.49887	590.962	0.48241	590.962	0.49602
588.91	0.50671	588.91	0.46715	588.91	0.49779	588.91	0.48445	588.91	0.4957
586.858	0.50665	586.858	0.46873	586.858	0.49725	586.858	0.48674	586.858	0.49558
584.806	0.50923	584.806	0.47133	584.806	0.49728	584.806	0.48864	584.806	0.49718
582.754	0.51329	582.754	0.47451	582.754	0.49704	582.754	0.49038	582.754	0.5009
580.702	0.51596	580.702	0.47689	580.702	0.49754	580.702	0.49237	580.702	0.50518
578.65	0.5161	578.65	0.47855	578.65	0.50158	578.65	0.49537	578.65	0.50725
576.598	0.51623	576.598	0.48009	576.598	0.51186	576.598	0.50077	576.598	0.50727
574.546	0.51708	574.546	0.48164	574.546	0.52602	574.546	0.50666	574.546	0.50756
572.494	0.51716	572.494	0.48403	572.494	0.53798	572.494	0.50952	572.494	0.51011
570.443	0.51815	570.443	0.48678	570.443	0.54447	570.443	0.50949	570.443	0.5139
568.391	0.52345	568.391	0.48817	568.391	0.54614	568.391	0.50829	568.391	0.51576
566.339	0.53048	566.339	0.48845	566.339	0.54447	566.339	0.50907	566.339	0.51503
564.287	0.5324	564.287	0.48937	564.287	0.54054	564.287	0.51212	564.287	0.5146
562.235	0.53081	562.235	0.49164	562.235	0.53751	562.235	0.5143	562.235	0.51762
560.183	0.53258	560.183	0.49489	560.183	0.53638	560.183	0.51539	560.183	0.52308
558.131	0.53728	558.131	0.49875	558.131	0.53496	558.131	0.5167	558.131	0.5265
556.079	0.5408	556.079	0.5025	556.079	0.53358	556.079	0.51737	556.079	0.52765
554.027	0.5415	554.027	0.50537	554.027	0.53143	554.027	0.51749	554.027	0.52882
551.975	0.54086	551.975	0.50687	551.975	0.52758	551.975	0.51849	551.975	0.5299
549.923	0.54173	549.923	0.50659	549.923	0.52513	549.923	0.51887	549.923	0.53003
547.871	0.54482	547.871	0.50592	547.871	0.52473	547.871	0.51827	547.871	0.52896
545.819	0.54848	545.819	0.50712	545.819	0.52478	545.819	0.51833	545.819	0.53015
543.767	0.55046	543.767	0.50888	543.767	0.52492	543.767	0.5192	543.767	0.53568
541.715	0.55037	541.715	0.50934	541.715	0.52378	541.715	0.52097	541.715	0.54049
539.663	0.55109	539.663	0.51138	539.663	0.52204	539.663	0.52309	539.663	0.5414
537.611	0.55491	537.611	0.51544	537.611	0.52268	537.611	0.52484	537.611	0.54154
535.559	0.55753	535.559	0.51732	535.559	0.52521	535.559	0.52609	535.559	0.5437
533.507	0.55618	533.507	0.51767	533.507	0.52635	533.507	0.52655	533.507	0.54679
531.455	0.55668	531.455	0.51892	531.455	0.5253	531.455	0.52735	531.455	0.54942
529.404	0.56208	529.404	0.51978	529.404	0.5247	529.404	0.53009	529.404	0.55077
527.352	0.56755	527.352	0.52028	527.352	0.52654	527.352	0.53424	527.352	0.55088
525.3	0.56855	525.3	0.52186	525.3	0.53033	525.3	0.53919	525.3	0.55115
523.248	0.56724	523.248	0.52276	523.248	0.53274	523.248	0.54395	523.248	0.5512
521.196	0.56778	521.196	0.5235	521.196	0.53298	521.196	0.54896	521.196	0.55112
519.144	0.57019	519.144	0.5272	519.144	0.53696	519.144	0.55638	519.144	0.55328
517.092	0.57124	517.092	0.53094	517.092	0.54902	517.092	0.56245	517.092	0.55749
515.04	0.56943	515.04	0.532	515.04	0.56395	515.04	0.56288	515.04	0.56119
512.988	0.56774	512.988	0.53228	512.988	0.57504	512.988	0.5619	512.988	0.56397
510.936	0.5683	510.936	0.53225	510.936	0.5816	510.936	0.56328	510.936	0.56493
508.884	0.57033	508.884	0.53314	508.884	0.58478	508.884	0.56447	508.884	0.5625
506.832	0.57226	506.832	0.5359	506.832	0.58609	506.832	0.56304	506.832	0.55945
504.78	0.57415	504.78	0.53881	504.78	0.586	504.78	0.56087	504.78	0.55981
502.728	0.5781	502.728	0.54114	502.728	0.58491	502.728	0.55891	502.728	0.56285
500.676	0.58198	500.676	0.54285	500.676	0.58521	500.676	0.55941	500.676	0.56576
498.624	0.58297	498.624	0.5419	498.624	0.58605	498.624	0.56396	498.624	0.5674
496.572	0.58391	496.572	0.53995	496.572	0.58611	496.572	0.56936	496.572	0.56752
494.52	0.58584	494.52	0.54177	494.52	0.58597	494.52	0.57346	494.52	0.56688
492.468	0.58731	492.468	0.54669	492.468	0.58607	492.468	0.57551	492.468	0.56584
490.416	0.58981	490.416	0.55223	490.416	0.58775	490.416	0.57522	490.416	0.56636
488.364	0.59433	488.364	0.5569	488.364	0.58845	488.364	0.5754	488.364	0.57184
486.313	0.59701	486.313	0.55791	486.313	0.58433	486.313	0.57721	486.313	0.57879
484.261	0.59578	484.261	0.55604	484.261	0.58062	484.261	0.57755	484.261	0.58092
482.209	0.59618	482.209	0.55376	482.209	0.58306	482.209	0.57602	482.209	0.57911
480.157	0.59895	480.157	0.55247	480.157	0.58829	480.157	0.5759	480.157	0.57889
478.105	0.60019	478.105	0.55295	478.105	0.59167	478.105	0.57844	478.105	0.58216
476.053	0.60305	476.053	0.5547	476.053	0.59145	476.053	0.58032	476.053	0.58506
474.001	0.60908	474.001	0.55762	474.001	0.58997	474.001	0.57945	474.001	0.58377
471.949	0.61272	471.949	0.56016	471.949	0.58979	471.949	0.5798	471.949	0.58277
469.897	0.6114	469.897	0.56154	469.897	0.58953	469.897	0.58349	469.897	0.58553
467.845	0.60756	467.845	0.56419	467.845	0.59037	467.845	0.58746	467.845	0.5886
465.793	0.605	465.793	0.5662	465.793	0.59286	465.793	0.58759	465.793	0.59179
463.741	0.60586	463.741	0.56504	463.741	0.59298	463.741	0.58259	463.741	0.5939
461.689	0.60685	461.689	0.56392	461.689	0.59057	461.689	0.57703	461.689	0.5928
459.637	0.60637	459.637	0.56419	459.637	0.58944	459.637	0.57577	459.637	0.58848
457.585	0.60821	457.585	0.56394	457.585	0.58938	457.585	0.58027	457.585	0.584
455.533	0.61157	455.533	0.56593	455.533	0.58902	455.533	0.58924	455.533	0.58544
453.481	0.61233	453.481	0.57043	453.481	0.58986	453.481	0.59754	453.481	0.5891
451.429	0.61134	451.429	0.57145	451.429	0.58981	451.429	0.6005	451.429	0.59078
449.377	0.61208	449.377	0.56819	449.377	0.5868	449.377	0.59899	449.377	0.59444
447.325	0.61724	447.325	0.56723	447.325	0.58493	447.325	0.59557	447.325	0.60092
445.273	0.62385	445.273	0.57268	445.273	0.58789	445.273	0.59252	445.273	0.60632
443.222	0.62961	443.222	0.57881	443.222	0.59311	443.222	0.59466	443.222	0.60661
441.17	0.63702	441.17	0.57769	441.17	0.59414	441.17	0.59889	441.17	0.60208
439.118	0.64091	439.118	0.57115	439.118	0.59062	439.118	0.59879	439.118	0.59761
437.066	0.63252	437.066	0.56439	437.066	0.59078	437.066	0.60011	437.066	0.59532
435.014	0.61808	435.014	0.56003	435.014	0.59876	435.014	0.60464	435.014	0.6003
432.962	0.61204	432.962	0.56006	432.962	0.60476	432.962	0.60651	432.962	0.61
430.91	0.61369	430.91	0.56729	430.91	0.59827	430.91	0.61137	430.91	0.61121
428.858	0.62041	428.858	0.57545	428.858	0.58568	428.858	0.62246	428.858	0.60678
426.806	0.63213	426.806	0.5756	426.806	0.57931	426.806	0.62797	426.806	0.60429
424.754	0.63962	424.754	0.57418	424.754	0.5853	424.754	0.61853	424.754	0.60247
422.702	0.63866	422.702	0.57856	422.702	0.59748	422.702	0.6038	422.702	0.60156
420.65	0.63862	420.65	0.58226	420.65	0.59979	420.65	0.59689	420.65	0.6036
418.598	0.64201	418.598	0.57566	418.598	0.59023	418.598	0.59574	418.598	0.60629
416.546	0.637	416.546	0.5672	416.546	0.59173	416.546	0.59572	416.546	0.60419
414.494	0.62738	414.494	0.56488	414.494	0.60575	414.494	0.59676	414.494	0.60324
412.442	0.6219	412.442	0.57054	412.442	0.61888	412.442	0.59906	412.442	0.60932
410.39	0.62151	410.39	0.57797	410.39	0.62354	410.39	0.60119	410.39	0.61437
408.338	0.62704	408.338	0.57451	408.338	0.62004	408.338	0.60012	408.338	0.61012
406.286	0.63177	406.286	0.56774	406.286	0.61489	406.286	0.60148	406.286	0.60825
404.234	0.62574	404.234	0.5636	404.234	0.61212	404.234	0.6102	404.234	0.61661
402.183	0.61679	402.183	0.56085	402.183	0.61092	402.183	0.61551	402.183	0.62537
400.131	0.61507	400.131	0.56497	400.131	0.60793	400.131	0.61142	400.131	0.62907
398.079	0.62409	398.079	0.5736	398.079	0.60626	398.079	0.59943	398.079	0.62917
396.027	0.63218	396.027	0.58269	396.027	0.61936	396.027	0.58598	396.027	0.61914
393.975	0.63127	393.975	0.5974	393.975	0.63236	393.975	0.59141	393.975	0.60462
391.923	0.63439	391.923	0.60654	391.923	0.63336	391.923	0.61596	391.923	0.59596
389.871	0.64305	389.871	0.60276	389.871	0.63227	389.871	0.64306	389.871	0.5985
387.819	0.64767	387.819	0.60008	387.819	0.63093	387.819	0.65861	387.819	0.61483
385.767	0.64382	385.767	0.60032	385.767	0.62034	385.767	0.65794	385.767	0.64358
383.715	0.64278	383.715	0.59496	383.715	0.60559	383.715	0.64191	383.715	0.66791
381.663	0.64214	381.663	0.58544	381.663	0.60759	381.663	0.62965	381.663	0.65818
379.611	0.63391	379.611	0.57113	379.611	0.61667	379.611	0.63191	379.611	0.63532

## Sheet: Fig. 2e
Time	Magnetization	Magnetization	Magnetization	Magnetization
s	I/I\-(0)	I/I\-(0)	I/I\-(0)	I/I\-(0)
	1.0 m LiOTf	0.5 m Li\-(2)SO\-(4)	1.0 m LiTFSI	1.0 m LiOAc
0.0125	-0.84087	-0.92071	-0.93794	-0.78294
0.025	-0.7339	-0.73811	-0.81925	-0.67067
0.05	-0.41601	-0.25656	-0.45384	-0.30353
0.1	0.35826	0.46938	0.39151	0.4969
0.4	0.73406	0.50773	0.79372	0.733
0.8	0.7769	0.52832	0.82807	0.7679
1.6	0.84131	0.63367	0.88235	0.83237
3.2	0.92774	0.81874	0.93734	0.92144
6.4	1	1	1	1

## Sheet: Fig. 3a
r	n(r)	n(r)		r	e(r)	e(r)
A				A
	TFSI	SO4			TFSI	SO4
0.12	0	0		0.07	0	0
0.32	0	0		0.32	0	0
0.52	0	0		0.57	0	0
0.72	0	0		0.82	0	0
0.92	0	0		1.07	0	0
1.12	0	0		1.32	0	0
1.32	0	0		1.57	-1.69e-07	0
1.52	0	0		1.82	-2.59e-05	-3.61e-07
1.72	0	0		2.07	-0.000139	-0.000352
1.92	0	0		2.32	-0.000172	-0.00255
2.12	0	0		2.57	-0.000124	-0.00262
2.32	0	0		2.82	-8.42e-06	-0.00156
2.52	4.14e-06	0		3.07	0.000116	-0.000935
2.72	5.6e-06	0		3.32	0.000136	0.000457
2.92	1.79e-05	0		3.57	5.74e-05	0.00159
3.12	2.49e-05	3.73e-05		3.82	-0.000179	0.00123
3.32	6.98e-06	0.00016		4.07	-0.00066	-0.00142
3.52	1.65e-05	0.00251		4.32	-0.00132	-0.00404
3.72	6.37e-06	0.00134		4.57	-0.00177	-0.00389
3.92	2.49e-05	0.00292		4.82	-0.00182	-0.00235
4.12	8.42e-05	0.00308		5.07	-0.00117	-0.00108
4.32	4.98e-05	0.00044		5.32	0.000285	-0.000415
4.52	0.000255	0.000585		5.57	0.00146	-0.000223
4.72	0.000107	9.35e-05		5.82	0.00144	-0.000243
4.92	0.000271	0.000145		6.07	0.000549	-0.000336
5.12	0.000648	0.000301		6.32	-0.000383	-0.00047
5.32	0.000241	0.000176		6.57	-0.00081	-0.000578
5.52	0.000746	0.000698		6.82	-0.000766	-0.000597
5.72	0.00026	0.000233		7.07	-0.000719	-0.000538
5.92	0.00057	0.000414		7.32	-0.000927	-0.000475
6.12	0.000709	0.000352		7.57	-0.00112	-0.000465
6.32	0.00158	0.00044		7.82	-0.00104	-0.000486
6.52	0.00142	0.000265		8.07	-0.000788	-0.000489
6.72	0.000744	0.000129		8.32	-0.000529	-0.000466
6.92	0.00142	0.000252		8.57	-0.000424	-0.000431
7.12	0.00129	0.000248		8.82	-0.00046	-0.000393
7.32	0.00173	0.000354		9.07	-0.000505	-0.000398
7.52	0.00103	0.000232		9.32	-0.000548	-0.000396
7.72	0.000481	0.000107		9.57	-0.000558	-0.000424
7.92	0.000871	0.00022		9.82	-0.000541	-0.000455
8.12	0.00076	0.000225		10.1	-0.000577	-0.000472
8.32	0.000935	0.000352		10.3	-0.00055	-0.00048
8.52	0.000505	0.000265		10.6	-0.000548	-0.000477
8.72	0.000235	0.00013		10.8	-0.000521	-0.000458
8.92	0.000449	0.000283		11.1	-0.000467	-0.000454
9.12	0.000447	0.000296		11.3	-0.000452	-0.000456
9.32	0.000669	0.000441		11.6	-0.000406	-0.000438
9.52	0.000468	0.00029		11.8	-0.000411	-0.000437
9.72	0.000248	0.000138		12.1	-0.000425	-0.000435
9.92	0.000511	0.00026		12.3	-0.000443	-0.000439
10.1	0.000534	0.00025		12.6	-0.000454	-0.000471
10.3	0.00083	0.000366		12.8	-0.000463	-0.000475
10.5	0.000572	0.00024
10.7	0.000277	0.000115
10.9	0.000561	0.000225
11.1	0.000558	0.000236
11.3	0.000805	0.000356
11.5	0.000532	0.000255
11.7	0.000265	0.000122
11.9	0.00053	0.000253
12.1	0.000545	0.000263
12.3	0.00082	0.0004
12.5	0.000543	0.000277
12.7	0.000275	0.000144
12.9	0.000546	0.000276
13.1	0.000543	0.000279
13.3	0.000818	0.000421

## Sheet: Fig. 3b
Anion	DE
	kJ mol\+(−1)
LiTFSI	-0.25
Li\-(2)SO\-(4)	-0.803

## Sheet: Fig. 3c
Time	ACF	Time	ACF
ps		ps
TFSI-F			SO42-
0	1	0	1
1	0.57581	1	0.83218
2	0.50306	2	0.78011
3	0.44998	3	0.73784
4	0.40809	4	0.70113
5	0.37342	5	0.66852
6	0.34398	6	0.63896
7	0.31851	7	0.61205
8	0.29634	8	0.58731
9	0.27666	9	0.5645
10	0.2592	10	0.54344
11	0.2436	11	0.52373
12	0.22956	12	0.50543
13	0.21684	13	0.48832
14	0.20529	14	0.47234
15	0.19479	15	0.45735
16	0.18515	16	0.4432
17	0.1763	17	0.42992
18	0.16813	18	0.41743
19	0.16064	19	0.40558
20	0.15371	20	0.39437
21	0.14727	21	0.38381
22	0.14126	22	0.37375
23	0.13568	23	0.36423
24	0.13051	24	0.35517
25	0.12562	25	0.34654
26	0.12111	26	0.33834
27	0.1168	27	0.33052
28	0.11282	28	0.32306
29	0.10902	29	0.31589
30	0.10547	30	0.30904
31	0.10214	31	0.30248
32	0.09895	32	0.29621
33	0.09599	33	0.29024
34	0.09317	34	0.28445
35	0.0905	35	0.27891
36	0.08792	36	0.27362
37	0.08548	37	0.2685
38	0.08323	38	0.26357
39	0.08099	39	0.25882
40	0.07891	40	0.25422
41	0.0769	41	0.24985
42	0.07499	42	0.24559
43	0.07319	43	0.24147
44	0.07144	44	0.23749
45	0.06974	45	0.23364
46	0.06815	46	0.22994
47	0.06662	47	0.22635
48	0.06516	48	0.22285
49	0.06377	49	0.21948
50	0.06241	50	0.21624
51	0.06106	51	0.21307
52	0.05981	52	0.21
53	0.0586	53	0.20701
54	0.05743	54	0.20414
55	0.05629	55	0.20133
56	0.0552	56	0.19859
57	0.05418	57	0.19593
58	0.05316	58	0.19337
59	0.05217	59	0.19084
60	0.05124	60	0.18839
61	0.05032	61	0.18602
62	0.04943	62	0.18371
63	0.04857	63	0.18145
64	0.04776	64	0.17922
65	0.04696	65	0.17709
66	0.04621	66	0.175
67	0.04545	67	0.17296
68	0.04471	68	0.17097
69	0.04402	69	0.16901
70	0.04332	70	0.16713
71	0.04265	71	0.16531
72	0.042	72	0.16351
73	0.04136	73	0.16179
74	0.04074	74	0.16007
75	0.04012	75	0.15841
76	0.03954	76	0.15675
77	0.03897	77	0.15515
78	0.03843	78	0.15358
79	0.03788	79	0.15205
80	0.03737	80	0.15052
81	0.03686	81	0.14908
82	0.03638	82	0.14764
83	0.03593	83	0.14624
84	0.03544	84	0.14482
85	0.03497	85	0.14346
86	0.03452	86	0.1421
87	0.03409	87	0.14081
88	0.03365	88	0.13949
89	0.03322	89	0.13824
90	0.03282	90	0.13699
91	0.03243	91	0.13574
92	0.03204	92	0.13453
93	0.03165	93	0.13334
94	0.03126	94	0.13221
95	0.03087	95	0.13105
96	0.03051	96	0.12995
97	0.03017	97	0.12885
98	0.02982	98	0.12778
99	0.02947	99	0.12672
100	0.02916	100	0.12569
101	0.02885	101	0.12467
102	0.02853	102	0.1237
103	0.02821	103	0.12272
104	0.02792	104	0.12181
105	0.02761	105	0.12089
106	0.02733	106	0.11997
107	0.02705	107	0.11907
108	0.02676	108	0.11818
109	0.02651	109	0.11727
110	0.02624	110	0.11643
111	0.02597	111	0.11558
112	0.02573	112	0.11474
113	0.02546	113	0.11391
114	0.02522	114	0.11308
115	0.02498	115	0.11227
116	0.02474	116	0.11146
117	0.02449	117	0.11071
118	0.02427	118	0.10993
119	0.02402	119	0.10917
120	0.02378	120	0.10839
121	0.02356	121	0.10764
122	0.02334	122	0.1069
123	0.02312	123	0.10619
124	0.02291	124	0.10549
125	0.02269	125	0.10477
126	0.02249	126	0.10407
127	0.02228	127	0.1034
128	0.02209	128	0.1027
129	0.02188	129	0.10203
130	0.02168	130	0.10139
131	0.0215	131	0.10069
132	0.02132	132	0.10004
133	0.02114	133	0.09941
134	0.02096	134	0.09878
135	0.02077	135	0.09817
136	0.02061	136	0.09756
137	0.02043	137	0.09697
138	0.02025	138	0.0964
139	0.0201	139	0.0958
140	0.01995	140	0.09523
141	0.01977	141	0.09467
142	0.01962	142	0.0941
143	0.01948	143	0.09356
144	0.01932	144	0.09302
145	0.01916	145	0.09246
146	0.01903	146	0.09191
147	0.01889	147	0.09138
148	0.01874	148	0.09085
149	0.01861	149	0.09032
150	0.01849	150	0.08979
151	0.01835	151	0.08926
152	0.0182	152	0.08874
153	0.01808	153	0.08822
154	0.01795	154	0.08772
155	0.01782	155	0.08723
156	0.01767	156	0.08678
157	0.01754	157	0.08629
158	0.01743	158	0.08583
159	0.0173	159	0.08537
160	0.0172	160	0.08492
161	0.01707	161	0.08448
162	0.01695	162	0.08405
163	0.01684	163	0.08359
164	0.0167	164	0.08315
165	0.01659	165	0.08269
166	0.01648	166	0.08225
167	0.01636	167	0.08182
168	0.01624	168	0.08136
169	0.01613	169	0.08094
170	0.01602	170	0.08052
171	0.01591	171	0.08011
172	0.01581	172	0.07971
173	0.01569	173	0.0793
174	0.0156	174	0.07892
175	0.01551	175	0.07852
176	0.01539	176	0.07813
177	0.0153	177	0.07773
178	0.01519	178	0.07734
179	0.0151	179	0.07697
180	0.015	180	0.0766
181	0.01491	181	0.07623
182	0.01482	182	0.07586
183	0.01472	183	0.0755
184	0.01462	184	0.07516
185	0.01453	185	0.07478
186	0.01445	186	0.07442
187	0.01436	187	0.07403
188	0.01427	188	0.07369
189	0.01419	189	0.07336
190	0.01411	190	0.07303
191	0.01401	191	0.07268
192	0.01392	192	0.07231
193	0.01384	193	0.07197
194	0.01376	194	0.07164
195	0.01369	195	0.07131
196	0.0136	196	0.07098
197	0.01351	197	0.07067
198	0.01345	198	0.07035
199	0.01337	199	0.07005
200	0.0133	200	0.06975
201	0.01322	201	0.06944
202	0.01314	202	0.06914
203	0.01306	203	0.06885
204	0.01299	204	0.06854
205	0.01291	205	0.06824
206	0.01285	206	0.06794
207	0.01278	207	0.06765
208	0.01271	208	0.06734
209	0.01263	209	0.06704
210	0.01256	210	0.06675
211	0.01249	211	0.06645
212	0.01241	212	0.0662
213	0.01235	213	0.06593
214	0.01228	214	0.06565
215	0.01221	215	0.0654
216	0.01215	216	0.06514
217	0.01207	217	0.06485
218	0.01201	218	0.0646
219	0.01194	219	0.06437
220	0.01188	220	0.06413
221	0.01182	221	0.06386
222	0.01176	222	0.0636
223	0.01169	223	0.06337
224	0.01163	224	0.06309
225	0.01156	225	0.06285
226	0.0115	226	0.06262
227	0.01145	227	0.06237
228	0.01138	228	0.06215
229	0.01132	229	0.0619
230	0.01125	230	0.06166
231	0.01119	231	0.06144
232	0.01113	232	0.06121
233	0.01108	233	0.06099
234	0.01101	234	0.06076
235	0.01097	235	0.06054
236	0.01091	236	0.06031
237	0.01085	237	0.06008
238	0.0108	238	0.05985
239	0.01075	239	0.05962
240	0.0107	240	0.05939
241	0.01065	241	0.05915
242	0.01059	242	0.05892
243	0.01053	243	0.05869
244	0.01048	244	0.05848
245	0.01041	245	0.05825
246	0.01036	246	0.05803
247	0.01032	247	0.05783
248	0.01028	248	0.05761
249	0.01022	249	0.05739
250	0.01017	250	0.05719
251	0.01011	251	0.05697
252	0.01008	252	0.05678
253	0.01004	253	0.05656
254	0.00997	254	0.05636
255	0.00993	255	0.05615
256	0.00989	256	0.05594
257	0.00985	257	0.05576
258	0.00981	258	0.05557
259	0.00977	259	0.05538
260	0.00973	260	0.05519
261	0.0097	261	0.05502
262	0.00965	262	0.05483
263	0.0096	263	0.05462
264	0.00955	264	0.05444
265	0.00951	265	0.05427
266	0.00947	266	0.05411
267	0.00943	267	0.05393
268	0.00939	268	0.05376
269	0.00936	269	0.05356
270	0.00932	270	0.05341
271	0.00929	271	0.05324
272	0.00924	272	0.05306
273	0.00922	273	0.05289
274	0.00918	274	0.05273
275	0.00913	275	0.05255
276	0.0091	276	0.05236
277	0.00905	277	0.0522
278	0.00902	278	0.05206
279	0.00898	279	0.05189
280	0.00895	280	0.05172
281	0.00891	281	0.05157
282	0.00888	282	0.05141
283	0.00884	283	0.05125
284	0.0088	284	0.05108
285	0.00878	285	0.05092
286	0.00874	286	0.05075
287	0.0087	287	0.05059
288	0.00866	288	0.05043
289	0.00863	289	0.05028
290	0.0086	290	0.05014
291	0.00855	291	0.04998
292	0.00852	292	0.04984
293	0.00849	293	0.04968
294	0.00846	294	0.04953
295	0.00844	295	0.04936
296	0.0084	296	0.04922
297	0.00836	297	0.04907
298	0.00833	298	0.04894
299	0.00829	299	0.0488
300	0.00826	300	0.04865
301	0.00822	301	0.0485
302	0.0082	302	0.04837
303	0.00817	303	0.04822
304	0.00813	304	0.04807
305	0.0081	305	0.04792
306	0.00806	306	0.04776
307	0.00803	307	0.0476
308	0.00799	308	0.04746
309	0.00796	309	0.0473
310	0.00793	310	0.04717
311	0.00791	311	0.04703
312	0.00787	312	0.04689
313	0.00784	313	0.04676
314	0.0078	314	0.04663
315	0.00777	315	0.04649
316	0.00776	316	0.04636
317	0.00772	317	0.04624
318	0.00768	318	0.04612
319	0.00767	319	0.046
320	0.00764	320	0.04587
321	0.00762	321	0.04575
322	0.00758	322	0.04563
323	0.00756	323	0.0455
324	0.00753	324	0.04537
325	0.0075	325	0.04526
326	0.00747	326	0.04513
327	0.00745	327	0.045
328	0.00742	328	0.04489
329	0.00741	329	0.04477
330	0.00739	330	0.04466
331	0.00736	331	0.04454
332	0.00733	332	0.0444
333	0.00732	333	0.04429
334	0.00729	334	0.04417
335	0.00727	335	0.04406
336	0.00724	336	0.04394
337	0.00722	337	0.04384
338	0.00718	338	0.04373
339	0.00717	339	0.04362
340	0.00715	340	0.0435
341	0.00711	341	0.04338
342	0.00707	342	0.04327
343	0.00705	343	0.04315
344	0.00702	344	0.04304
345	0.00699	345	0.04292
346	0.00696	346	0.0428
347	0.00694	347	0.0427
348	0.00691	348	0.0426
349	0.00689	349	0.0425
350	0.00686	350	0.04239
351	0.00683	351	0.04228
352	0.00681	352	0.04216
353	0.00679	353	0.04205
354	0.00676	354	0.04193
355	0.00674	355	0.04181
356	0.00672	356	0.04168
357	0.0067	357	0.04157
358	0.00668	358	0.04145
359	0.00665	359	0.04133
360	0.00663	360	0.04123
361	0.00662	361	0.04112
362	0.00661	362	0.04101
363	0.00658	363	0.04088
364	0.00656	364	0.04077
365	0.00653	365	0.04066
366	0.00651	366	0.04054
367	0.00648	367	0.04044
368	0.00646	368	0.04034
369	0.00644	369	0.04023
370	0.00642	370	0.04012
371	0.0064	371	0.04004
372	0.00638	372	0.03992
373	0.00637	373	0.03981
374	0.00635	374	0.03972
375	0.00635	375	0.03962
376	0.00632	376	0.03952
377	0.0063	377	0.03941
378	0.00628	378	0.03931
379	0.00626	379	0.03921
380	0.00624	380	0.03911
381	0.00621	381	0.03901
382	0.0062	382	0.03891
383	0.00618	383	0.03883
384	0.00616	384	0.03873
385	0.00614	385	0.03863
386	0.00613	386	0.03855
387	0.0061	387	0.03846
388	0.00609	388	0.03838
389	0.00607	389	0.0383
390	0.00606	390	0.03821
391	0.00604	391	0.03813
392	0.00602	392	0.03805
393	0.006	393	0.03798
394	0.00597	394	0.03792
395	0.00595	395	0.03784
396	0.00592	396	0.03776
397	0.0059	397	0.03768
398	0.00589	398	0.03761
399	0.00587	399	0.03754
400	0.00584	400	0.03747
401	0.00582	401	0.03741
402	0.0058	402	0.03733
403	0.00578	403	0.03726
404	0.00576	404	0.03718
405	0.00574	405	0.03711
406	0.00572	406	0.03704
407	0.0057	407	0.03697
408	0.00569	408	0.03687
409	0.00567	409	0.03681
410	0.00565	410	0.03673
411	0.00564	411	0.03664
412	0.00562	412	0.03655
413	0.00561	413	0.03647
414	0.00559	414	0.03638
415	0.00558	415	0.03631
416	0.00556	416	0.03621
417	0.00554	417	0.03615
418	0.00552	418	0.03607
419	0.0055	419	0.03597
420	0.00548	420	0.03589
421	0.00547	421	0.03581
422	0.00545	422	0.03574
423	0.00543	423	0.03567
424	0.00541	424	0.0356
425	0.0054	425	0.03552
426	0.00539	426	0.03545
427	0.00537	427	0.03538
428	0.00535	428	0.03529
429	0.00533	429	0.03522
430	0.00531	430	0.03515
431	0.00529	431	0.03507
432	0.00527	432	0.03499
433	0.00526	433	0.03492
434	0.00524	434	0.03485
435	0.00523	435	0.03477
436	0.00522	436	0.03471
437	0.00521	437	0.03463
438	0.00519	438	0.03456
439	0.00518	439	0.03448
440	0.00517	440	0.03442
441	0.00516	441	0.03437
442	0.00515	442	0.03429
443	0.00513	443	0.03422
444	0.00513	444	0.03415
445	0.0051	445	0.03409
446	0.00509	446	0.03401
447	0.00508	447	0.03395
448	0.00507	448	0.03388
449	0.00506	449	0.03382
450	0.00505	450	0.03375
451	0.00503	451	0.03367
452	0.00502	452	0.0336
453	0.005	453	0.03353
454	0.00499	454	0.03346
455	0.00499	455	0.03338
456	0.00498	456	0.03331
457	0.00497	457	0.03323
458	0.00495	458	0.03317
459	0.00494	459	0.03311
460	0.00493	460	0.03305
461	0.00492	461	0.03299
462	0.0049	462	0.03292
463	0.0049	463	0.03285
464	0.00488	464	0.03278
465	0.00488	465	0.03271
466	0.00487	466	0.03265
467	0.00486	467	0.03258
468	0.00485	468	0.0325
469	0.00484	469	0.03243
470	0.00484	470	0.03236
471	0.00483	471	0.03229
472	0.00482	472	0.03222
473	0.00481	473	0.03216
474	0.0048	474	0.0321
475	0.00478	475	0.03204
476	0.00476	476	0.03198
477	0.00475	477	0.03192
478	0.00475	478	0.03188
479	0.00474	479	0.03183
480	0.00472	480	0.03178
481	0.00471	481	0.03172
482	0.0047	482	0.03165
483	0.00469	483	0.03159
484	0.00468	484	0.03154
485	0.00467	485	0.03148
486	0.00465	486	0.03142
487	0.00463	487	0.03138
488	0.00462	488	0.0313
489	0.0046	489	0.03124
490	0.00459	490	0.03117
491	0.00458	491	0.03111
492	0.00457	492	0.03104
493	0.00456	493	0.03099
494	0.00455	494	0.03092
495	0.00455	495	0.03085
496	0.00454	496	0.03079
497	0.00453	497	0.03073
498	0.00452	498	0.03067
499	0.0045	499	0.03061
500	0.0045	500	0.03054
501	0.00448	501	0.03047
502	0.00447	502	0.03042
503	0.00446	503	0.03034
504	0.00445	504	0.0303
505	0.00444	505	0.03023
506	0.00445	506	0.03017
507	0.00443	507	0.0301
508	0.00442	508	0.03005
509	0.00441	509	0.02999
510	0.00441	510	0.02993
511	0.00439	511	0.02987
512	0.00438	512	0.02981
513	0.00438	513	0.02974
514	0.00437	514	0.02969
515	0.00436	515	0.02964
516	0.00435	516	0.02958
517	0.00433	517	0.02953
518	0.00432	518	0.02948
519	0.00431	519	0.02944
520	0.00431	520	0.02941
521	0.00429	521	0.02936
522	0.00428	522	0.02931
523	0.00427	523	0.02926
524	0.00427	524	0.02921
525	0.00427	525	0.02917
526	0.00426	526	0.02913
527	0.00424	527	0.02907
528	0.00424	528	0.02902
529	0.00422	529	0.02897
530	0.00422	530	0.02892
531	0.00421	531	0.02886
532	0.00421	532	0.02882
533	0.00419	533	0.02877
534	0.00418	534	0.02873
535	0.00417	535	0.02867
536	0.00417	536	0.02863
537	0.00416	537	0.02858
538	0.00415	538	0.02854
539	0.00414	539	0.0285
540	0.00413	540	0.02846
541	0.00413	541	0.02842
542	0.00412	542	0.02837
543	0.00411	543	0.02832
544	0.00411	544	0.02828
545	0.0041	545	0.02824
546	0.00409	546	0.02821
547	0.00409	547	0.02815
548	0.00408	548	0.02811
549	0.00407	549	0.02806
550	0.00407	550	0.02802
551	0.00406	551	0.02797
552	0.00405	552	0.02792
553	0.00405	553	0.02788
554	0.00405	554	0.02783
555	0.00404	555	0.02779
556	0.00403	556	0.02775
557	0.00402	557	0.02772
558	0.00401	558	0.02768
559	0.00401	559	0.02764
560	0.00401	560	0.0276
561	0.004	561	0.02756
562	0.00399	562	0.02753
563	0.00399	563	0.02749
564	0.00397	564	0.02744
565	0.00397	565	0.0274
566	0.00397	566	0.02735
567	0.00396	567	0.02731
568	0.00395	568	0.02727
569	0.00394	569	0.02723
570	0.00394	570	0.02717
571	0.00392	571	0.02714
572	0.00392	572	0.0271
573	0.00391	573	0.02704
574	0.00391	574	0.02699
575	0.0039	575	0.02694
576	0.00389	576	0.02688
577	0.00389	577	0.02684
578	0.00388	578	0.0268
579	0.00388	579	0.02676
580	0.00387	580	0.02671
581	0.00386	581	0.02666
582	0.00385	582	0.02661
583	0.00384	583	0.02657
584	0.00383	584	0.02651
585	0.00383	585	0.02646
586	0.00382	586	0.02642
587	0.00381	587	0.02637
588	0.0038	588	0.02634
589	0.0038	589	0.02629
590	0.00378	590	0.02625
591	0.00379	591	0.02621
592	0.00378	592	0.02617
593	0.00378	593	0.02612
594	0.00376	594	0.02608
595	0.00376	595	0.02603
596	0.00376	596	0.02599
597	0.00374	597	0.02595
598	0.00373	598	0.02591
599	0.00373	599	0.02587
600	0.00373	600	0.02583
601	0.00372	601	0.0258
602	0.00371	602	0.02575
603	0.00371	603	0.02571
604	0.00369	604	0.02566
605	0.00369	605	0.02562
606	0.00368	606	0.02558
607	0.00367	607	0.02554
608	0.00366	608	0.02549
609	0.00365	609	0.02546
610	0.00365	610	0.02542
611	0.00364	611	0.02538
612	0.00363	612	0.02533
613	0.00363	613	0.0253
614	0.00361	614	0.02526
615	0.00361	615	0.02522
616	0.00361	616	0.02519
617	0.0036	617	0.02514
618	0.00359	618	0.02511
619	0.00359	619	0.02507
620	0.00357	620	0.02504
621	0.00357	621	0.025
622	0.00356	622	0.02495
623	0.00355	623	0.02492
624	0.00354	624	0.02488
625	0.00353	625	0.02482
626	0.00352	626	0.0248
627	0.00352	627	0.02477
628	0.00351	628	0.02473
629	0.0035	629	0.02469
630	0.00351	630	0.02465
631	0.0035	631	0.0246
632	0.00349	632	0.02457
633	0.00349	633	0.02454
634	0.00348	634	0.02449
635	0.00348	635	0.02446
636	0.00347	636	0.02443
637	0.00347	637	0.02439
638	0.00346	638	0.02435
639	0.00346	639	0.02432
640	0.00345	640	0.02427
641	0.00345	641	0.02425
642	0.00343	642	0.02421
643	0.00342	643	0.02418
644	0.00341	644	0.02413
645	0.00342	645	0.0241
646	0.00341	646	0.02406
647	0.00341	647	0.02403
648	0.0034	648	0.02398
649	0.00339	649	0.02395
650	0.00338	650	0.02392
651	0.00338	651	0.0239
652	0.00337	652	0.02387
653	0.00336	653	0.02383
654	0.00335	654	0.02381
655	0.00335	655	0.02377
656	0.00334	656	0.02373
657	0.00334	657	0.0237
658	0.00333	658	0.02367
659	0.00332	659	0.02364
660	0.00332	660	0.02361
661	0.00331	661	0.02358
662	0.00331	662	0.02355
663	0.0033	663	0.02351
664	0.0033	664	0.02347
665	0.00328	665	0.02342
666	0.00327	666	0.0234
667	0.00328	667	0.02337
668	0.00328	668	0.02333
669	0.00327	669	0.02331
670	0.00327	670	0.02329
671	0.00327	671	0.02325
672	0.00327	672	0.02321
673	0.00326	673	0.02317
674	0.00325	674	0.02314
675	0.00325	675	0.02312
676	0.00324	676	0.02307
677	0.00324	677	0.02304
678	0.00322	678	0.02301
679	0.00322	679	0.02297
680	0.00321	680	0.02294
681	0.0032	681	0.0229
682	0.0032	682	0.02286
683	0.00318	683	0.02283
684	0.00319	684	0.0228
685	0.00318	685	0.02277
686	0.00318	686	0.02274
687	0.00318	687	0.02271
688	0.00317	688	0.02269
689	0.00316	689	0.02266
690	0.00316	690	0.02263
691	0.00316	691	0.02261
692	0.00316	692	0.02258
693	0.00316	693	0.02254
694	0.00316	694	0.02251
695	0.00316	695	0.02247
696	0.00316	696	0.02244
697	0.00316	697	0.02241
698	0.00315	698	0.02237
699	0.00314	699	0.02234
700	0.00314	700	0.02231
701	0.00313	701	0.02228
702	0.00313	702	0.02224
703	0.00312	703	0.02221
704	0.00311	704	0.02218
705	0.00311	705	0.02215
706	0.0031	706	0.02211
707	0.00309	707	0.02209
708	0.00309	708	0.02206
709	0.00308	709	0.02203
710	0.00308	710	0.022
711	0.00307	711	0.02196
712	0.00306	712	0.02192
713	0.00306	713	0.02189
714	0.00306	714	0.02185
715	0.00306	715	0.02182
716	0.00306	716	0.02179
717	0.00305	717	0.02175
718	0.00305	718	0.02171
719	0.00304	719	0.02168
720	0.00304	720	0.02165
721	0.00304	721	0.02161
722	0.00303	722	0.02158
723	0.00302	723	0.02155
724	0.00302	724	0.02151
725	0.00302	725	0.02148
726	0.00302	726	0.02146
727	0.00302	727	0.02142
728	0.00301	728	0.02139
729	0.00301	729	0.02136
730	0.00301	730	0.02132
731	0.00301	731	0.02129
732	0.003	732	0.02126
733	0.00299	733	0.02125
734	0.00299	734	0.02122
735	0.00298	735	0.02119
736	0.00298	736	0.02117
737	0.00297	737	0.02114
738	0.00296	738	0.0211
739	0.00296	739	0.02108
740	0.00296	740	0.02105
741	0.00296	741	0.02102
742	0.00295	742	0.02098
743	0.00294	743	0.02095
744	0.00295	744	0.02092
745	0.00295	745	0.02089
746	0.00294	746	0.02086
747	0.00294	747	0.02084
748	0.00294	748	0.02081
749	0.00293	749	0.02079
750	0.00293	750	0.02075
751	0.00292	751	0.02072
752	0.00292	752	0.02068
753	0.00292	753	0.02066
754	0.00291	754	0.02063
755	0.0029	755	0.0206
756	0.0029	756	0.02057
757	0.0029	757	0.02054
758	0.00289	758	0.02051
759	0.0029	759	0.02048
760	0.00289	760	0.02045
761	0.00289	761	0.02042
762	0.00288	762	0.02039
763	0.00287	763	0.02036
764	0.00287	764	0.02033
765	0.00287	765	0.02032
766	0.00287	766	0.02029
767	0.00287	767	0.02026
768	0.00286	768	0.02023
769	0.00286	769	0.02021
770	0.00286	770	0.02019
771	0.00286	771	0.02018
772	0.00285	772	0.02015
773	0.00284	773	0.02014
774	0.00284	774	0.02011
775	0.00283	775	0.0201
776	0.00283	776	0.02008
777	0.00282	777	0.02007
778	0.00282	778	0.02004
779	0.00282	779	0.02003
780	0.00282	780	0.02001
781	0.0028	781	0.01999
782	0.0028	782	0.01997
783	0.00281	783	0.01994
784	0.0028	784	0.01993
785	0.0028	785	0.01991
786	0.0028	786	0.0199
787	0.0028	787	0.01988
788	0.00279	788	0.01985
789	0.00278	789	0.01983
790	0.00278	790	0.0198
791	0.00278	791	0.01977
792	0.00277	792	0.01976
793	0.00276	793	0.01974
794	0.00277	794	0.01972
795	0.00276	795	0.0197
796	0.00276	796	0.01969
797	0.00275	797	0.01968
798	0.00275	798	0.01967
799	0.00274	799	0.01966
800	0.00274	800	0.01964
801	0.00274	801	0.01962
802	0.00274	802	0.0196
803	0.00273	803	0.0196
804	0.00273	804	0.01958
805	0.00272	805	0.01956
806	0.00272	806	0.01953
807	0.00271	807	0.01951
808	0.00271	808	0.0195
809	0.00271	809	0.01948
810	0.00271	810	0.01947
811	0.00271	811	0.01945
812	0.00271	812	0.01942
813	0.0027	813	0.01942
814	0.0027	814	0.01941
815	0.0027	815	0.01939
816	0.0027	816	0.01937
817	0.00269	817	0.01936
818	0.0027	818	0.01934
819	0.00269	819	0.01932
820	0.00268	820	0.0193
821	0.00269	821	0.01928
822	0.00268	822	0.01926
823	0.00268	823	0.01925
824	0.00268	824	0.01922
825	0.00268	825	0.0192
826	0.00267	826	0.01919
827	0.00266	827	0.01917
828	0.00266	828	0.01916
829	0.00267	829	0.01914
830	0.00266	830	0.01911
831	0.00265	831	0.01908
832	0.00264	832	0.01907
833	0.00264	833	0.01905
834	0.00264	834	0.01902
835	0.00263	835	0.019
836	0.00263	836	0.01898
837	0.00262	837	0.01895
838	0.00263	838	0.01893
839	0.00262	839	0.01891
840	0.00262	840	0.0189
841	0.00262	841	0.01888
842	0.00261	842	0.01886
843	0.00261	843	0.01883
844	0.0026	844	0.01881
845	0.0026	845	0.01879
846	0.00259	846	0.01876
847	0.00259	847	0.01875
848	0.00259	848	0.01872
849	0.00259	849	0.01869
850	0.00259	850	0.01866
851	0.00258	851	0.01864
852	0.00257	852	0.01863
853	0.00257	853	0.01861
854	0.00257	854	0.01858
855	0.00257	855	0.01856
856	0.00257	856	0.01853
857	0.00257	857	0.01851
858	0.00257	858	0.01849
859	0.00256	859	0.01847
860	0.00255	860	0.01845
861	0.00254	861	0.01843
862	0.00254	862	0.0184
863	0.00253	863	0.01838
864	0.00254	864	0.01835
865	0.00253	865	0.01832
866	0.00253	866	0.01831
867	0.00252	867	0.01829
868	0.00252	868	0.01827
869	0.00253	869	0.01824
870	0.00252	870	0.01823
871	0.00252	871	0.01823
872	0.00252	872	0.01821
873	0.00252	873	0.01818
874	0.00252	874	0.01816
875	0.00252	875	0.01814
876	0.00253	876	0.01811
877	0.00252	877	0.0181
878	0.00252	878	0.01806
879	0.00251	879	0.01804
880	0.00251	880	0.01803
881	0.00251	881	0.018
882	0.00251	882	0.01797
883	0.00251	883	0.01794
884	0.00251	884	0.01793
885	0.0025	885	0.01791
886	0.0025	886	0.01789
887	0.00249	887	0.01788
888	0.0025	888	0.01787
889	0.0025	889	0.01785
890	0.0025	890	0.01784
891	0.00249	891	0.01781
892	0.0025	892	0.01779
893	0.00249	893	0.01777
894	0.00249	894	0.01773
895	0.00249	895	0.01772
896	0.00249	896	0.0177
897	0.00248	897	0.01769
898	0.00248	898	0.01766
899	0.00248	899	0.01763
900	0.00247	900	0.01761
901	0.00248	901	0.01759
902	0.00248	902	0.01758
903	0.00247	903	0.01756
904	0.00247	904	0.01754
905	0.00247	905	0.01753
906	0.00247	906	0.01751
907	0.00246	907	0.0175
908	0.00246	908	0.01748
909	0.00246	909	0.01746
910	0.00245	910	0.01744
911	0.00246	911	0.01743
912	0.00245	912	0.01741
913	0.00245	913	0.0174
914	0.00245	914	0.01739
915	0.00246	915	0.01736
916	0.00245	916	0.01734
917	0.00244	917	0.01732
918	0.00244	918	0.0173
919	0.00244	919	0.01727
920	0.00244	920	0.01725
921	0.00244	921	0.01724
922	0.00244	922	0.01722
923	0.00244	923	0.01719
924	0.00243	924	0.01718
925	0.00243	925	0.01716
926	0.00243	926	0.01715
927	0.00243	927	0.01713
928	0.00242	928	0.01712
929	0.00242	929	0.01711
930	0.00242	930	0.01708
931	0.00241	931	0.01706
932	0.00241	932	0.01704
933	0.00241	933	0.01702
934	0.0024	934	0.01701
935	0.0024	935	0.01699
936	0.0024	936	0.01696
937	0.00239	937	0.01695
938	0.00239	938	0.01692
939	0.0024	939	0.01691
940	0.00239	940	0.01689
941	0.00239	941	0.01687
942	0.00239	942	0.01685
943	0.00238	943	0.01683
944	0.00239	944	0.01681
945	0.00238	945	0.01679
946	0.00238	946	0.01677
947	0.00237	947	0.01676
948	0.00237	948	0.01674
949	0.00236	949	0.01671
950	0.00236	950	0.01669
951	0.00236	951	0.01668
952	0.00236	952	0.01667
953	0.00235	953	0.01665
954	0.00234	954	0.01664
955	0.00235	955	0.01662
956	0.00234	956	0.0166
957	0.00234	957	0.01659
958	0.00233	958	0.01658
959	0.00233	959	0.01657
960	0.00233	960	0.01655
961	0.00233	961	0.01654
962	0.00232	962	0.01652
963	0.00232	963	0.0165
964	0.00232	964	0.01649
965	0.00233	965	0.01648
966	0.00232	966	0.01646
967	0.00233	967	0.01644
968	0.00233	968	0.01642
969	0.00233	969	0.01641
970	0.00232	970	0.01638
971	0.00232	971	0.01637
972	0.00231	972	0.01636
973	0.00231	973	0.01634
974	0.00231	974	0.01631
975	0.0023	975	0.01629
976	0.0023	976	0.01627
977	0.0023	977	0.01626
978	0.00229	978	0.01624
979	0.00229	979	0.01622
980	0.00229	980	0.0162
981	0.00229	981	0.01619
982	0.00229	982	0.01617
983	0.00228	983	0.01615
984	0.00228	984	0.01613
985	0.00228	985	0.01611
986	0.00228	986	0.0161
987	0.00227	987	0.01608
988	0.00226	988	0.01606
989	0.00227	989	0.01605
990	0.00226	990	0.01603
991	0.00226	991	0.016
992	0.00226	992	0.016
993	0.00226	993	0.01597
994	0.00226	994	0.01596
995	0.00226	995	0.01594
996	0.00226	996	0.01593
997	0.00225	997	0.01592
998	0.00225	998	0.01591
999	0.00224	999	0.0159
1000	0.00225	1000	0.01588
1001	0.00224	1001	0.01587
1002	0.00224	1002	0.01586
1003	0.00225	1003	0.01586
1004	0.00225	1004	0.01585
1005	0.00225	1005	0.01584
1006	0.00225	1006	0.01582
1007	0.00225	1007	0.01581
1008	0.00225	1008	0.0158
1009	0.00225	1009	0.01579
1010	0.00224	1010	0.01578
1011	0.00224	1011	0.01577
1012	0.00224	1012	0.01577
1013	0.00224	1013	0.01575
1014	0.00224	1014	0.01575
1015	0.00224	1015	0.01574
1016	0.00224	1016	0.01572
1017	0.00223	1017	0.01571
1018	0.00223	1018	0.01571
1019	0.00223	1019	0.01571
1020	0.00223	1020	0.0157
1021	0.00223	1021	0.01568
1022	0.00223	1022	0.01568
1023	0.00222	1023	0.01567
1024	0.00222	1024	0.01566
1025	0.00222	1025	0.01564
1026	0.00222	1026	0.01562
1027	0.00222	1027	0.01561
1028	0.00222	1028	0.01559
1029	0.00222	1029	0.01557
1030	0.00222	1030	0.01556
1031	0.00222	1031	0.01554
1032	0.00222	1032	0.01553
1033	0.00222	1033	0.01551
1034	0.00221	1034	0.01549
1035	0.00221	1035	0.01548
1036	0.00221	1036	0.01546
1037	0.00221	1037	0.01545
1038	0.0022	1038	0.01544
1039	0.0022	1039	0.01542
1040	0.0022	1040	0.01541
1041	0.0022	1041	0.01539
1042	0.0022	1042	0.01538
1043	0.0022	1043	0.01537
1044	0.0022	1044	0.01535
1045	0.00219	1045	0.01532
1046	0.00218	1046	0.01531
1047	0.00218	1047	0.0153
1048	0.00218	1048	0.01528
1049	0.00217	1049	0.01526
1050	0.00217	1050	0.01525
1051	0.00217	1051	0.01525
1052	0.00216	1052	0.01523
1053	0.00216	1053	0.01522
1054	0.00216	1054	0.01521
1055	0.00216	1055	0.01519
1056	0.00216	1056	0.01518
1057	0.00216	1057	0.01515
1058	0.00216	1058	0.01513
1059	0.00216	1059	0.0151
1060	0.00216	1060	0.01509
1061	0.00216	1061	0.01508
1062	0.00215	1062	0.01507
1063	0.00215	1063	0.01506
1064	0.00215	1064	0.01505
1065	0.00215	1065	0.01503
1066	0.00215	1066	0.01502
1067	0.00215	1067	0.015
1068	0.00215	1068	0.01498
1069	0.00215	1069	0.01497
1070	0.00215	1070	0.01496
1071	0.00215	1071	0.01495
1072	0.00215	1072	0.01493
1073	0.00215	1073	0.01491
1074	0.00215	1074	0.01489
1075	0.00214	1075	0.01489
1076	0.00214	1076	0.01487
1077	0.00213	1077	0.01486
1078	0.00213	1078	0.01485
1079	0.00213	1079	0.01484
1080	0.00213	1080	0.01482
1081	0.00213	1081	0.01481
1082	0.00213	1082	0.01479
1083	0.00214	1083	0.01478
1084	0.00214	1084	0.01477
1085	0.00213	1085	0.01476
1086	0.00214	1086	0.01474
1087	0.00213	1087	0.01473
1088	0.00213	1088	0.01471
1089	0.00213	1089	0.0147
1090	0.00213	1090	0.01469
1091	0.00213	1091	0.01468
1092	0.00213	1092	0.01466
1093	0.00213	1093	0.01464
1094	0.00213	1094	0.01464
1095	0.00213	1095	0.01462
1096	0.00213	1096	0.0146
1097	0.00213	1097	0.01461
1098	0.00213	1098	0.0146
1099	0.00213	1099	0.01458
1100	0.00213	1100	0.01456
1101	0.00213	1101	0.01455
1102	0.00213	1102	0.01453
1103	0.00212	1103	0.01452
1104	0.00212	1104	0.01451
1105	0.00211	1105	0.0145
1106	0.00211	1106	0.01449
1107	0.00211	1107	0.01448
1108	0.00211	1108	0.01448
1109	0.00211	1109	0.01447
1110	0.0021	1110	0.01446
1111	0.0021	1111	0.01445
1112	0.0021	1112	0.01444
1113	0.00209	1113	0.01443
1114	0.00209	1114	0.01441
1115	0.00209	1115	0.01439
1116	0.00209	1116	0.01439
1117	0.00209	1117	0.01438
1118	0.00208	1118	0.01437
1119	0.00209	1119	0.01436
1120	0.00209	1120	0.01436
1121	0.00209	1121	0.01435
1122	0.00209	1122	0.01434
1123	0.00209	1123	0.01433
1124	0.00209	1124	0.01433
1125	0.00209	1125	0.01433
1126	0.00209	1126	0.01432
1127	0.00208	1127	0.01432
1128	0.00208	1128	0.0143
1129	0.00208	1129	0.01429
1130	0.00207	1130	0.01429
1131	0.00207	1131	0.01428
1132	0.00207	1132	0.01428
1133	0.00206	1133	0.01427
1134	0.00206	1134	0.01426
1135	0.00206	1135	0.01426
1136	0.00207	1136	0.01424
1137	0.00207	1137	0.01423
1138	0.00206	1138	0.01422
1139	0.00207	1139	0.01421
1140	0.00207	1140	0.01419
1141	0.00207	1141	0.01419
1142	0.00207	1142	0.01416
1143	0.00207	1143	0.01414
1144	0.00207	1144	0.01412
1145	0.00207	1145	0.01411
1146	0.00208	1146	0.01409
1147	0.00207	1147	0.01407
1148	0.00208	1148	0.01406
1149	0.00207	1149	0.01405
1150	0.00207	1150	0.01404
1151	0.00206	1151	0.01403
1152	0.00206	1152	0.01402
1153	0.00206	1153	0.01401
1154	0.00206	1154	0.01399
1155	0.00206	1155	0.01399
1156	0.00206	1156	0.01398
1157	0.00206	1157	0.01396
1158	0.00206	1158	0.01395
1159	0.00206	1159	0.01394
1160	0.00206	1160	0.01393
1161	0.00206	1161	0.01392
1162	0.00206	1162	0.0139
1163	0.00205	1163	0.01388
1164	0.00205	1164	0.01387
1165	0.00205	1165	0.01387
1166	0.00205	1166	0.01385
1167	0.00205	1167	0.01384
1168	0.00205	1168	0.01382
1169	0.00205	1169	0.01381
1170	0.00205	1170	0.01379
1171	0.00204	1171	0.01378
1172	0.00205	1172	0.01377
1173	0.00205	1173	0.01376
1174	0.00204	1174	0.01375
1175	0.00204	1175	0.01374
1176	0.00204	1176	0.01372
1177	0.00204	1177	0.01371
1178	0.00203	1178	0.01369
1179	0.00203	1179	0.01367
1180	0.00203	1180	0.01367
1181	0.00203	1181	0.01365
1182	0.00203	1182	0.01363
1183	0.00203	1183	0.01362
1184	0.00203	1184	0.01361
1185	0.00203	1185	0.0136
1186	0.00202	1186	0.0136
1187	0.00203	1187	0.01359
1188	0.00202	1188	0.01358
1189	0.00202	1189	0.01358
1190	0.00202	1190	0.01357
1191	0.00202	1191	0.01357
1192	0.00202	1192	0.01357
1193	0.00202	1193	0.01355
1194	0.00202	1194	0.01354
1195	0.00201	1195	0.01353
1196	0.00201	1196	0.01352
1197	0.00201	1197	0.01351
1198	0.00201	1198	0.0135
1199	0.00201	1199	0.01349
1200	0.00201	1200	0.01347
1201	0.00201	1201	0.01346
1202	0.00201	1202	0.01345
1203	0.00201	1203	0.01343
1204	0.00201	1204	0.01343
1205	0.00201	1205	0.01342
1206	0.00201	1206	0.01341
1207	0.00201	1207	0.0134
1208	0.00201	1208	0.0134
1209	0.002	1209	0.01339
1210	0.002	1210	0.01337
1211	0.002	1211	0.01335
1212	0.002	1212	0.01334
1213	0.002	1213	0.01332
1214	0.00199	1214	0.01331
1215	0.00199	1215	0.01329
1216	0.00199	1216	0.01328
1217	0.00198	1217	0.01326
1218	0.00199	1218	0.01326
1219	0.00198	1219	0.01325
1220	0.00198	1220	0.01324
1221	0.00198	1221	0.01324
1222	0.00197	1222	0.01323
1223	0.00197	1223	0.01322
1224	0.00196	1224	0.0132
1225	0.00196	1225	0.01318
1226	0.00196	1226	0.01316
1227	0.00196	1227	0.01316
1228	0.00197	1228	0.01314
1229	0.00196	1229	0.01312
1230	0.00196	1230	0.0131
1231	0.00196	1231	0.0131
1232	0.00196	1232	0.01309
1233	0.00196	1233	0.01308
1234	0.00196	1234	0.01307
1235	0.00196	1235	0.01306
1236	0.00196	1236	0.01305
1237	0.00196	1237	0.01304
1238	0.00195	1238	0.01303
1239	0.00196	1239	0.01302
1240	0.00195	1240	0.013
1241	0.00195	1241	0.01299
1242	0.00196	1242	0.01298
1243	0.00195	1243	0.01297
1244	0.00195	1244	0.01296
1245	0.00195	1245	0.01295
1246	0.00195	1246	0.01295
1247	0.00195	1247	0.01293
1248	0.00195	1248	0.01292
1249	0.00195	1249	0.01291
1250	0.00195	1250	0.01289
1251	0.00195	1251	0.01288
1252	0.00194	1252	0.01288
1253	0.00194	1253	0.01287
1254	0.00195	1254	0.01286
1255	0.00195	1255	0.01285
1256	0.00195	1256	0.01284
1257	0.00195	1257	0.01283
1258	0.00195	1258	0.01282
1259	0.00195	1259	0.01281
1260	0.00195	1260	0.01281
1261	0.00195	1261	0.0128
1262	0.00196	1262	0.0128
1263	0.00194	1263	0.0128
1264	0.00195	1264	0.01278
1265	0.00195	1265	0.01277
1266	0.00194	1266	0.01275
1267	0.00194	1267	0.01274
1268	0.00194	1268	0.01273
1269	0.00194	1269	0.01273
1270	0.00193	1270	0.01272
1271	0.00193	1271	0.0127
1272	0.00193	1272	0.0127
1273	0.00193	1273	0.01269
1274	0.00193	1274	0.01269
1275	0.00193	1275	0.01268
1276	0.00193	1276	0.01267
1277	0.00193	1277	0.01266
1278	0.00194	1278	0.01265
1279	0.00194	1279	0.01264
1280	0.00194	1280	0.01263
1281	0.00193	1281	0.01262
1282	0.00193	1282	0.01261
1283	0.00194	1283	0.01261
1284	0.00194	1284	0.0126
1285	0.00194	1285	0.01259
1286	0.00194	1286	0.01258
1287	0.00194	1287	0.01257
1288	0.00194	1288	0.01257
1289	0.00193	1289	0.01256
1290	0.00193	1290	0.01256
1291	0.00193	1291	0.01255
1292	0.00193	1292	0.01254
1293	0.00193	1293	0.01254
1294	0.00192	1294	0.01253
1295	0.00192	1295	0.01252
1296	0.00191	1296	0.01251
1297	0.00191	1297	0.0125
1298	0.00191	1298	0.0125
1299	0.0019	1299	0.01249
1300	0.00191	1300	0.01249
1301	0.00191	1301	0.01248
1302	0.00191	1302	0.01247
1303	0.0019	1303	0.01246
1304	0.0019	1304	0.01244
1305	0.0019	1305	0.01244
1306	0.0019	1306	0.01243
1307	0.0019	1307	0.01243
1308	0.0019	1308	0.01242
1309	0.0019	1309	0.01242
1310	0.00189	1310	0.01242
1311	0.00189	1311	0.01241
1312	0.00189	1312	0.0124
1313	0.00188	1313	0.0124
1314	0.00187	1314	0.01239
1315	0.00187	1315	0.01239
1316	0.00187	1316	0.01238
1317	0.00187	1317	0.01239
1318	0.00187	1318	0.01238
1319	0.00187	1319	0.01237
1320	0.00187	1320	0.01236
1321	0.00187	1321	0.01236
1322	0.00188	1322	0.01236
1323	0.00187	1323	0.01235
1324	0.00187	1324	0.01235
1325	0.00187	1325	0.01234
1326	0.00186	1326	0.01233
1327	0.00186	1327	0.01233
1328	0.00186	1328	0.01231
1329	0.00186	1329	0.0123
1330	0.00186	1330	0.01229
1331	0.00186	1331	0.01228
1332	0.00186	1332	0.01227
1333	0.00186	1333	0.01226
1334	0.00186	1334	0.01225
1335	0.00186	1335	0.01223
1336	0.00185	1336	0.01222
1337	0.00185	1337	0.01222
1338	0.00185	1338	0.01221
1339	0.00185	1339	0.0122
1340	0.00185	1340	0.01219
1341	0.00185	1341	0.01218
1342	0.00185	1342	0.01218
1343	0.00184	1343	0.01217
1344	0.00185	1344	0.01215
1345	0.00185	1345	0.01216
1346	0.00185	1346	0.01216
1347	0.00184	1347	0.01215
1348	0.00184	1348	0.01214
1349	0.00185	1349	0.01213
1350	0.00184	1350	0.01212
1351	0.00184	1351	0.01211
1352	0.00184	1352	0.01211
1353	0.00184	1353	0.01209
1354	0.00184	1354	0.01209
1355	0.00184	1355	0.01208
1356	0.00183	1356	0.01207
1357	0.00183	1357	0.01206
1358	0.00183	1358	0.01205
1359	0.00184	1359	0.01204
1360	0.00184	1360	0.01204
1361	0.00184	1361	0.01204
1362	0.00184	1362	0.01203
1363	0.00184	1363	0.01202
1364	0.00183	1364	0.01201
1365	0.00183	1365	0.01201
1366	0.00183	1366	0.012
1367	0.00183	1367	0.01199
1368	0.00183	1368	0.01198
1369	0.00183	1369	0.01198
1370	0.00183	1370	0.01197
1371	0.00183	1371	0.01197
1372	0.00182	1372	0.01196
1373	0.00182	1373	0.01195
1374	0.00182	1374	0.01194
1375	0.00182	1375	0.01193
1376	0.00181	1376	0.01193
1377	0.00181	1377	0.01192
1378	0.00182	1378	0.01191
1379	0.00181	1379	0.01189
1380	0.00182	1380	0.01189
1381	0.00182	1381	0.01188
1382	0.00182	1382	0.01188
1383	0.00182	1383	0.01186
1384	0.00181	1384	0.01187
1385	0.00181	1385	0.01185
1386	0.00181	1386	0.01185
1387	0.00181	1387	0.01185
1388	0.00182	1388	0.01184
1389	0.00182	1389	0.01184
1390	0.00182	1390	0.01183
1391	0.00182	1391	0.01182
1392	0.00182	1392	0.01182
1393	0.00182	1393	0.01182
1394	0.00182	1394	0.01182
1395	0.00182	1395	0.01181
1396	0.00181	1396	0.01181
1397	0.00181	1397	0.0118
1398	0.00181	1398	0.01179
1399	0.00181	1399	0.01178
1400	0.00181	1400	0.01176
1401	0.00181	1401	0.01175
1402	0.00181	1402	0.01174
1403	0.00181	1403	0.01173
1404	0.00181	1404	0.01172
1405	0.00181	1405	0.01171
1406	0.0018	1406	0.01169
1407	0.0018	1407	0.01169
1408	0.0018	1408	0.01168
1409	0.0018	1409	0.01167
1410	0.0018	1410	0.01166
1411	0.0018	1411	0.01167
1412	0.0018	1412	0.01165
1413	0.0018	1413	0.01164
1414	0.0018	1414	0.01164
1415	0.0018	1415	0.01163
1416	0.0018	1416	0.01162
1417	0.00181	1417	0.01162
1418	0.0018	1418	0.01162
1419	0.00181	1419	0.01161
1420	0.00181	1420	0.01161
1421	0.00181	1421	0.01161
1422	0.0018	1422	0.0116
1423	0.0018	1423	0.01159
1424	0.00181	1424	0.01158
1425	0.00181	1425	0.01158
1426	0.00181	1426	0.01157
1427	0.0018	1427	0.01156
1428	0.0018	1428	0.01155
1429	0.0018	1429	0.01155
1430	0.0018	1430	0.01155
1431	0.0018	1431	0.01155
1432	0.0018	1432	0.01154
1433	0.0018	1433	0.01155
1434	0.0018	1434	0.01153
1435	0.0018	1435	0.01152
1436	0.00179	1436	0.01151
1437	0.0018	1437	0.01151
1438	0.0018	1438	0.0115
1439	0.00179	1439	0.0115
1440	0.0018	1440	0.0115
1441	0.00179	1441	0.0115
1442	0.00179	1442	0.0115
1443	0.00179	1443	0.01151
1444	0.00179	1444	0.01151
1445	0.00179	1445	0.01151
1446	0.00179	1446	0.0115
1447	0.00179	1447	0.0115
1448	0.00179	1448	0.01149
1449	0.00179	1449	0.01149
1450	0.00179	1450	0.01148
1451	0.0018	1451	0.01148
1452	0.0018	1452	0.01148
1453	0.0018	1453	0.01147
1454	0.0018	1454	0.01146
1455	0.0018	1455	0.01146
1456	0.0018	1456	0.01146
1457	0.0018	1457	0.01145
1458	0.0018	1458	0.01144
1459	0.00179	1459	0.01144
1460	0.00179	1460	0.01144
1461	0.00179	1461	0.01144
1462	0.0018	1462	0.01143
1463	0.00179	1463	0.01143
1464	0.00179	1464	0.01142
1465	0.00179	1465	0.01142
1466	0.00179	1466	0.01141
1467	0.00179	1467	0.01141
1468	0.00178	1468	0.0114
1469	0.00179	1469	0.01139
1470	0.00179	1470	0.01139
1471	0.00179	1471	0.01138
1472	0.00178	1472	0.01138
1473	0.00178	1473	0.01137
1474	0.00177	1474	0.01137
1475	0.00177	1475	0.01137
1476	0.00177	1476	0.01137
1477	0.00177	1477	0.01137
1478	0.00177	1478	0.01136
1479	0.00177	1479	0.01136
1480	0.00178	1480	0.01136
1481	0.00178	1481	0.01135
1482	0.00177	1482	0.01136
1483	0.00177	1483	0.01136
1484	0.00177	1484	0.01135
1485	0.00176	1485	0.01134
1486	0.00177	1486	0.01134
1487	0.00176	1487	0.01133
1488	0.00176	1488	0.01133
1489	0.00176	1489	0.01132
1490	0.00176	1490	0.01133
1491	0.00177	1491	0.01133
1492	0.00176	1492	0.01133
1493	0.00177	1493	0.01132
1494	0.00176	1494	0.01132
1495	0.00176	1495	0.01132
1496	0.00177	1496	0.01132
1497	0.00177	1497	0.01131
1498	0.00176	1498	0.0113
1499	0.00176	1499	0.01129
1500	0.00176	1500	0.01128
1501	0.00176	1501	0.01127
1502	0.00176	1502	0.01127
1503	0.00175	1503	0.01126
1504	0.00175	1504	0.01126
1505	0.00175	1505	0.01124
1506	0.00175	1506	0.01123
1507	0.00174	1507	0.01123
1508	0.00174	1508	0.01122
1509	0.00174	1509	0.01122
1510	0.00175	1510	0.0112
1511	0.00175	1511	0.0112
1512	0.00175	1512	0.01118
1513	0.00175	1513	0.01118
1514	0.00175	1514	0.01117
1515	0.00174	1515	0.01115
1516	0.00174	1516	0.01115
1517	0.00174	1517	0.01114
1518	0.00174	1518	0.01114
1519	0.00174	1519	0.01114
1520	0.00175	1520	0.01113
1521	0.00174	1521	0.01113
1522	0.00174	1522	0.01112
1523	0.00174	1523	0.01111
1524	0.00174	1524	0.01111
1525	0.00174	1525	0.01111
1526	0.00174	1526	0.0111
1527	0.00174	1527	0.0111
1528	0.00174	1528	0.01109
1529	0.00173	1529	0.01107
1530	0.00174	1530	0.01107
1531	0.00174	1531	0.01106
1532	0.00173	1532	0.01106
1533	0.00174	1533	0.01105
1534	0.00174	1534	0.01104
1535	0.00174	1535	0.01104
1536	0.00173	1536	0.01104
1537	0.00174	1537	0.01103
1538	0.00173	1538	0.01102
1539	0.00174	1539	0.01103
1540	0.00174	1540	0.01102
1541	0.00173	1541	0.01102
1542	0.00173	1542	0.01102
1543	0.00172	1543	0.01102
1544	0.00172	1544	0.01101
1545	0.00173	1545	0.01101
1546	0.00172	1546	0.011
1547	0.00172	1547	0.011
1548	0.00173	1548	0.01099
1549	0.00173	1549	0.01097
1550	0.00173	1550	0.01097
1551	0.00173	1551	0.01096
1552	0.00173	1552	0.01096
1553	0.00172	1553	0.01096
1554	0.00173	1554	0.01095
1555	0.00172	1555	0.01095
1556	0.00172	1556	0.01093
1557	0.00173	1557	0.01092
1558	0.00172	1558	0.01091
1559	0.00172	1559	0.0109
1560	0.00172	1560	0.01088
1561	0.00172	1561	0.01088
1562	0.00172	1562	0.01087
1563	0.00172	1563	0.01087
1564	0.00172	1564	0.01085
1565	0.00172	1565	0.01084
1566	0.00172	1566	0.01084
1567	0.00172	1567	0.01083
1568	0.00172	1568	0.01082
1569	0.00172	1569	0.01083
1570	0.00172	1570	0.01082
1571	0.00172	1571	0.01081
1572	0.00172	1572	0.0108
1573	0.00172	1573	0.0108
1574	0.00172	1574	0.0108
1575	0.00172	1575	0.01079
1576	0.00171	1576	0.01078
1577	0.00171	1577	0.01078
1578	0.00172	1578	0.01077
1579	0.00171	1579	0.01077
1580	0.00171	1580	0.01076
1581	0.00171	1581	0.01076
1582	0.00171	1582	0.01076
1583	0.00171	1583	0.01076
1584	0.00172	1584	0.01076
1585	0.00171	1585	0.01076
1586	0.00171	1586	0.01076
1587	0.00172	1587	0.01076
1588	0.00171	1588	0.01075
1589	0.00172	1589	0.01075
1590	0.00172	1590	0.01075
1591	0.00171	1591	0.01075
1592	0.00171	1592	0.01075
1593	0.00171	1593	0.01075
1594	0.00171	1594	0.01076
1595	0.0017	1595	0.01076
1596	0.0017	1596	0.01076
1597	0.0017	1597	0.01076
1598	0.0017	1598	0.01076
1599	0.0017	1599	0.01075
1600	0.0017	1600	0.01074
1601	0.0017	1601	0.01073
1602	0.0017	1602	0.01073
1603	0.0017	1603	0.01072
1604	0.0017	1604	0.01072
1605	0.0017	1605	0.01071
1606	0.0017	1606	0.0107
1607	0.00169	1607	0.01069
1608	0.00169	1608	0.01068
1609	0.00169	1609	0.01066
1610	0.00169	1610	0.01064
1611	0.00168	1611	0.01063
1612	0.00168	1612	0.01063
1613	0.00168	1613	0.01063
1614	0.00168	1614	0.01062
1615	0.00168	1615	0.0106
1616	0.00168	1616	0.0106
1617	0.00168	1617	0.01059
1618	0.00169	1618	0.01059
1619	0.00168	1619	0.01058
1620	0.00168	1620	0.01058
1621	0.00168	1621	0.01057
1622	0.00168	1622	0.01057
1623	0.00168	1623	0.01056
1624	0.00168	1624	0.01056
1625	0.00167	1625	0.01055
1626	0.00168	1626	0.01054
1627	0.00168	1627	0.01053
1628	0.00168	1628	0.01052
1629	0.00168	1629	0.0105
1630	0.00168	1630	0.0105
1631	0.00167	1631	0.0105
1632	0.00168	1632	0.01049
1633	0.00168	1633	0.01049
1634	0.00168	1634	0.01048
1635	0.00168	1635	0.01048
1636	0.00168	1636	0.01047
1637	0.00168	1637	0.01047
1638	0.00168	1638	0.01047
1639	0.00167	1639	0.01046
1640	0.00167	1640	0.01045
1641	0.00167	1641	0.01045
1642	0.00168	1642	0.01044
1643	0.00167	1643	0.01044
1644	0.00167	1644	0.01043
1645	0.00167	1645	0.01042
1646	0.00167	1646	0.01041
1647	0.00167	1647	0.0104
1648	0.00167	1648	0.0104
1649	0.00167	1649	0.01039
1650	0.00168	1650	0.01039
1651	0.00168	1651	0.01038
1652	0.00168	1652	0.01038
1653	0.00169	1653	0.01037
1654	0.00169	1654	0.01037
1655	0.00169	1655	0.01036
1656	0.00168	1656	0.01037
1657	0.00168	1657	0.01036
1658	0.00168	1658	0.01035
1659	0.00168	1659	0.01035
1660	0.00168	1660	0.01034
1661	0.00168	1661	0.01033
1662	0.00168	1662	0.01033
1663	0.00168	1663	0.01032
1664	0.00168	1664	0.01032
1665	0.00168	1665	0.01032
1666	0.00168	1666	0.01032
1667	0.00168	1667	0.01032
1668	0.00167	1668	0.01032
1669	0.00168	1669	0.01032
1670	0.00168	1670	0.01032
1671	0.00168	1671	0.01032
1672	0.00168	1672	0.01032
1673	0.00168	1673	0.01032
1674	0.00168	1674	0.01031
1675	0.00167	1675	0.0103
1676	0.00167	1676	0.01029
1677	0.00167	1677	0.01029
1678	0.00167	1678	0.01028
1679	0.00167	1679	0.01027
1680	0.00167	1680	0.01026
1681	0.00167	1681	0.01026
1682	0.00167	1682	0.01025
1683	0.00167	1683	0.01025
1684	0.00166	1684	0.01025
1685	0.00167	1685	0.01025
1686	0.00167	1686	0.01025
1687	0.00167	1687	0.01024
1688	0.00167	1688	0.01025
1689	0.00167	1689	0.01024
1690	0.00167	1690	0.01024
1691	0.00167	1691	0.01024
1692	0.00166	1692	0.01024
1693	0.00166	1693	0.01024
1694	0.00166	1694	0.01023
1695	0.00166	1695	0.01022
1696	0.00166	1696	0.01022
1697	0.00166	1697	0.01021
1698	0.00166	1698	0.0102
1699	0.00166	1699	0.01019
1700	0.00166	1700	0.01019
1701	0.00166	1701	0.01018
1702	0.00166	1702	0.01017
1703	0.00166	1703	0.01017
1704	0.00165	1704	0.01016
1705	0.00165	1705	0.01016
1706	0.00165	1706	0.01016
1707	0.00165	1707	0.01016
1708	0.00165	1708	0.01016
1709	0.00165	1709	0.01015
1710	0.00165	1710	0.01014
1711	0.00165	1711	0.01014
1712	0.00165	1712	0.01013
1713	0.00165	1713	0.01013
1714	0.00165	1714	0.01012
1715	0.00165	1715	0.01011
1716	0.00165	1716	0.0101
1717	0.00165	1717	0.01009
1718	0.00165	1718	0.01008
1719	0.00166	1719	0.01008
1720	0.00165	1720	0.01007
1721	0.00165	1721	0.01007
1722	0.00166	1722	0.01006
1723	0.00165	1723	0.01006
1724	0.00166	1724	0.01006
1725	0.00166	1725	0.01005
1726	0.00166	1726	0.01005
1727	0.00166	1727	0.01004
1728	0.00166	1728	0.01003
1729	0.00165	1729	0.01003
1730	0.00164	1730	0.01002
1731	0.00164	1731	0.01001
1732	0.00164	1732	0.01
1733	0.00164	1733	0.01
1734	0.00164	1734	0.00999
1735	0.00164	1735	0.00999
1736	0.00164	1736	0.00999
1737	0.00164	1737	0.00998
1738	0.00165	1738	0.00997
1739	0.00165	1739	0.00997
1740	0.00165	1740	0.00996
1741	0.00165	1741	0.00995
1742	0.00164	1742	0.00994
1743	0.00164	1743	0.00994
1744	0.00164	1744	0.00993
1745	0.00165	1745	0.00991
1746	0.00165	1746	0.00991
1747	0.00164	1747	0.0099
1748	0.00164	1748	0.00991
1749	0.00164	1749	0.0099
1750	0.00164	1750	0.0099
1751	0.00164	1751	0.00989
1752	0.00164	1752	0.00988
1753	0.00165	1753	0.00987
1754	0.00164	1754	0.00987
1755	0.00164	1755	0.00987
1756	0.00165	1756	0.00987
1757	0.00164	1757	0.00987
1758	0.00165	1758	0.00986
1759	0.00165	1759	0.00986
1760	0.00165	1760	0.00986
1761	0.00164	1761	0.00986
1762	0.00164	1762	0.00986
1763	0.00165	1763	0.00986
1764	0.00165	1764	0.00986
1765	0.00165	1765	0.00986
1766	0.00165	1766	0.00986
1767	0.00165	1767	0.00986
1768	0.00165	1768	0.00986
1769	0.00165	1769	0.00986
1770	0.00165	1770	0.00986
1771	0.00164	1771	0.00985
1772	0.00164	1772	0.00986
1773	0.00164	1773	0.00985
1774	0.00164	1774	0.00984
1775	0.00164	1775	0.00985
1776	0.00163	1776	0.00985
1777	0.00164	1777	0.00984
1778	0.00164	1778	0.00984
1779	0.00164	1779	0.00984
1780	0.00164	1780	0.00984
1781	0.00163	1781	0.00985
1782	0.00164	1782	0.00985
1783	0.00164	1783	0.00984
1784	0.00164	1784	0.00983
1785	0.00165	1785	0.00983
1786	0.00165	1786	0.00981
1787	0.00165	1787	0.00981
1788	0.00164	1788	0.00981
1789	0.00164	1789	0.00981
1790	0.00164	1790	0.0098
1791	0.00164	1791	0.0098
1792	0.00163	1792	0.0098
1793	0.00163	1793	0.00979
1794	0.00163	1794	0.00979
1795	0.00163	1795	0.00978
1796	0.00163	1796	0.00978
1797	0.00163	1797	0.00978
1798	0.00163	1798	0.00978
1799	0.00162	1799	0.00978
1800	0.00163	1800	0.00977
1801	0.00162	1801	0.00977
1802	0.00162	1802	0.00977
1803	0.00162	1803	0.00975
1804	0.00162	1804	0.00975
1805	0.00162	1805	0.00974
1806	0.00162	1806	0.00974
1807	0.00162	1807	0.00973
1808	0.00161	1808	0.00972
1809	0.00162	1809	0.00971
1810	0.00162	1810	0.00971
1811	0.00161	1811	0.00971
1812	0.00161	1812	0.00971
1813	0.00162	1813	0.0097
1814	0.00162	1814	0.0097
1815	0.00162	1815	0.00969
1816	0.00162	1816	0.00968
1817	0.00162	1817	0.00968
1818	0.00161	1818	0.00967
1819	0.00161	1819	0.00967
1820	0.00161	1820	0.00966
1821	0.00161	1821	0.00966
1822	0.00161	1822	0.00966
1823	0.00161	1823	0.00965
1824	0.0016	1824	0.00965
1825	0.0016	1825	0.00964
1826	0.0016	1826	0.00964
1827	0.0016	1827	0.00963
1828	0.0016	1828	0.00962
1829	0.0016	1829	0.00963
1830	0.0016	1830	0.00962
1831	0.0016	1831	0.00961
1832	0.0016	1832	0.00961
1833	0.0016	1833	0.0096
1834	0.0016	1834	0.0096
1835	0.0016	1835	0.00959
1836	0.0016	1836	0.00959
1837	0.00161	1837	0.00958
1838	0.00161	1838	0.00957
1839	0.00161	1839	0.00957
1840	0.00161	1840	0.00957
1841	0.0016	1841	0.00958
1842	0.0016	1842	0.00958
1843	0.0016	1843	0.00957
1844	0.00159	1844	0.00957
1845	0.00159	1845	0.00956
1846	0.00159	1846	0.00956
1847	0.00159	1847	0.00955
1848	0.00159	1848	0.00954
1849	0.00158	1849	0.00954
1850	0.00158	1850	0.00954
1851	0.00159	1851	0.00954
1852	0.00159	1852	0.00953
1853	0.00159	1853	0.00952
1854	0.00158	1854	0.00952
1855	0.00158	1855	0.00951
1856	0.00159	1856	0.00952
1857	0.00159	1857	0.00951
1858	0.00159	1858	0.00951
1859	0.00159	1859	0.00951
1860	0.0016	1860	0.0095
1861	0.00159	1861	0.0095
1862	0.00159	1862	0.0095
1863	0.00159	1863	0.0095
1864	0.00159	1864	0.00949
1865	0.00159	1865	0.00949
1866	0.00159	1866	0.00949
1867	0.00159	1867	0.00949
1868	0.00159	1868	0.00949
1869	0.00159	1869	0.00949
1870	0.00159	1870	0.00949
1871	0.00159	1871	0.00948
1872	0.0016	1872	0.00948
1873	0.00159	1873	0.00948
1874	0.0016	1874	0.00947
1875	0.00159	1875	0.00948
1876	0.0016	1876	0.00947
1877	0.0016	1877	0.00946
1878	0.0016	1878	0.00946
1879	0.00161	1879	0.00946
1880	0.0016	1880	0.00945
1881	0.0016	1881	0.00944
1882	0.00161	1882	0.00944
1883	0.00161	1883	0.00944
1884	0.00161	1884	0.00944
1885	0.00161	1885	0.00944
1886	0.0016	1886	0.00944
1887	0.0016	1887	0.00944
1888	0.0016	1888	0.00944
1889	0.0016	1889	0.00943
1890	0.0016	1890	0.00943
1891	0.0016	1891	0.00942
1892	0.0016	1892	0.00942
1893	0.0016	1893	0.00942
1894	0.0016	1894	0.0094
1895	0.0016	1895	0.0094
1896	0.00159	1896	0.00939
1897	0.00159	1897	0.00938
1898	0.00159	1898	0.00937
1899	0.0016	1899	0.00936
1900	0.00159	1900	0.00935
1901	0.0016	1901	0.00935
1902	0.0016	1902	0.00935
1903	0.00159	1903	0.00935
1904	0.00159	1904	0.00934
1905	0.00159	1905	0.00934
1906	0.00159	1906	0.00934
1907	0.00159	1907	0.00933
1908	0.00159	1908	0.00934
1909	0.00159	1909	0.00933
1910	0.00158	1910	0.00933
1911	0.00159	1911	0.00933
1912	0.00159	1912	0.00932
1913	0.00159	1913	0.00932
1914	0.00159	1914	0.00932
1915	0.00158	1915	0.00932
1916	0.00159	1916	0.00932
1917	0.00158	1917	0.00932
1918	0.00158	1918	0.00932
1919	0.00159	1919	0.00931
1920	0.00158	1920	0.00931
1921	0.00158	1921	0.0093
1922	0.00157	1922	0.00929
1923	0.00157	1923	0.00929
1924	0.00157	1924	0.00928
1925	0.00157	1925	0.00927
1926	0.00157	1926	0.00927
1927	0.00158	1927	0.00926
1928	0.00157	1928	0.00926
1929	0.00157	1929	0.00926
1930	0.00157	1930	0.00925
1931	0.00157	1931	0.00925
1932	0.00157	1932	0.00924
1933	0.00158	1933	0.00924
1934	0.00158	1934	0.00923
1935	0.00158	1935	0.00922
1936	0.00158	1936	0.00921
1937	0.00158	1937	0.00921
1938	0.00158	1938	0.00921
1939	0.00158	1939	0.00921
1940	0.00158	1940	0.00921
1941	0.00158	1941	0.0092
1942	0.00158	1942	0.00919
1943	0.00157	1943	0.00919
1944	0.00157	1944	0.00919
1945	0.00157	1945	0.00919
1946	0.00156	1946	0.00918
1947	0.00157	1947	0.00917
1948	0.00157	1948	0.00917
1949	0.00157	1949	0.00916
1950	0.00157	1950	0.00915
1951	0.00157	1951	0.00915
1952	0.00157	1952	0.00914
1953	0.00157	1953	0.00914
1954	0.00157	1954	0.00913
1955	0.00157	1955	0.00913
1956	0.00157	1956	0.00914
1957	0.00157	1957	0.00914
1958	0.00157	1958	0.00915
1959	0.00157	1959	0.00914
1960	0.00156	1960	0.00915
1961	0.00157	1961	0.00916
1962	0.00157	1962	0.00915
1963	0.00157	1963	0.00916
1964	0.00156	1964	0.00915
1965	0.00156	1965	0.00915
1966	0.00156	1966	0.00915
1967	0.00156	1967	0.00915
1968	0.00156	1968	0.00914
1969	0.00156	1969	0.00913
1970	0.00156	1970	0.00912
1971	0.00156	1971	0.00912
1972	0.00156	1972	0.00912
1973	0.00156	1973	0.00911
1974	0.00156	1974	0.0091
1975	0.00157	1975	0.0091
1976	0.00157	1976	0.00909
1977	0.00156	1977	0.00908
1978	0.00157	1978	0.00907
1979	0.00156	1979	0.00907
1980	0.00157	1980	0.00906
1981	0.00156	1981	0.00906
1982	0.00156	1982	0.00905
1983	0.00156	1983	0.00905
1984	0.00156	1984	0.00904
1985	0.00156	1985	0.00904
1986	0.00156	1986	0.00904
1987	0.00156	1987	0.00903
1988	0.00156	1988	0.00904
1989	0.00156	1989	0.00904
1990	0.00155	1990	0.00904
1991	0.00156	1991	0.00904
1992	0.00155	1992	0.00904
1993	0.00155	1993	0.00903
1994	0.00155	1994	0.00903
1995	0.00155	1995	0.00903
1996	0.00155	1996	0.00903
[truncated: 28,003 more rows]

## Sheet: Fig. 3d
r	XY displasement	XY displasement
A	A	A
	Kosmotropic	Chaotropic
0.15	0	0
0.18968	8.37216e-17	1.39294e-18
0.22936	4.31166e-17	7.17364e-19
0.26904	-4.0032e-17	-6.66043e-19
0.30872	-8.39413e-17	-1.3966e-18
0.3484	-6.82846e-18	-1.1361e-19
0.38808	2.00825e-16	3.34127e-18
0.42776	2.22189e-16	3.69673e-18
0.46743	-3.23893e-16	-5.38886e-18
0.50711	-9.54014e-16	-1.58727e-17
0.54679	-1.71933e-16	-2.86058e-18
0.58647	2.62349e-15	4.3649e-17
0.62615	3.17254e-15	5.27839e-17
0.66583	-4.03983e-15	-6.72138e-17
0.70551	-1.3153e-14	-2.18836e-16
0.74519	-3.4887e-15	-5.80441e-17
0.78487	3.50254e-14	5.82745e-16
0.82455	4.55067e-14	7.5713e-16
0.86423	-4.99564e-14	-8.31163e-16
0.90391	-1.81109e-13	-3.01324e-15
0.94359	-6.29222e-14	-1.04688e-15
0.98327	4.66171e-13	7.75604e-15
1.02295	6.49755e-13	1.08105e-14
1.06263	-6.09106e-13	-1.01342e-14
1.1023	-2.48777e-12	-4.13909e-14
1.14198	-1.06347e-12	-1.76937e-14
1.18166	6.18327e-12	1.02876e-13
1.22134	9.23831e-12	1.53705e-13
1.26102	-7.29672e-12	-1.21401e-13
1.3007	-3.4091e-11	-5.67198e-13
1.34038	-1.72471e-11	-2.86952e-13
1.38006	8.17142e-11	1.35954e-12
1.41974	1.30846e-10	2.17698e-12
1.45942	-8.54361e-11	-1.42147e-12
1.4991	-4.66047e-10	-7.75399e-12
1.53878	-2.7181e-10	-4.52232e-12
1.57846	1.07562e-09	1.7896e-11
1.61814	1.84662e-09	3.07236e-11
1.65782	-9.69893e-10	-1.61369e-11
1.69749	-6.35585e-09	-1.05747e-10
1.73717	-4.1942e-09	-6.97822e-11
1.77685	1.40981e-08	2.34561e-10
1.81653	2.59748e-08	4.32162e-10
1.85621	-1.05303e-08	-1.752e-10
1.89589	-8.64688e-08	-1.43865e-09
1.93557	-6.36757e-08	-1.05942e-09
1.97525	1.83918e-07	3.05998e-09
2.01493	3.64226e-07	6.05991e-09
2.05461	-1.06534e-07	-1.77248e-09
2.09429	-1.17346e-06	-1.95238e-08
2.13397	-9.5428e-07	-1.58771e-08
2.17365	2.38694e-06	3.97133e-08
2.21333	5.09224e-06	8.47235e-08
2.25301	-9.45696e-07	-1.57343e-08
2.29269	-1.58847e-05	-2.64286e-07
2.33236	-1.41507e-05	-2.35436e-07
2.37204	3.08006e-05	5.12453e-07
2.41172	7.09947e-05	1.18119e-06
2.4514	-5.99555e-06	-9.97525e-08
2.49108	-0.000214466	-3.56823e-06
2.53076	-0.000207985	-3.46041e-06
2.57044	0.00039488	6.56992e-06
2.61012	0.000987124	1.64235e-05
2.6498	1.16123e-05	1.93203e-07
2.68948	-0.00289	-4.80467e-05
2.72916	-0.00303	-5.04781e-05
2.76884	0.00503	8.36116e-05
2.80852	0.01369	0.000227762
2.8482	0.00142	2.35496e-05
2.88788	-0.03878	-0.000645148
2.92756	-0.04397	-0.000731544
2.96723	0.06662	0.00106
3.00691	0.30484	0.00315
3.04659	0.60069	0.000602199
3.08627	0.87895	-0.00864
3.12595	1.0619	-0.01054
3.16563	1.07333	0.01318
3.20531	0.92947	0.04348
3.24499	0.76863	0.01198
3.28467	0.71216	-0.11529
3.32435	0.73327	-0.15112
3.36403	0.75216	0.16643
3.40371	0.7326	0.805
3.44339	0.70246	1.29987
3.48307	0.69037	1.24503
3.52275	0.69585	0.85472
3.56242	0.70667	0.59241
3.6021	0.71491	0.66108
3.64178	0.71984	0.83617
3.68146	0.72109	0.88567
3.72114	0.71619	0.81994
3.76082	0.70173	0.75955
3.8005	0.67973	0.76743
3.84018	0.66218	0.80024
3.87986	0.66041	0.80996
3.91954	0.67115	0.80601
3.95922	0.68371	0.82696
3.9989	0.69254	0.88265
4.03858	0.70273	0.92391
4.07826	0.71968	0.90198
4.11794	0.73912	0.84365
4.15762	0.75129	0.81865
4.19729	0.75398	0.86052
4.23697	0.76231	0.91903
4.27665	0.79203	0.9375
4.31633	0.83835	0.91794
4.35601	0.88342	0.89973
4.39569	0.91916	0.91198
4.43537	0.96305	0.95595
4.47505	1.03359	1.0274
4.51473	1.10988	1.10734
4.55441	1.14307	1.16636
4.59409	1.108	1.19011
4.63377	1.0493	1.2082
4.67345	1.02209	1.25627
4.71313	1.05094	1.34112
4.75281	1.13629	1.44684
4.79248	1.26519	1.55358
4.83216	1.38333	1.63073
4.87184	1.43145	1.6479
4.91152	1.41199	1.61894
4.9512	1.38149	1.59642
4.99088	1.38544	1.62043
5.03056	1.4223	1.68049
5.07024	1.4798	1.75488
5.10992	1.54623	1.82815
5.1496	1.61037	1.89092
5.18928	1.66049	1.93105
5.22896	1.68268	1.92383
5.26864	1.66324	1.84349
5.30832	1.6086	1.72209
5.348	1.54709	1.65424
5.38768	1.50439	1.70669
5.42735	1.48891	1.80177
5.46703	1.50367	1.8223
5.50671	1.53821	1.73289
5.54639	1.56584	1.59653
5.58607	1.56458	1.47661
5.62575	1.54195	1.4079
5.66543	1.51509	1.41494
5.70511	1.49582	1.48716
5.74479	1.4889	1.56705
5.78447	1.49693	1.60337
5.82415	1.51276	1.60187
5.86383	1.52562	1.58913
5.90351	1.52593	1.58285
5.94319	1.50594	1.58744
5.98287	1.46249	1.60465
6.02255	1.42271	1.62537
6.06222	1.42594	1.63618
6.1019	1.48674	1.63498
6.14158	1.57858	1.63852
6.18126	1.67148	1.66206
6.22094	1.73868	1.69601
6.26062	1.75518	1.71933
6.3003	1.7205	1.72153
6.33998	1.67957	1.71164
6.37966	1.67779	1.70033
6.41934	1.72201	1.6938
6.45902	1.79897	1.69589
6.4987	1.88752	1.70928
6.53838	1.95055	1.73426
6.57806	1.95329	1.77032
6.61774	1.90496	1.81214
6.65741	1.84017	1.85159
6.69709	1.78967	1.88207
6.73677	1.77455	1.90072
6.77645	1.81051	1.90587
6.81613	1.86675	1.9044
6.85581	1.88252	1.90862
6.89549	1.82996	1.92322
6.93517	1.76787	1.93287
6.97485	1.76383	1.9211
7.01453	1.81571	1.89986
7.05421	1.87137	1.90149
7.09389	1.89219	1.94041
7.13357	1.8822	1.97737
7.17325	1.8535	1.96718
7.21293	1.82247	1.92376
7.25261	1.80896	1.90834
7.29228	1.82796	1.9583
7.33196	1.87807	2.02824
7.37164	1.95283	2.05849
7.41132	2.01345	2.0398
7.451	1.99238	2.00766
7.49068	1.86148	1.99062
7.53036	1.74234	1.98555
7.57004	1.78379	1.9821
7.60972	1.96618	1.97299
7.6494	2.10355	1.95396
7.68908	2.05773	1.9259
7.72876	1.92011	1.91081
7.76844	1.83856	1.93494
7.80812	1.86449	1.99048
7.8478	1.94349	2.0322
7.88747	2.01881	2.02501
7.92715	2.04799	1.99066
7.96683	1.99449	1.96704
8.00651	1.87886	1.97186
8.04619	1.79123	1.99812
8.08587	1.89858	1.99561
8.12555	1.96743	2.02359
8.16523	2.00221	2.02064
8.20491	1.97396	1.98873
8.24459	1.93621	1.96259
8.28427	1.93981	1.97214
8.32395	1.98366	2.00422
8.36363	2.04731	2.02983
8.40331	2.11293	2.03621
8.44299	2.16675	2.03524
8.48267	2.19653	2.03927
8.52234	2.19832	2.05006
8.56202	2.17171	2.06501
8.6017	2.12412	2.08429
8.64138	2.07601	2.11279
8.68106	2.04659	2.1535
8.72074	2.03532	2.19107
8.76042	2.03241	2.20163
8.8001	2.03143	2.17472
8.83978	2.03238	2.12521
8.87946	2.03645	2.07033
8.91914	2.04921	2.02375
8.95882	2.07853	1.99728
8.9985	2.12047	1.9998
9.03818	2.14639	2.0341
9.07786	2.12979	2.09956
9.11754	2.09821	2.16835
9.15721	2.11071	2.19674
9.19689	2.1851	2.16746
9.23657	2.24132	2.12571
9.27625	2.1955	2.12112
9.31593	2.08494	2.14977
9.35561	2.02608	2.1727
9.39529	2.08099	2.16507
9.43497	2.16496	2.14082
9.47465	2.17641	2.11958
9.51433	2.11099	2.11251
9.55401	2.03509	2.12461
9.59369	1.99445	2.15651
9.63337	1.96883	2.19625
9.67305	1.92873	2.22924
9.71273	1.89153	2.23508
9.7524	1.91256	2.18872
9.79208	2.01763	2.08851
9.83176	2.13038	2.01123
9.87144	2.15813	2.0445
9.91112	2.10404	2.17017
9.9508	2.05749	2.2749
9.99048	2.0829	2.27519
10.0302	2.13915	2.21261
10.0698	2.16235	2.1563
10.1095	2.13673	2.13248
10.1492	2.09457	2.1245
10.1889	2.06223	2.11855
10.2286	2.03196	2.12083
10.2682	1.98737	2.1422
10.3079	1.92495	2.17466
10.3476	1.85546	2.18924
10.3873	1.79233	2.16493
10.4269	1.75819	2.12406
10.4666	1.77751	2.10125
10.5063	1.8431	2.10642
10.546	1.90865	2.119
10.5857	1.93771	2.12059
10.6253	1.96044	2.11494
10.665	2.02827	2.11302
10.7047	2.1386	2.11577
10.7444	2.21459	2.11029
10.7841	2.19064	2.08784
10.8238	2.1035	2.07125
10.8634	2.0281	2.09473
10.9031	2.00399	2.1595
10.9428	2.01649	2.21625
10.9825	2.0455	2.21881
11.0221	2.06536	2.17254
11.0618	2.0483	2.10485
11.1015	1.99129	2.04963
11.1412	1.93342	2.05169
11.1809	1.91314	2.14563
11.2205	1.93107	2.27674
11.2602	1.96977	2.3482
11.2999	2.01167	2.31769
11.3396	2.03911	2.24701
11.3793	2.03895	2.20255
11.4189	2.03928	2.1864
11.4586	2.08987	2.16645
11.4983	2.19034	2.13067
11.538	2.2333	2.11038
11.5777	2.11539	2.13797
11.6173	1.91836	2.19936
11.657	1.83374	2.25285
11.6967	1.95492	2.27005
11.7364	2.13819	2.25509
11.776	2.21719	2.21743
11.8157	2.16944	2.17349
11.8554	2.06785	2.1443
11.8951	1.97548	2.1403
11.9348	1.92464	2.14334
11.9744	1.93958	2.13219
12.0141	2.0033	2.1086
12.0538	2.06837	2.09127
12.0935	2.10063	2.09402
12.1332	2.10807	2.11476
12.1729	2.10643	2.14771
12.2125	2.10962	2.17417
12.2522	2.13006	2.16491
12.2919	2.17113	2.10535
12.3316	2.20569	2.03159
12.3712	2.20184	1.98876
12.4109	2.16116	1.98878
12.4506	2.11571	2.01327
12.4903	2.0911	2.04431
12.53	2.08398	2.06999
12.5696	2.08432	2.0803
12.6093	2.0879	2.07729
12.649	2.09637	2.07522
12.6887	2.10773	2.0837
12.7284	2.103	2.08997
12.768	2.06017	2.07579
12.8077	2.00093	2.03903
12.8474	1.9962	1.99562
12.8871	2.09343	1.96157
12.9268	2.21292	1.94833
12.9664	2.2391	1.96563
13.0061	2.15639	2.00953
13.0458	2.07434	2.05898
13.0855	2.08621	2.09356
13.1251	2.15188	2.10199
13.1648	2.18673	2.0765
13.2045	2.16159	2.02575
13.2442	2.12457	1.98127
13.2839	2.12208	1.97081
13.3235	2.1542	1.98819
13.3632	2.2032	2.01427
13.4029	2.25116	2.03596
13.4426	2.27991	2.04958
13.4823	2.27319	2.05311
13.5219	2.22833	2.05025
13.5616	2.14871	2.04715
13.6013	2.05597	2.0456
13.641	2.00318	2.03982
13.6807	2.03677	2.02433
13.7203	2.12416	2.00219
13.76	2.19489	1.98052
13.7997	2.214	1.96234
13.8394	2.21546	1.94274
13.8791	2.23742	1.91794
13.9187	2.28418	1.90334
13.9584	2.3417	1.92456
13.9981	2.3963	1.98302
14.0378	2.43541	2.02771
14.0775	2.4469	2.00805
14.1171	2.42159	1.94981
14.1568	2.35218	1.92478
14.1965	2.25601	1.96744
14.2362	2.20988	2.02069
14.2759	2.28827	2.01939
14.3155	2.42888	1.96635
14.3552	2.47764	1.90998
14.3949	2.35676	1.88686
14.4346	2.2	1.89917
14.4742	2.16497	1.94224
14.5139	2.24187	1.99586
14.5536	2.29583	2.0282
14.5933	2.23923	2.0209
14.633	2.13791	1.99745
14.6727	2.08307	1.98802
14.7123	2.10236	2.00062
14.752	2.17055	2.02489
14.7917	2.25927	2.0507
14.8314	2.3348	2.07067
14.871	2.36402	2.07826
14.9107	2.34794	2.07197
14.9504	2.31922	2.05501
14.9901	2.3027	2.03231
15.0298	2.28852	2.015
15.0694	2.2592	2.01505
15.1091	2.2161	2.02958
15.1488	2.18	2.04035
15.1885	2.16964	2.03415
15.2282	2.19106	2.02252
15.2678	2.24606	2.02329
15.3075	2.31492	2.03799
15.3472	2.35334	2.04959
15.3869	2.32975	2.04494
15.4266	2.28222	2.03502
15.4662	2.26893	2.03777
15.5059	2.29798	2.05158
15.5456	2.31395	2.05008
15.5853	2.27244	2.01312
15.625	2.21354	1.96417
15.6646	2.20565	1.94136
15.7043	2.26553	1.9571
15.744	2.33699	1.98747
15.7837	2.36895	2.0093
15.8233	2.37735	2.02135
15.863	2.40371	2.03089
15.9027	2.45037	2.03997
15.9424	2.45801	2.0424
15.9821	2.37583	2.03262
16.0217	2.25306	2.01435
16.0614	2.1822	1.99542
16.1011	2.20326	1.98061
16.1408	2.26401	1.96943
16.1805	2.30885	1.9609
16.2201	2.33087	1.95441
16.2598	2.34698	1.94956
16.2995	2.3653	1.9474
16.3392	2.37648	1.95184
16.3789	2.37038	1.96631
16.4185	2.34868	1.98683
16.4582	2.31948	2.00533
16.4979	2.28936	2.01499
16.5376	2.26128	2.0118
16.5772	2.23871	1.99378
16.6169	2.23538	1.97662
16.6566	2.27127	1.9868
16.6963	2.35089	2.02997
16.736	2.4406	2.06036
16.7756	2.50255	2.03029
16.8153	2.51803	1.96482
16.855	2.48137	1.93848
16.8947	2.4077	1.9897
16.9344	2.36868	2.0549
16.974	2.43834	2.05866
17.0137	2.58448	2.00654
17.0534	2.6944	1.96545
17.0931	2.68623	1.97624
17.1328	2.57981	1.99434
17.1724	2.41706	1.96281
17.2121	2.28285	1.89555
17.2518	2.29813	1.86619
17.2915	2.51395	1.92212
17.3312	2.73322	2.01279
17.3708	2.71701	2.06879
17.4105	2.47763	2.07237
17.4502	2.26265	2.05412
17.4899	2.25908	2.04011
17.5296	2.37976	2.03113
17.5692	2.47395	2.02185
17.6089	2.48765	2.00946
17.6486	2.46757	1.99377
17.6883	2.45409	1.97536
17.728	2.43856	1.95779
17.7676	2.39978	1.94542
17.8073	2.34798	1.94233
17.847	2.32978	1.95225
17.8867	2.37915	1.97543
17.9263	2.45654	1.99462
17.966	2.50019	1.98775
18.0057	2.47977	1.95674
18.0454	2.40545	1.9344
18.0851	2.29662	1.94741
18.1247	2.21012	1.97595
18.1644	2.21453	1.98439
18.2041	2.30577	1.96401
18.2438	2.3759	1.94461
18.2835	2.33204	1.95333
18.3231	2.22986	1.98086
18.3628	2.18277	2.0036
18.4025	2.23016	2.00731
18.4422	2.29338	1.99275
18.4819	2.29582	1.96369
18.5215	2.25311	1.93653
18.5612	2.22157	1.93303
18.6009	2.23318	1.95702
18.6406	2.27636	1.98038
18.6803	2.33391	1.97568
18.7199	2.37958	1.94846
18.7596	2.38269	1.92055
18.7993	2.32749	1.90455
18.839	2.22789	1.8945
18.8787	2.10602	1.88365
18.9183	2.02924	1.87849
18.958	2.08963	1.89286
18.9977	2.29549	1.93071
19.0374	2.46859	1.97392
19.077	2.42628	2.00228
19.1167	2.21339	2.00526
19.1564	2.01548	1.97837
19.1961	1.96227	1.92808
19.2358	2.03939	1.88795
19.2754	2.20743	1.89201
19.3151	2.38869	1.92752
19.3548	2.47905	1.94953
19.3945	2.42093	1.92855
19.4342	2.28815	1.88003
19.4738	2.17392	1.8274
19.5135	2.12122	1.79678
19.5532	2.13446	1.81636
19.5929	2.20344	1.89462
19.6326	2.27517	1.97789
19.6722	2.29205	2.00355
19.7119	2.26288	1.96536
19.7516	2.25314	1.90523
19.7913	2.30626	1.85812
19.831	2.38103	1.8289
19.8706	2.41753	1.81576
19.9103	2.35582	1.81692
19.95	2.13596	1.83057

## Sheet: Fig. 4a
	pH value change	Li+ concentration change
		ppm
Water	4.45	1.85316
Chaotropic	4.153	1.32757
Kosmotropic	1.376	0.73107

## Sheet: Fig. 4b
	Corroded area
	%
Water	11.45
Chatropic	10.36
Kosmotropic	1.27

## Sheet: Fig. 4c
	(I(006)+I(102))/I(101)	I(003)/I(104)
Pristine	0.4146	1.46
Kosmotropic	0.4149	1.43151
Chaotropic	0.4222	1.32646
Water	0.4429	1.1772

[truncated: 20 more sheets: Fig. 5a, Fig. 5b, Fig. 5c, Fig. 5d, Fig. 5e, SI1, SI2, SI3, SI5, SI6, SI7, SI12, SI15, SI16, SI17, SI18, SI19, SI 23, SI24, SI26]
